# Supplementary material for: A one-pot route toN-acyl ureas: a formal four-component hydrolytic reaction involving aminonitrones and isocyanide dibromides
Source: Royal Society of Chemistry journal article supplement (doi:10.1039/c9nj05445f), 2019-12-16
Supplement: c9nj05445f1.pdf [file c9nj05445f1.pdf]

## Electronic Supporting Information

### **Expedient One-pot Route to *N*-Acyl Ureas: a Formal Four-Component Hydrolytic Reaction Involving Aminonitrones and Isocyanide Dibromides**

Mikhail V. Il'in,<sup>a</sup> Liana A. Lesnikova,<sup>a</sup> Dmitrii S. Bolotin,<sup>a,\*</sup> Alexander S. Novikov,<sup>a</sup>  
Vitalii V. Suslonov,<sup>b</sup> Vadim Yu. Kukushkin<sup>a,\*</sup>

<sup>a</sup> Institute of Chemistry, Saint Petersburg State University, Universitetskaya Nab., 7/9, Saint Petersburg, Russian Federation

<sup>b</sup> Center for X-ray Diffraction Studies, Saint Petersburg State University, Universitetskii Pr., 26, Saint Petersburg, Russian Federation

### Table of Contents

|                                                     |    |
|-----------------------------------------------------|----|
| Synthesis and characterization of <b>1–12</b> ..... | 2  |
| Crystal data for <b>3</b> and <b>10</b> .....       | 9  |
| Spectra of <b>1–12</b> .....                        | 10 |
| Computational Details.....                          | 58 |

## Synthesis and characterization of 1–12

A solution of Br<sub>2</sub> (1.2 mmol) in CHCl<sub>3</sub> (1 mL) was added dropwisely (1 min) to a stirred solution of an isocyanide (1.2 mmol) in CHCl<sub>3</sub> (1 mL) placed in 10-mL round-bottomed flask. The mixture was kept on stirring for 2 min at RT in air and then an aminonitrone (1.0 mmol) and Et<sub>3</sub>N (1.0 mmol) were added to the reaction mixture. After 5 min a mixture of EtOH and H<sub>2</sub>O (5:1, v/v) was added. The reaction mixture was left on stirring upon reflux for 24 h, whereupon the solvent was evaporated *in vacuo* at 40 °C and **1–12** were isolated by column chromatography (for each product eluent is specified in their characterization below).

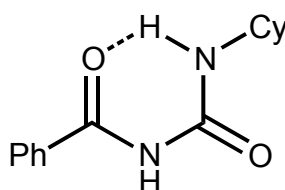

**1.** Yield: 92% (228 mg). Mp: 156–158 °C.  $R_f$  = 0.30 (EtOAc/Hexane, 2:8). High resolution ESI<sup>+</sup>-MS (MeOH,  $m/z$ ): 269.1265 ([M + Na]<sup>+</sup>, calcd 269.1260). IR (KBr, selected bands, cm<sup>-1</sup>): 3281 (m), 3226 (m)  $\nu$ (N–H). 3071 (w–m), 2941 (m–s), 2853 (m)  $\nu$ (C–H); 1692 (vs), 1667(s)  $\nu$ (C=O). <sup>1</sup>H NMR (CDCl<sub>3</sub>,  $\delta$ ): 9.18 (s, 1H, C(=O)–NH–C(=O)), 8.69 (d, <sup>3</sup> $J_{\text{HH}}$  = 7.0 Hz, 1H, C(=O)–NH–Cy), 7.97–7.95 (m, 2H, CH), 7.63–7.99 (m, 1H, CH), 7.52–7.48 (m, 2H, CH), 3.84–3.78 (m, 1H, NH–CH), 2.03–2.00 (m, 2H, CH<sub>2</sub>), 1.81–1.76 (m, 2H, CH<sub>2</sub>), 1.66–1.62 (m, 1H, CH<sub>2</sub>), 1.48–1.24 (m, 5H, CH<sub>2</sub>). <sup>13</sup>C{<sup>1</sup>H} NMR (CDCl<sub>3</sub>,  $\delta$ ): 168.02, 153.20 (C(=O)–NH–C(=O) and C(=O)–NH–Cy); 132.98, 132.58, 128.79, 127.65 (Ar); 48.93 (NH–CH); 32.87, 25.57, 24.68 (Cy).

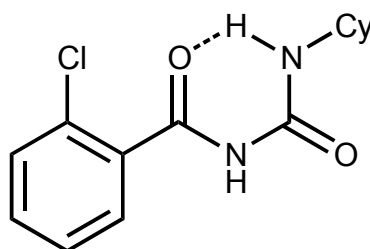

**2.** Yield: 51% (142 mg). Mp: 163–165 °C.  $R_f$  = 0.67 (EtOAc/Hexane, 1:1). High resolution ESI<sup>+</sup>-MS (MeOH,  $m/z$ ): 303.0884 ([M + Na]<sup>+</sup>, calcd 303.0871). IR (KBr, selected bands, cm<sup>-1</sup>): 3318 (s), 3215 (w–m)  $\nu$ (N–H); 3083 (m), 2931 (s), 2855 (m–s)  $\nu$ (C–H); 1676 (vs)  $\nu$ (C=O). <sup>1</sup>H NMR

(CDCl<sub>3</sub>,  $\delta$ ): 8.94 + 8.83 (s, br, 1H, C(=O)–NH–C(=O)), 8.37 (d,  $^3J_{\text{HH}} = 6.9$  Hz, 1H, C(=O)–NH–Cy), 7.65 (d,  $^3J_{\text{HH}} = 7.8$  Hz, 1H, CH), 7.48–7.43 (m, 2H, CH), 7.41–7.36 (m, 1H, CH), 3.75–3.67 (m, 1H, NH–CH), 1.98–1.95 (m, 2H, CH<sub>2</sub>), 1.78–1.74 (m, 2H, CH<sub>2</sub>), 1.64–1.61 (m, 1H, CH), 1.44–1.24 (m, 5H, CH<sub>2</sub>). <sup>13</sup>C{<sup>1</sup>H} NMR (CDCl<sub>3</sub>,  $\delta$ ): 167.35, 152.33 (C(=O)–NH–C(=O) and C(=O)–NH–Cy); 133.38, 132.41, 131.19, 130.66, 129.89, 127.12 (Ar); 49.00 (NH–CH); 32.82, 25.52, 24.67 (Cy).

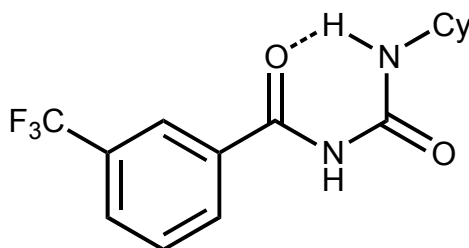

**3.** Yield: 95% (182 mg). Mp: 134–135 °C.  $R_f = 0.44$  (EtOAc/Hexane, 2:8). High resolution ESI<sup>+</sup>-MS (MeOH,  $m/z$ ): 315.1318 ([M + H]<sup>+</sup>, calcd 315.1315), 337.1143 ([M + Na]<sup>+</sup>, calcd 337.1134), 353.0884 ([M + Na]<sup>+</sup>, calcd 353.0874). IR (KBr, selected bands, cm<sup>-1</sup>): 3280 (s), 3237 (s)  $\nu$ (N–H); 3162 (m), 3131 (m), 2932 (s), 2860(m–s)  $\nu$ (C–H); 1691 (vs)  $\nu$ (C=O). <sup>1</sup>H NMR (CDCl<sub>3</sub>,  $\delta$ ): 10.33 (s, 1H, C(=O)–NH–C(=O)), 8.79 (d,  $^3J_{\text{HH}} = 7.4$  Hz, 1H, C(=O)–NH–Cy), 8.37 (s, 1H, CH), 8.26 (d, 1H,  $^3J_{\text{HH}} = 7.8$  Hz, CH), 7.87 (d,  $^3J_{\text{HH}} = 7.7$  Hz, 1H, CH), 7.64 (t,  $^3J_{\text{HH}} = 7.8$  Hz, 1H, CH), 3.87–3.80 (m, 1H, NH–CH), 2.00–1.97 (m, 2H, CH<sub>2</sub>), 1.78–1.75 (m, 2H, CH<sub>2</sub>), 1.66–1.62 (m, 1H, CH<sub>2</sub>), 1.48–1.28 (m, 5H, CH<sub>2</sub>). <sup>13</sup>C{<sup>1</sup>H} NMR (CDCl<sub>3</sub>,  $\delta$ ): 167.20, 153.76 (C(=O)–NH–C(=O) and C(=O)–NH–Cy); 133.54 (s), 131.50 (s), 131.44, 131.11 (q,  $^2J_{\text{CF}} = 33.2$  Hz), 129.38, 129.35 (q,  $^3J_{\text{CF}} = 3.5$  Hz), 129.17 (s), 125.17, 125.14 (q,  $^3J_{\text{CF}} = 3.7$  Hz) (Ar); 125.01, 122.31 (q,  $CF_3$ ,  $^1J_{\text{CF}} = 272.6$  Hz), 48.65 (NH–CH); 32.84, 25.53, 24.51 (Cy).

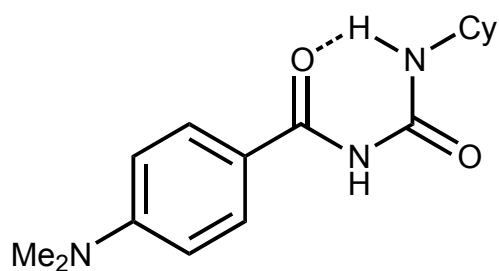

4. Yield: 45% (130 mg). Mp: 182–183 °C.  $R_f = 0.50$  (EtOAc/Hexane, 1:1). High resolution ESI<sup>+</sup>-MS (MeOH,  $m/z$ ): 290.1873 ( $[M + H]^+$ , calcd 290.1863), 312.1700 ( $[M + Na]^+$ , calcd 312.1682). IR (KBr, selected bands,  $\text{cm}^{-1}$ ): 3275 (m), 3119 (w-m)  $\nu(\text{N-H})$ ; 2929 (m-s), 2852 (m)  $\nu(\text{C-H})$ ; 1689 (vs), 1659 (s)  $\nu(\text{C=O})$ . <sup>1</sup>H NMR ( $\text{CDCl}_3$ ,  $\delta$ ): 8.72 (d,  $^3J_{\text{HH}} = 7.5$  Hz, 1H, C(=O)-NH-Cy), 8.01 (s, 1H, C(=O)-NH-C(=O)), 7.74 (d,  $^3J_{\text{HH}} = 8.9$  Hz, 2H, CH), 6.70 (d,  $^3J_{\text{HH}} = 8.9$  Hz, 2H, CH), 3.85–3.78 (m, 1H, NH-CH), 3.08 (s, 6H, N(CH<sub>3</sub>)<sub>2</sub>), 2.02–1.99 (m, 2H, CH<sub>2</sub>), 1.79–1.75 (m, 2H, CH<sub>2</sub>), 1.62–1.58 (m, 1H, CH<sub>2</sub>), 1.48–1.22 (m, 5H, CH<sub>2</sub>). <sup>13</sup>C{<sup>1</sup>H} NMR ( $\text{CDCl}_3$ ,  $\delta$ ): 167.35, 153.38 (C(=O)-NH-C(=O) and C(=O)-NH-Cy); 129.18, 118.49, 111.06 (Ar); 48.68 (NH-CH); 40.01 (CH<sub>3</sub>); 32.99, 25.60, 24.67 (Cy).

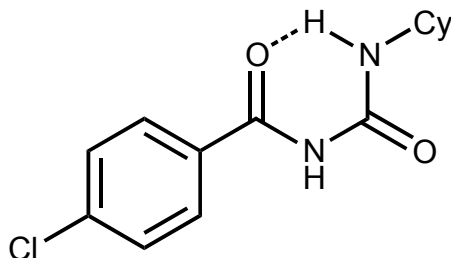

5. Yield: 96% (270 mg). Mp: 217–218 °C.  $R_f = 0.45$  (EtOAc/Hexane, 2:8). High resolution ESI<sup>+</sup>-MS (MeOH,  $m/z$ ): 303.0861 ( $[M + Na]^+$ , calcd 303.0870). IR (KBr, selected bands,  $\text{cm}^{-1}$ ): 3288 (m-s), 3225 (m-s)  $\nu(\text{N-H})$ ; 3131 (m), 2934 (m-s), 2851 (m)  $\nu(\text{C-H})$ ; 1691 (vs), 1672 (vs)  $\nu(\text{C=O})$ . <sup>1</sup>H NMR ( $\text{CDCl}_3$ ,  $\delta$ ): 10.14 (s, 1H, C(=O)-NH-C(=O)), 8.77 (d,  $J_{\text{HH}} = 6.5$  Hz, 1H, C(=O)-NH-Cy), 8.02 (d,  $^3J_{\text{HH}} = 8.5$  Hz, 2H, CH), 7.46 (d,  $^3J_{\text{HH}} = 8.6$  Hz, 2H, CH), 3.85–3.75 (m, 1H, NH-CH), 2.01–1.98 (m, 2H, CH<sub>2</sub>), 1.81–1.77 (m, 2H, CH<sub>2</sub>), 1.68–1.65 (m, 1H, CH<sub>2</sub>), 1.49–1.28 (m, 5H, CH<sub>2</sub>). <sup>13</sup>C{<sup>1</sup>H} NMR ( $\text{CDCl}_3$ ,  $\delta$ ): 167.36, 153.85 (C(=O)-NH-C(=O) and C(=O)-NH-Cy); 139.41, 130.93, 129.52, 128.91 (Ar); 49.10 (NH-CH); 32.74, 25.55, 24.63 (Cy).

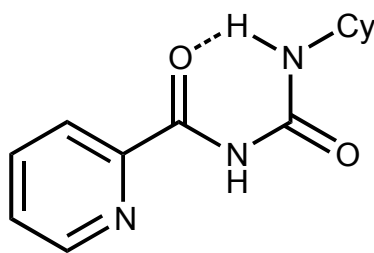

6. Yield: 47% (115 mg). Mp: 81–82 °C.  $R_f = 0.30$  (EtOAc/Hexane, 2:8). High resolution ESI<sup>+</sup>-MS (MeOH,  $m/z$ ): 270.1212 ([M + Na]<sup>+</sup>, calcd 270.1213), 286.0951 ([M + K]<sup>+</sup>, calcd 286.0952). IR (KBr, selected bands, cm<sup>-1</sup>): 3340 (s), 3281 (s)  $\nu$ (N–H); 3072 (w–m), 2931 (s), 2853 (s)  $\nu$ (C–H); 1689 (vs)  $\nu$ (C=O). <sup>1</sup>H NMR (CDCl<sub>3</sub>,  $\delta$ ): 9.88 (s, 1H, C(=O)–NH–C(=O)), 8.63 (d, <sup>3</sup> $J_{\text{HH}} = 4.4$  Hz, 1H, CH), 8.39 (d, <sup>3</sup> $J_{\text{HH}} = 6.4$  Hz, 1H, C(=O)–NH–Cy), 8.21 (d, <sup>3</sup> $J_{\text{HH}} = 7.8$  Hz, 1H, CH), 7.92 (td, <sup>3</sup> $J_{\text{HH}} = 7.7$  Hz, <sup>4</sup> $J_{\text{HH}} = 1.5$  Hz, 1H, CH), 7.55–7.52 (m, 1H, CH), 3.87–3.78 (m, 1H, NH–CH), 2.02–1.99 (m, 2H, CH<sub>2</sub>), 1.78–1.74 (m, 2H, CH<sub>2</sub>), 1.64–1.60 (m, 1H, CH<sub>2</sub>), 1.48–1.22 (m, 5H, CH<sub>2</sub>). <sup>13</sup>C{<sup>1</sup>H} NMR (CDCl<sub>3</sub>,  $\delta$ ): 164.69, 151.93 (C(=O)–NH–C(=O) and C(=O)–NH–Cy); 148.56, 147.91, 137.69, 127.46, 122.76 (Ar); 48.65 (NH–CH); 32.98, 25.56, 24.62 (Cy).

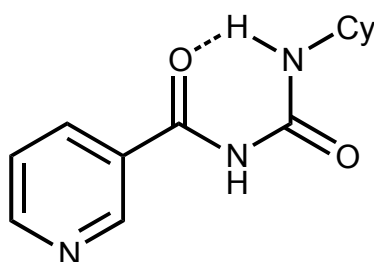

7. Yield: 78% (191 mg). Mp: 142–143 °C.  $R_f = 0.30$  (EtOAc). High resolution ESI<sup>+</sup>-MS (MeOH,  $m/z$ ): 248.1388 ([M + H]<sup>+</sup>, calcd 248.1394), 270.1210 ([M + Na]<sup>+</sup>, calcd 270.1213). IR (KBr, selected bands, cm<sup>-1</sup>): 3293 (m–s), 3223 (m–s)  $\nu$ (N–H); 3143 (m), 3080 (m–w), 2925 (s), 2855 (m–s)  $\nu$ (C–H); 1690 (vs)  $\nu$ (C=O). <sup>1</sup>H NMR (CDCl<sub>3</sub>,  $\delta$ ): 10.54 (s, 1H, C(=O)–NH–C(=O)), 9.28 (s, 1H, C(=O)–NH–Cy), 8.84 (d, <sup>3</sup> $J_{\text{HH}} = 3.9$  Hz, 1H, CH), 8.72 (d, <sup>3</sup> $J_{\text{HH}} = 7.3$  Hz, 1H, CH), 8.46 (d, <sup>3</sup> $J_{\text{HH}} = 8.0$  Hz, 1H, CH), 7.47 (dd, <sup>3</sup> $J_{\text{HH}} = 7.8$  Hz, <sup>3</sup> $J_{\text{HH}} = 4.9$  Hz, 1H, CH), 3.84–3.77 (m, 1H, NH–CH), 2.00–1.97 (m, 2H, CH<sub>2</sub>), 1.79–1.75 (m, 2H, CH<sub>2</sub>), 1.66–1.63 (m, 1H, CH<sub>2</sub>), 1.49–1.25 (m, 5H, CH<sub>2</sub>). <sup>13</sup>C{<sup>1</sup>H} NMR (CDCl<sub>3</sub>,  $\delta$ ): 166.65, 153.67 (C(=O)–NH–C(=O) and C(=O)–NH–Cy); 152.65, 149.09, 136.16, 128.73, 123.41 (Ar); 49.08 (NH–CH); 32.68, 25.52, 24.55 (Cy).

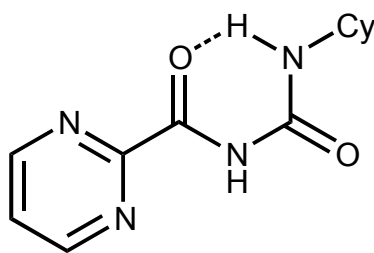

**8.** Yield: 77% (190 mg). Mp: 118–119 °C.  $R_f = 0.40$  (EtOAc). High resolution ESI<sup>+</sup>-MS (MeOH,  $m/z$ ): 271.1163 ([M + Na]<sup>+</sup>, calcd 271.1165), 287.0895 ([M + K]<sup>+</sup>, calcd 287.0905). IR (KBr, selected bands, cm<sup>-1</sup>): 3338 (s), 3052 (w–m)  $\nu$ (N–H); 2933 (s), 2854 (m–s)  $\nu$ (C–H); 1696 (s)  $\nu$ (C=O). <sup>1</sup>H NMR (CDCl<sub>3</sub>,  $\delta$ ): 9.77 (s, 1H, C(=O)–NH–C(=O)), 8.97 (d, <sup>3</sup> $J_{\text{HH}} = 4.9$  Hz, 2H, CH), 8.43 (d, <sup>3</sup> $J_{\text{HH}} = 6.8$  Hz, 1H, C(=O)–NH–CH), 7.55 (t, <sup>3</sup> $J_{\text{HH}} = 4.9$  Hz, 1H, CH), 3.89–3.80 (m, 1H, CH), 2.02–1.99 (m, 2H, CH<sub>2</sub>), 1.80–1.75 (m, 2H, CH<sub>2</sub>), 1.65–1.61 (m, 1H, CH<sub>2</sub>), 1.49–1.23 (m, 5H, CH<sub>2</sub>). <sup>13</sup>C{<sup>1</sup>H} NMR (CDCl<sub>3</sub>,  $\delta$ ): 162.28, 157.85 (C(=O)–NH–C(=O) and C(=O)–NH–Cy); 156.20, 151.55, 123.42 (Ar); 48.79 (NH–CH); 32.82, 25.51, 24.50 (Cy).

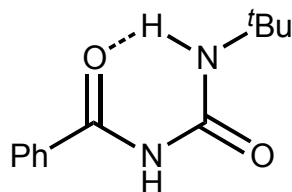

**9.** Yield: 71% (156 mg). Mp: 111–112 °C.  $R_f = 0.61$  (EtOAc/Hexane, 2:8). High resolution ESI<sup>+</sup>-MS (MeOH,  $m/z$ ): 243.1118 ([M + Na]<sup>+</sup>, calcd 243.1104) 259.0848 ([M + K]<sup>+</sup>, calcd 259.0843). IR (KBr, selected bands, cm<sup>-1</sup>): 3263 (s), 3132 (m–s)  $\nu$ (N–H); 3062 (m), 2974 (m–s)  $\nu$ (C–H); 1696 (vs), 1664(s)  $\nu$ (C=O). <sup>1</sup>H NMR (CDCl<sub>3</sub>,  $\delta$ ): 9.96 (s, 1H, C(=O)–NH–C(=O)), 8.90 (s, 1H, C(=O)–NH–<sup>t</sup>Bu), 8.08 (d, <sup>3</sup> $J_{\text{HH}} = 7.6$  Hz, 2H, CH), 7.61–7.58 (m, 1H, CH), 7.51–7.47 (m, 2H, CH), 1.47 (s, 9H, CH<sub>3</sub>). <sup>13</sup>C{<sup>1</sup>H} NMR (CDCl<sub>3</sub>,  $\delta$ ): 168.52, 153.32 (C(=O)–NH–C(=O) and C(=O)–NH–<sup>t</sup>Bu), 132.82, 132.67, 128.65, 127.94 (Ar); 50.98 (NH–C); 28.89 (CH<sub>3</sub>).

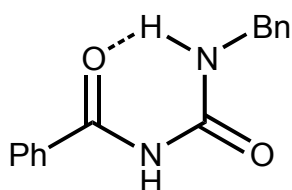

**10.** Yield: 44% (110 mg). Mp: 164–165 °C.  $R_f = 0.30$  (EtOAc/Hexane, 2:8). High resolution ESI<sup>+</sup>-MS (MeOH,  $m/z$ ): 277.0939 ( $[M + Na]^+$ , calcd 277.0947). IR (KBr, selected bands,  $\text{cm}^{-1}$ ): 3378 (m), 3304 (m-s)  $\nu(\text{N-H})$ ; 3064 (w-m), 3032 (w-m), 2948 (m-w)  $\nu(\text{C-H})$ ; 1693 (vs), 1667(vs)  $\nu(\text{C=O})$ . <sup>1</sup>H NMR (CDCl<sub>3</sub>,  $\delta$ ): 9.93 (s, 1H, C(=O)-NH-C(=O)), 9.24 (s, 1H, C(O=)-NH-CH<sub>2</sub>), 8.03–8.00 (m, 2H, CH), 7.61–7.57 (m, 1H, CH), 7.48–7.44 (m, 2H, CH), 7.40–7.35 (m, 4H, CH), 7.33–7.31 (m, 1H, CH), 4.60 (d, <sup>3</sup> $J_{\text{HH}} = 5.9$  Hz, 2H, CH<sub>2</sub>). <sup>13</sup>C{<sup>1</sup>H} NMR (CDCl<sub>3</sub>,  $\delta$ ): 168.37, 154.71 (C(=O)-NH-C(=O) and C(=O)-NH-CH<sub>2</sub>); 138.14, 133.03, 132.39, 128.70, 127.93, 127.52, 127.45 (Ar); 43.80 (NH-CH<sub>2</sub>).

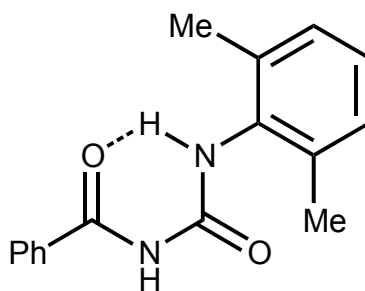

**11.** Yield: 32% (84 mg). Mp: 237–238 °C.  $R_f = 0.48$  (EtOAc/Hexane, 2:8). High resolution ESI<sup>+</sup>-MS (MeOH,  $m/z$ ): 291.1107 ( $[M + Na]^+$ , calcd 291.1104), 307.0843 ( $[M + K]^+$ , calcd 307.0843). IR (KBr, selected bands,  $\text{cm}^{-1}$ ): 3266 (m-s), 3128 (m)  $\nu(\text{N-H})$ ; 2966 (w-m), 2923 (w-m)  $\nu(\text{C-H})$ ; 1690 (vs), 1664(vs)  $\nu(\text{C=O})$ . <sup>1</sup>H NMR (CDCl<sub>3</sub>,  $\delta$ ): 10.23 (s, 1H, C(=O)-NH-C(=O)), 9.74 (s, 1H, C(=O)-NH-Xyl), 8.02 (d, <sup>3</sup> $J_{\text{HH}} = 7.4$  Hz, 2H, CH), 7.62–7.58 (m, 1H, CH), 7.45–7.41 (m, 2H, CH), 7.21–7.14 (m, 3H, CH), 2.34 (s, 6H, CH<sub>3</sub>). <sup>13</sup>C{<sup>1</sup>H} NMR (CDCl<sub>3</sub>,  $\delta$ ): 168.45, 152.59 (C(=O)-NH-C(=O) and C(=O)-NH-Xyl), 135.50, 133.32, 133.25, 131.99, 128.81, 128.15, 127.90, 127.34 (Ar); 18.53 (CH<sub>3</sub>).

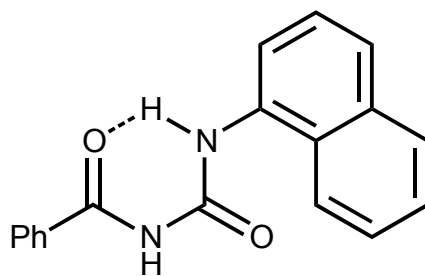

**12.** Yield: 31% (90 mg). Mp: 214–215 °C.  $R_f = 0.40$  (EtOAc/Hexane, 2:8). High resolution ESI<sup>+</sup>-MS (MeOH,  $m/z$ ): 313.0962 ( $[M + Na]^+$ , calcd 313.0947). IR (KBr, selected bands,  $\text{cm}^{-1}$ ): 3202 (m), 3130 (m)  $\nu(\text{N-H})$ ; 3069 (m)  $\nu(\text{C-H})$ ; 1710 (vs), 1671 (s)  $\nu(\text{C=O})$ .  $^1\text{H}$  NMR ( $(\text{CD}_3)_2\text{SO}$   $\delta$ ): 11.11 (s, 1H,  $\text{C(=O)-NH-C(=O)}$ ), 11.05 (s, 1H,  $\text{C(=O)-NH-Nh}$ ), 8.24 (d,  $^4J_{\text{HH}} = 1.3$  Hz, 1H, *CH*), 8.07 (d,  $^3J_{\text{HH}} = 7.4$  Hz, 2H, *CH*), 7.94–7.87 (m, 3H, *CH*), 7.70–7.66 (m, 2H, *CH*), 7.59–7.42 (m, 5H, *CH*).  $^{13}\text{C}\{^1\text{H}\}$  NMR ( $(\text{CD}_3)_2\text{SO}$ ,  $\delta$ ): 169.28, 151.70 ( $\text{C(=O)-NH-C(=O)}$  and  $\text{C(=O)-NH-Nh}$ ), 135.73, 133.91, 133.54, 132.79, 130.47, 129.17, 129.05, 128.80, 127.98, 127.79, 127.04, 125.31, 120.89, 116.35 (Ar).



### Crystal data for 3 and 10

| Identification code                         | <b>3</b>                                                                     | <b>10</b>                                                        |
|---------------------------------------------|------------------------------------------------------------------------------|------------------------------------------------------------------|
| Empirical formula                           | C <sub>15</sub> H <sub>17</sub> F <sub>3</sub> N <sub>2</sub> O <sub>2</sub> | C <sub>15</sub> H <sub>14</sub> N <sub>2</sub> O <sub>2</sub>    |
| Formula weight                              | 314.30                                                                       | 254.28                                                           |
| Temperature/K                               | 100(2)                                                                       | 100(2)                                                           |
| Crystal system                              | triclinic                                                                    | triclinic                                                        |
| Space group                                 | P-1                                                                          | P-1                                                              |
| a/Å                                         | 5.1066(12)                                                                   | 5.3129(5)                                                        |
| b/Å                                         | 11.5568(13)                                                                  | 9.3886(7)                                                        |
| c/Å                                         | 12.7664(13)                                                                  | 12.8335(8)                                                       |
| α/°                                         | 100.531(9)                                                                   | 86.747(5)                                                        |
| β/°                                         | 94.646(14)                                                                   | 88.785(7)                                                        |
| γ/°                                         | 100.547(15)                                                                  | 75.123(8)                                                        |
| Volume/Å <sup>3</sup>                       | 723.1(2)                                                                     | 617.68(9)                                                        |
| Z                                           | 2                                                                            | 2                                                                |
| ρ <sub>calc</sub> /cm <sup>3</sup>          | 1.444                                                                        | 1.367                                                            |
| μ/mm <sup>1</sup>                           | 0.122                                                                        | 0.092                                                            |
| F(000)                                      | 328.0                                                                        | 268.0                                                            |
| Crystal size/mm <sup>3</sup>                | 0.2 × 0.2 × 0.15                                                             | 0.25 × 0.2 × 0.2                                                 |
| Radiation                                   | MoKα (λ = 0.71073)                                                           | MoKα (λ = 0.71073)                                               |
| 2θ range for data collection/°              | 6.538 to 54.994                                                              | 5.366 to 54.964                                                  |
| Index ranges                                | -6 ≤ h ≤ 6,<br>-15 ≤ k ≤ 14,<br>-15 ≤ l ≤ 16                                 | -6 ≤ h ≤ 6,<br>-12 ≤ k ≤ 12,<br>-16 ≤ l ≤ 13                     |
| Reflections collected                       | 6124                                                                         | 5736                                                             |
| Independent reflections                     | 3326 [R <sub>int</sub> = 0.0338,<br>R <sub>sigma</sub> = 0.0486]             | 2821 [R <sub>int</sub> = 0.0269,<br>R <sub>sigma</sub> = 0.0459] |
| Data/restraints/parameters                  | 3326/0/199                                                                   | 2821/0/172                                                       |
| Goodness-of-fit on F <sup>2</sup>           | 1.064                                                                        | 1.027                                                            |
| Final R indexes [I ≥ 2σ (I)]                | R <sub>1</sub> = 0.0464, wR <sub>2</sub> = 0.1157                            | R <sub>1</sub> = 0.0419, wR <sub>2</sub> = 0.0923                |
| Final R indexes [all data]                  | R <sub>1</sub> = 0.0619, wR <sub>2</sub> = 0.1328                            | R <sub>1</sub> = 0.0580, wR <sub>2</sub> = 0.1036                |
| Largest diff. peak/hole / e Å <sup>-3</sup> | 0.31/-0.33                                                                   | 0.25/-0.28                                                       |
| <b>CCDC number</b>                          | <b>1938714</b>                                                               | <b>1938715</b>                                                   |

## Spectra of 1–12

### Acquisition Parameter

|             |            |                      |          |                  |           |
|-------------|------------|----------------------|----------|------------------|-----------|
| Source Type | ESI        | Ion Polarity         | Positive | Set Nebulizer    | 0.4 Bar   |
| Focus       | Not active |                      |          | Set Dry Heater   | 180 °C    |
| Scan Begin  | 50 m/z     | Set Capillary        | 4500 V   | Set Dry Gas      | 4.0 l/min |
| Scan End    | 3000 m/z   | Set End Plate Offset | -500 V   | Set Divert Valve | Source    |

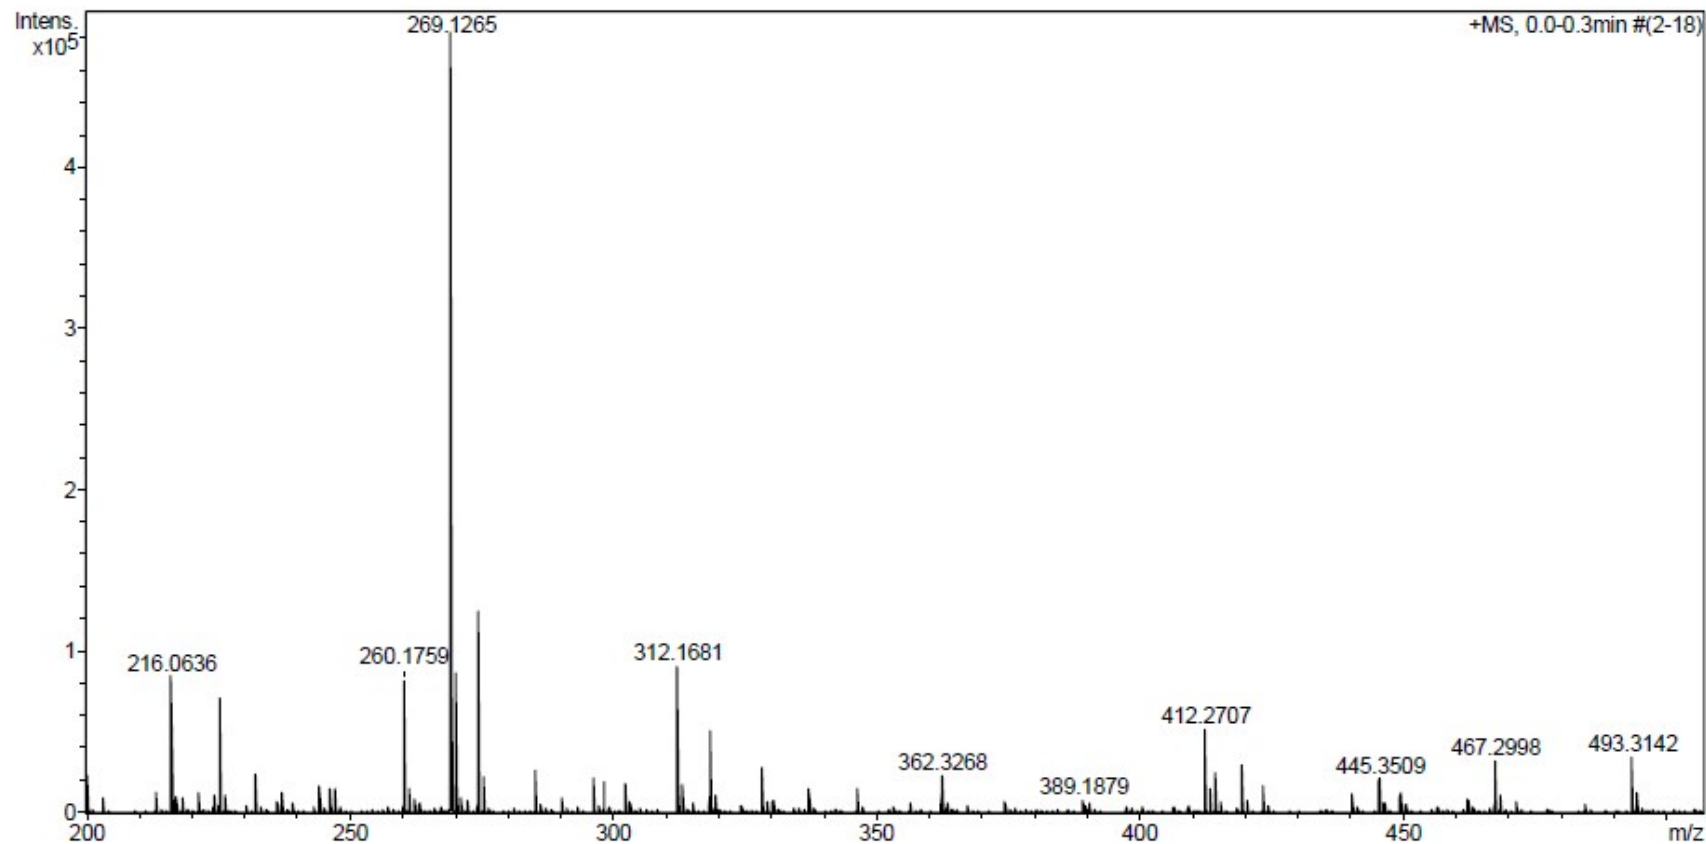

Figure 33S. HRESI<sup>+</sup>-MS of 1.

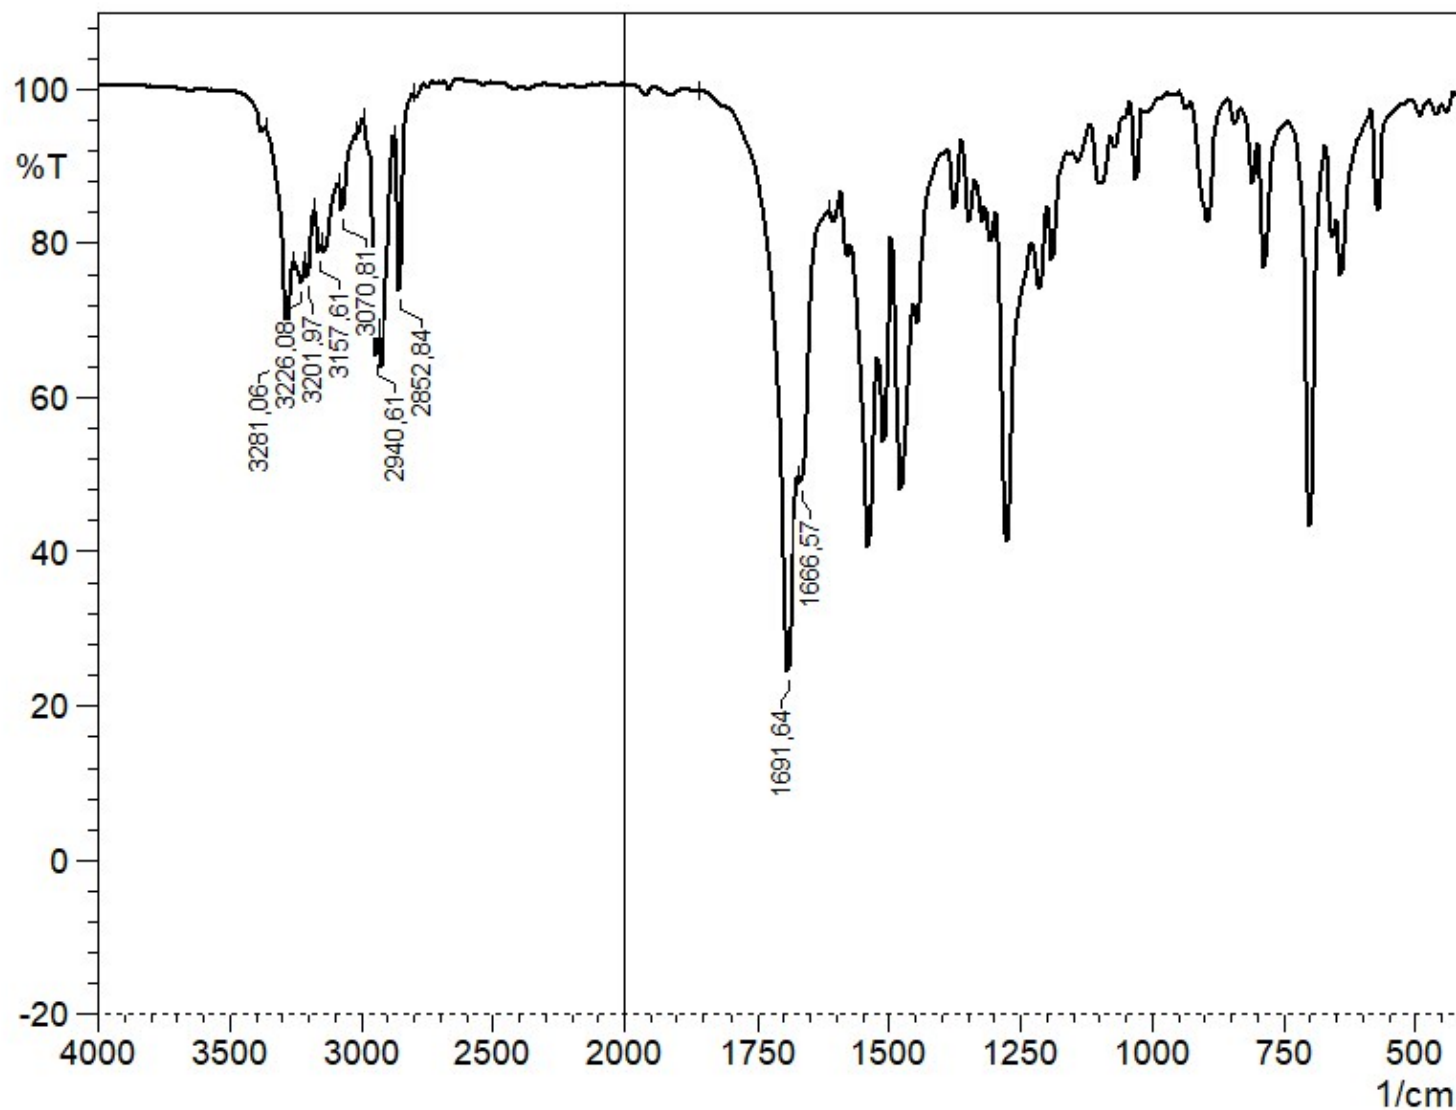

Figure 34S. IR spectrum of 1.

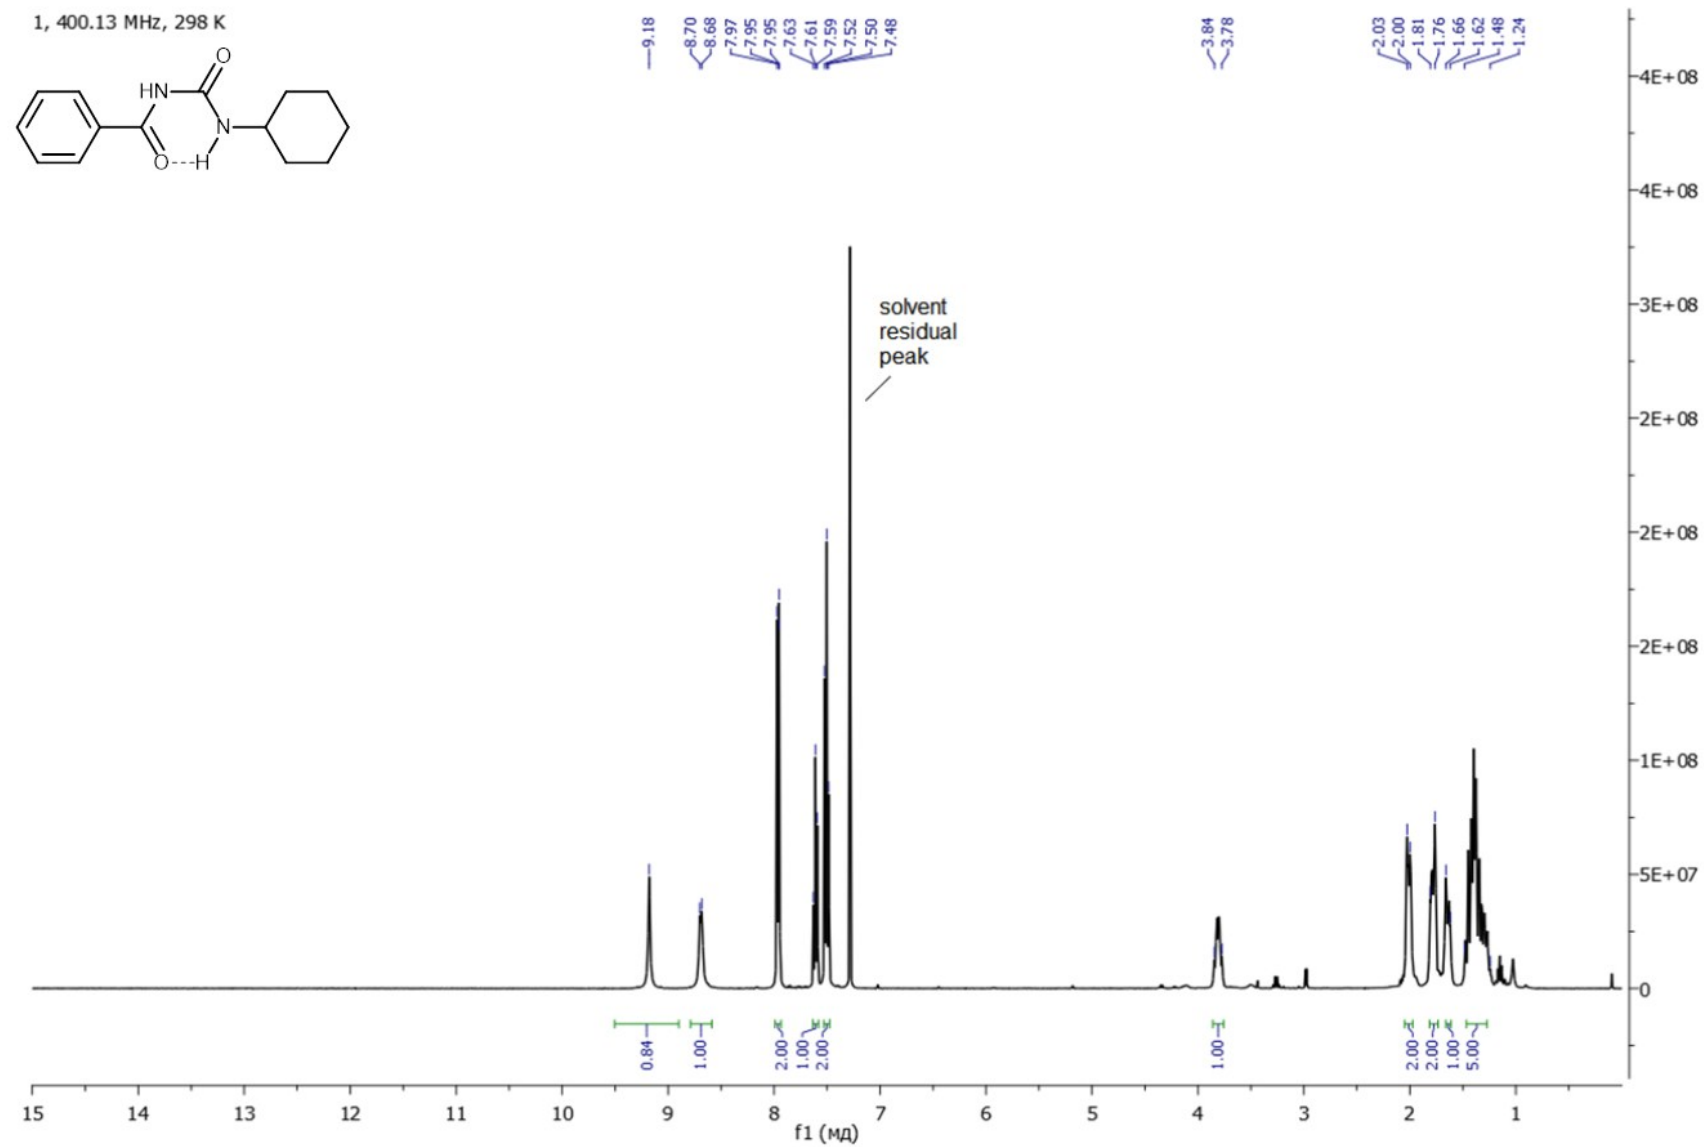

Figure 35S.  $^1\text{H}$  NMR spectrum of 1.

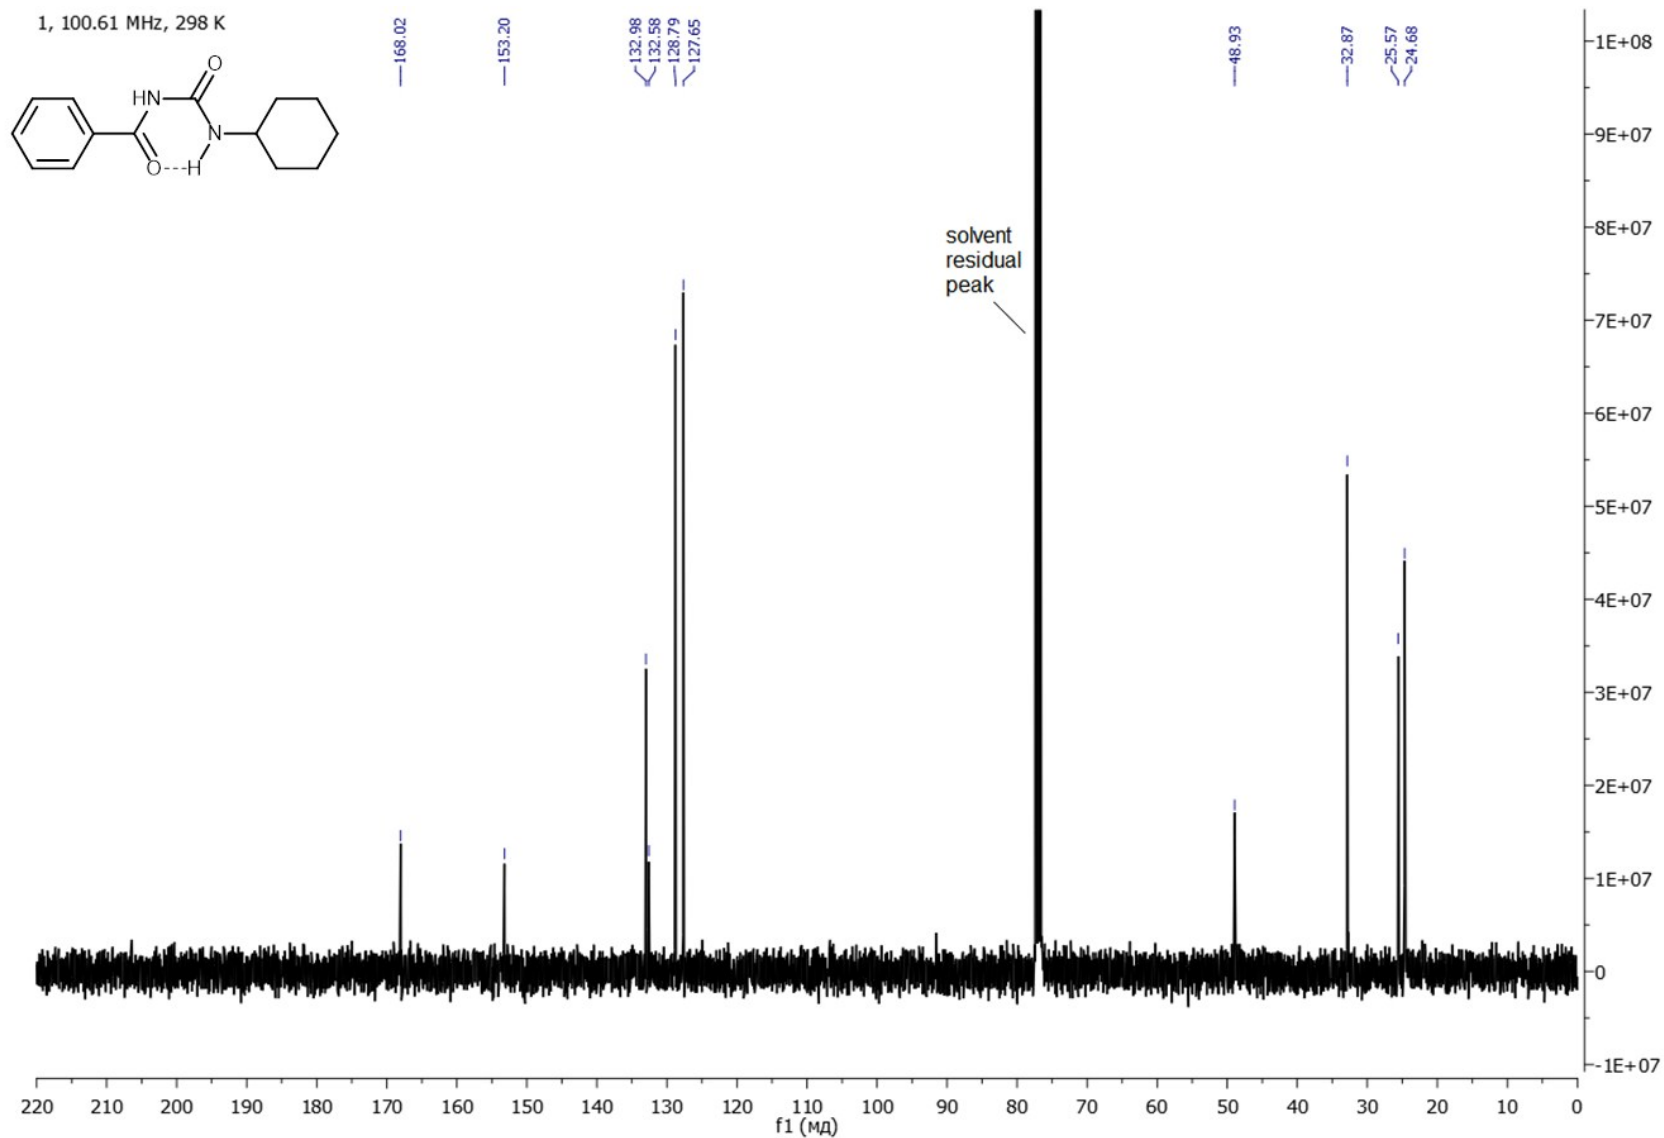

**Figure 36S.**  $^{13}\text{C}\{^1\text{H}\}$  NMR spectrum of **1**.

**Acquisition Parameter**

|             |            |                      |          |                  |           |
|-------------|------------|----------------------|----------|------------------|-----------|
| Source Type | ESI        | Ion Polarity         | Positive | Set Nebulizer    | 0.4 Bar   |
| Focus       | Not active |                      |          | Set Dry Heater   | 180 °C    |
| Scan Begin  | 50 m/z     | Set Capillary        | 4500 V   | Set Dry Gas      | 4.0 l/min |
| Scan End    | 3000 m/z   | Set End Plate Offset | -500 V   | Set Divert Valve | Source    |

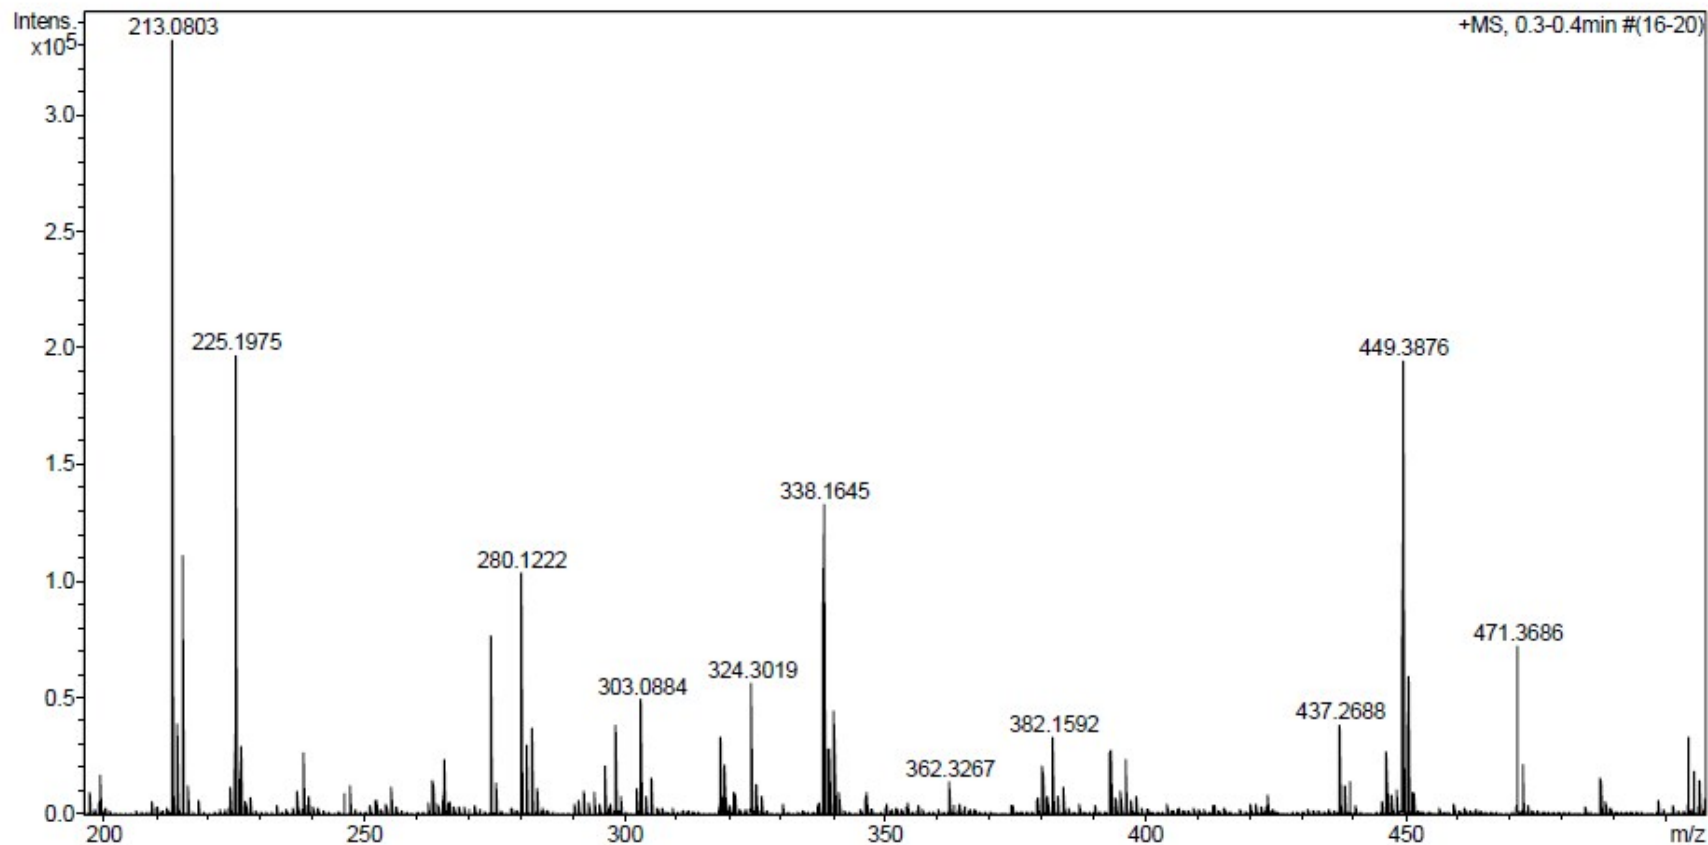

Figure 37S. HRESI<sup>+</sup>-MS of 2.

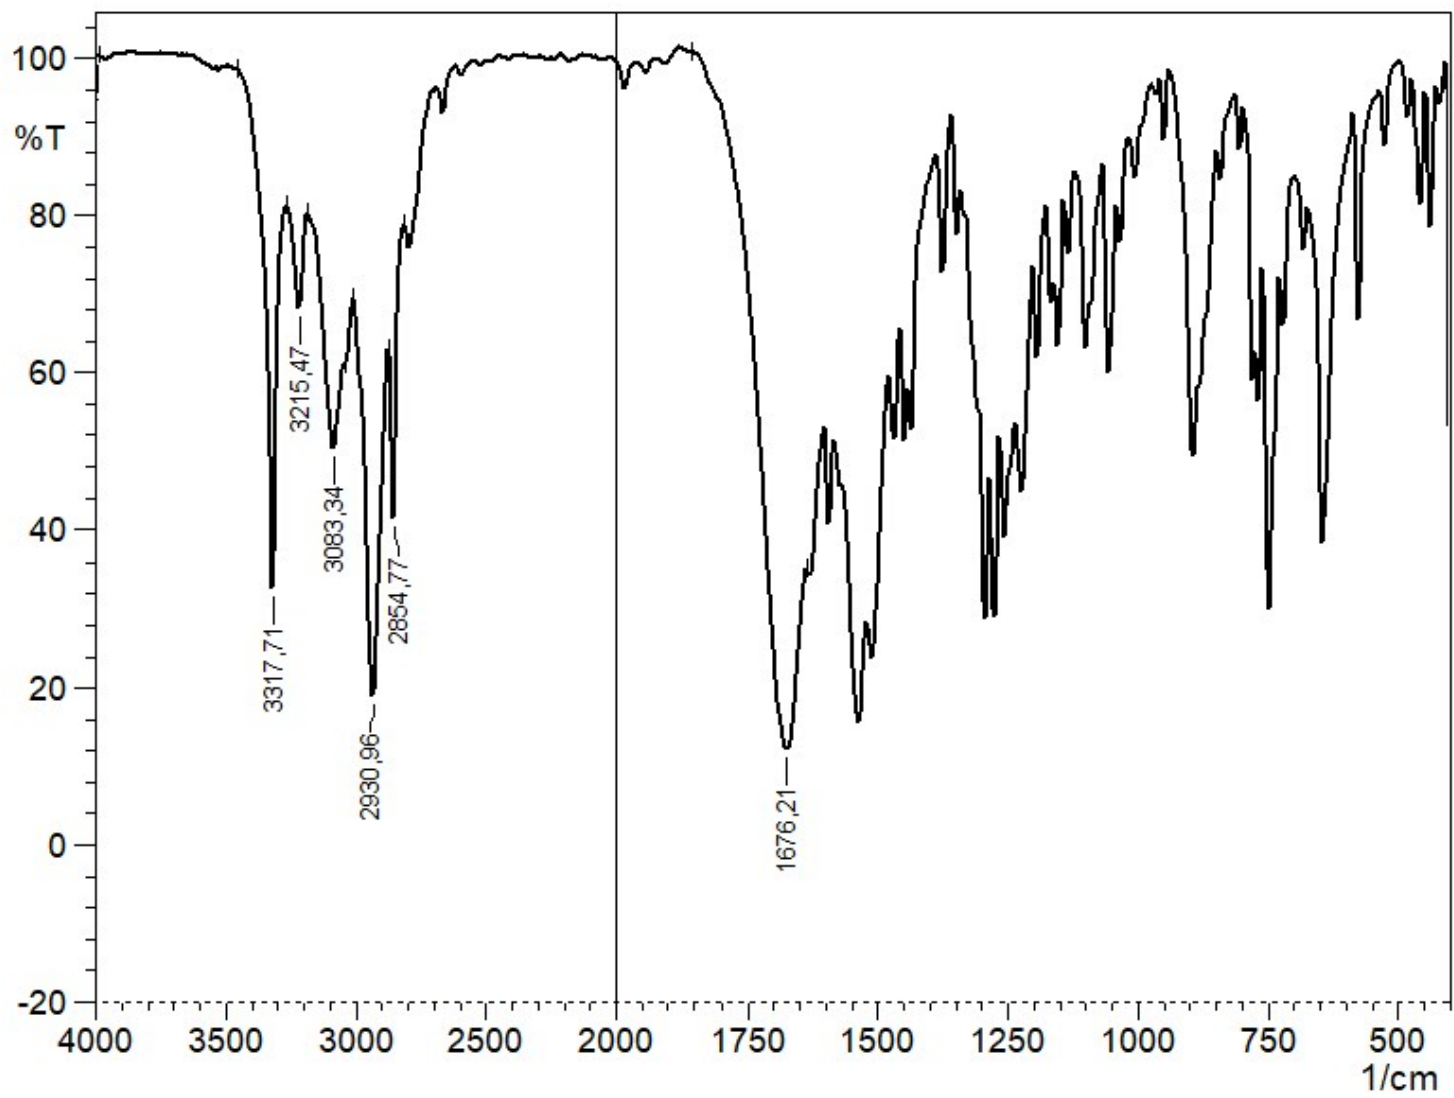

Figure 38S. IR spectrum of 2.

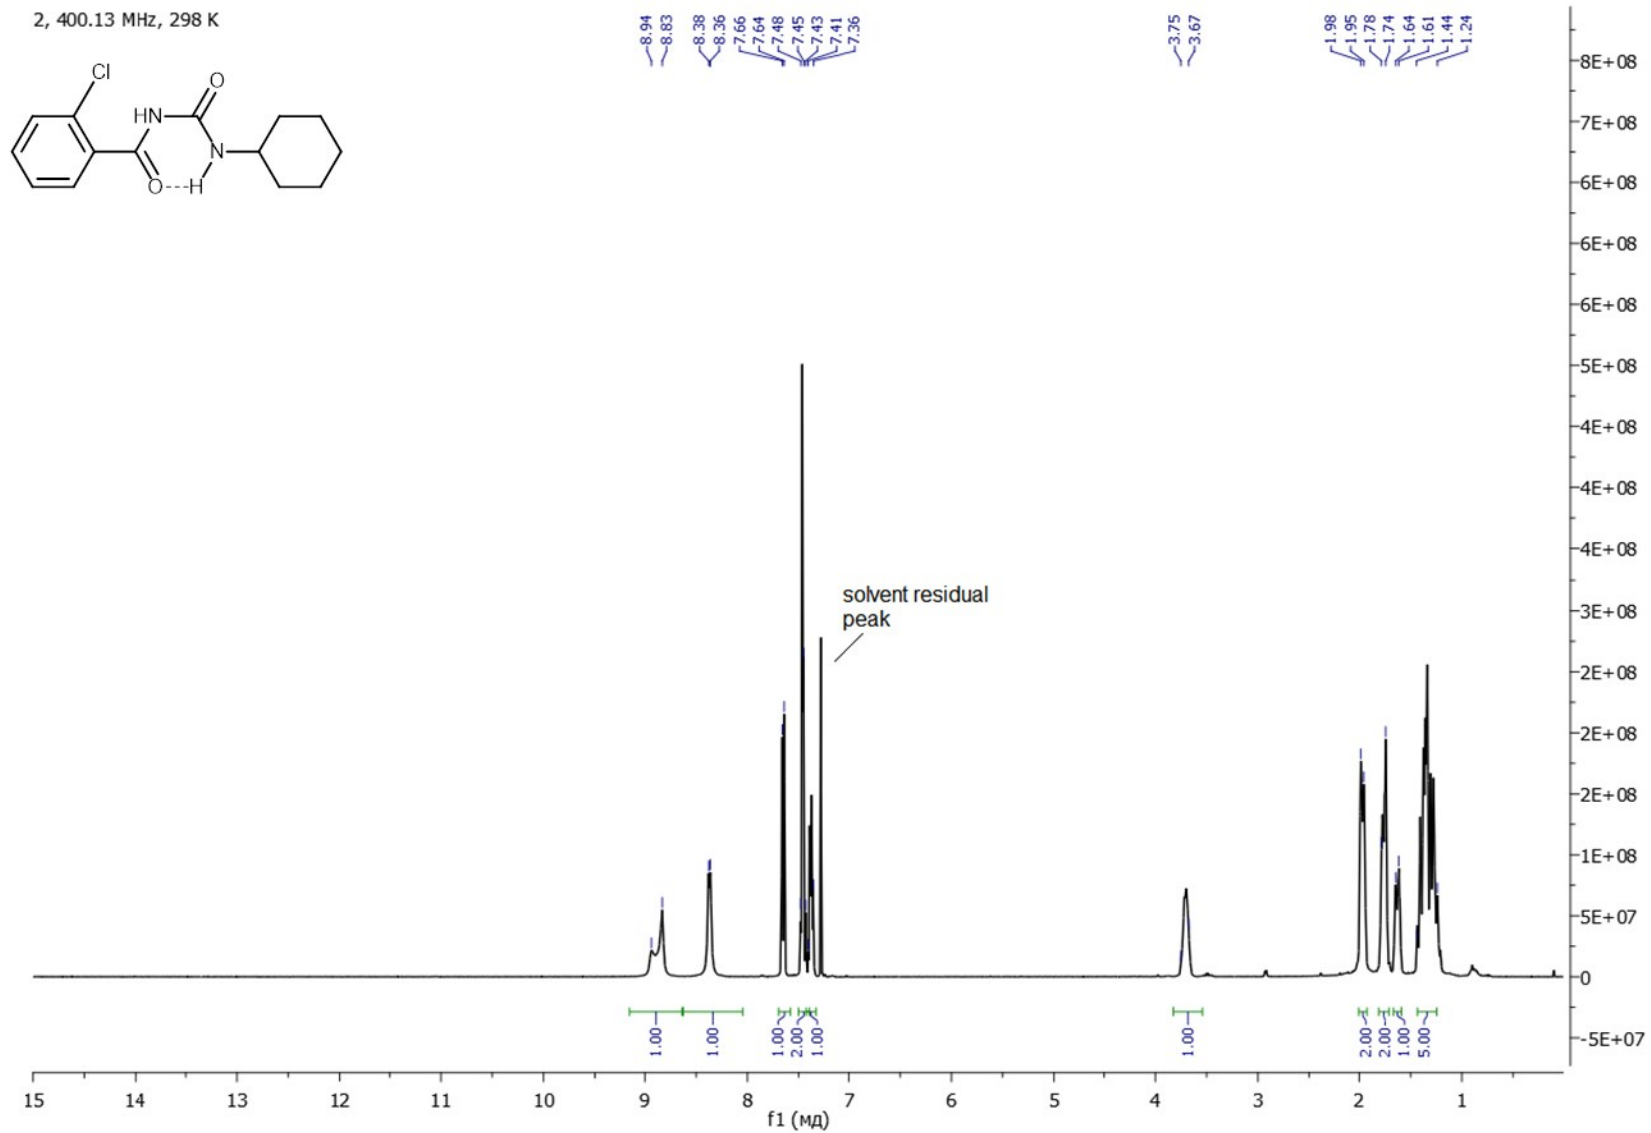

Figure 39S.  $^1\text{H}$  NMR spectrum of 2.



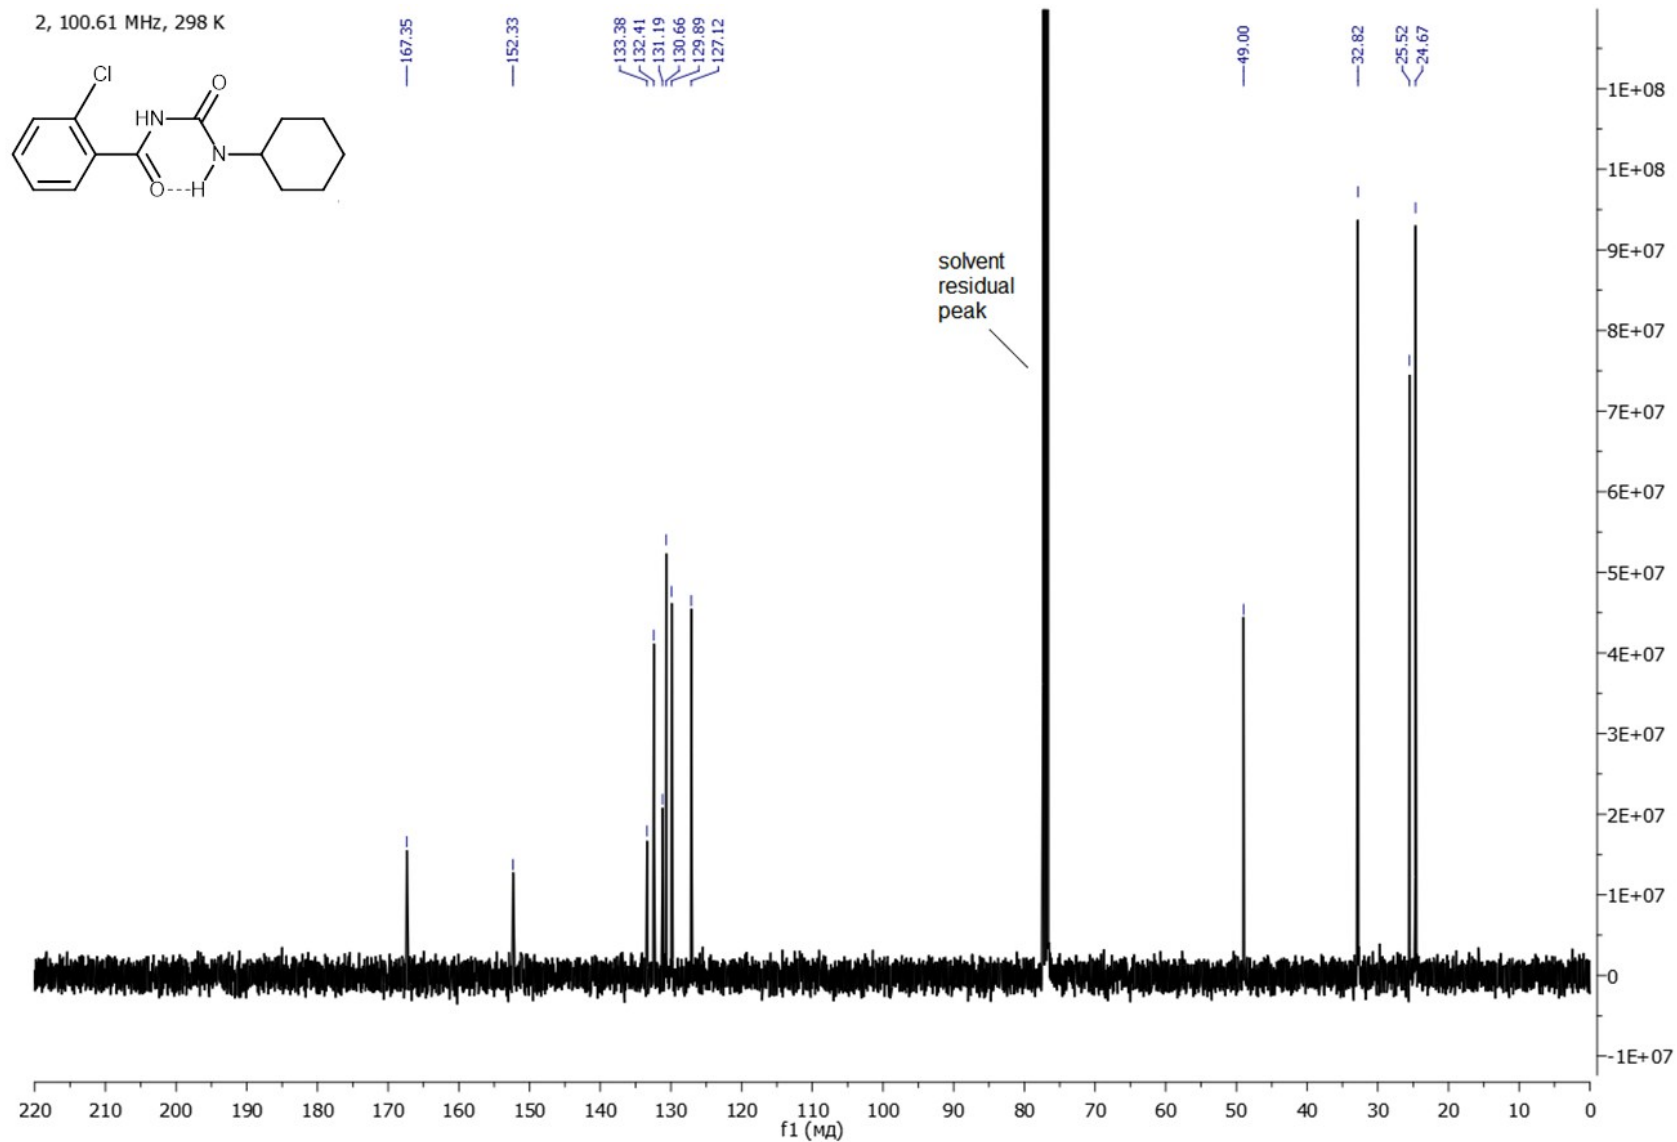

Figure 40S.  $^{13}\text{C}\{^1\text{H}\}$  NMR spectrum of 2.

**Acquisition Parameter**

|             |            |                      |          |                  |           |
|-------------|------------|----------------------|----------|------------------|-----------|
| Source Type | ESI        | Ion Polarity         | Positive | Set Nebulizer    | 0.4 Bar   |
| Focus       | Not active |                      |          | Set Dry Heater   | 180 °C    |
| Scan Begin  | 50 m/z     | Set Capillary        | 4500 V   | Set Dry Gas      | 4.0 l/min |
| Scan End    | 3000 m/z   | Set End Plate Offset | -500 V   | Set Divert Valve | Source    |

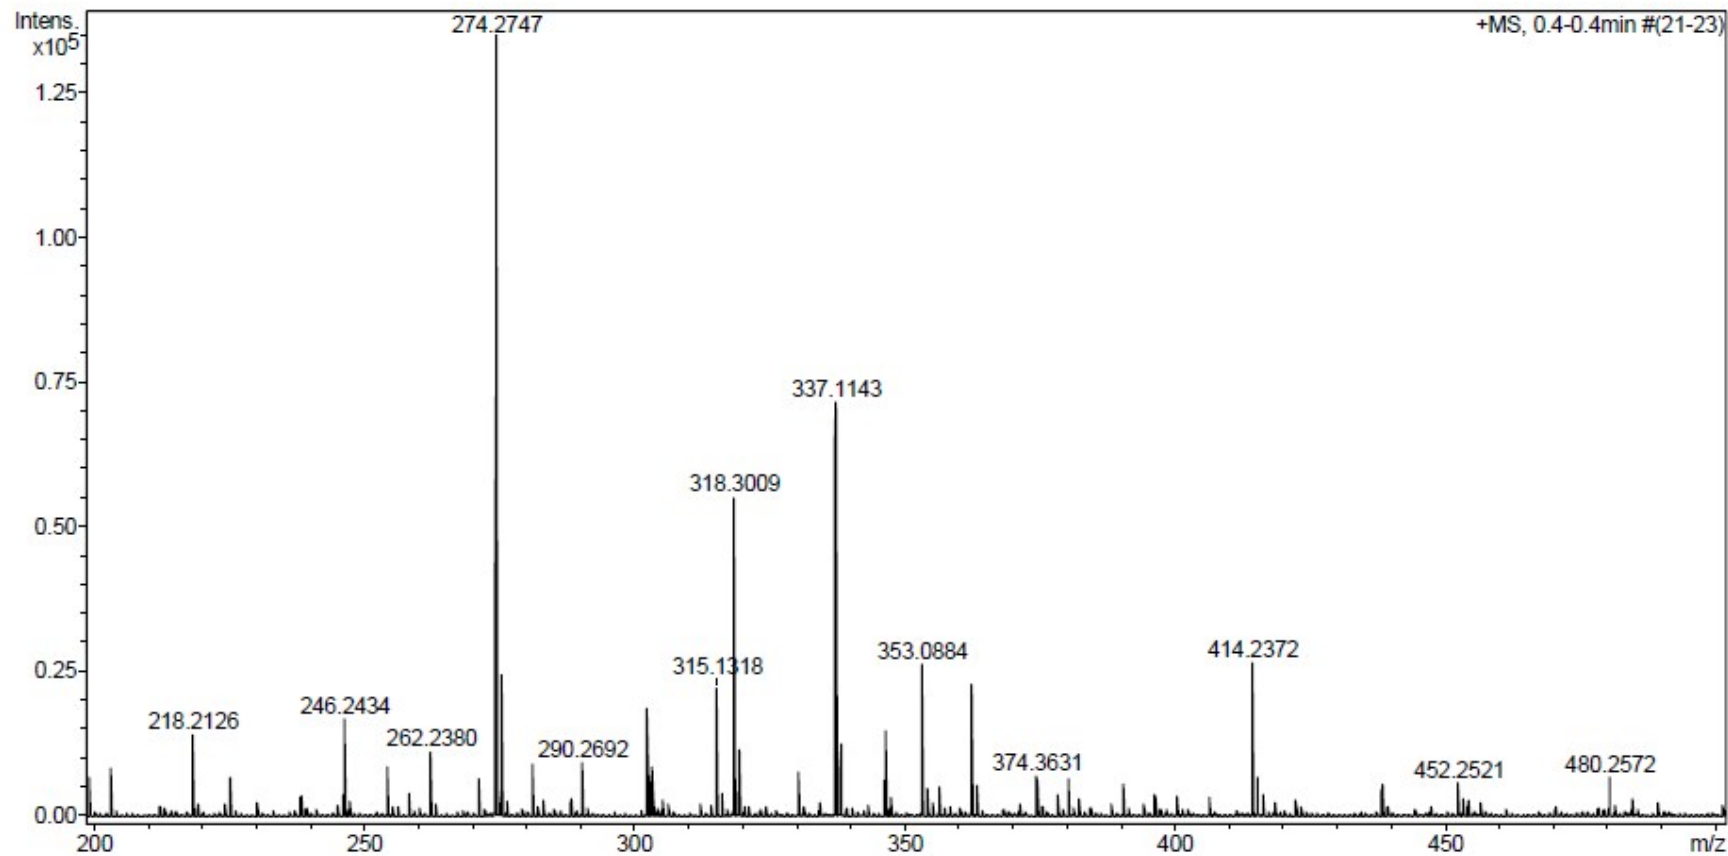

**Figure 41S.** HRESI<sup>+</sup>-MS of 3.

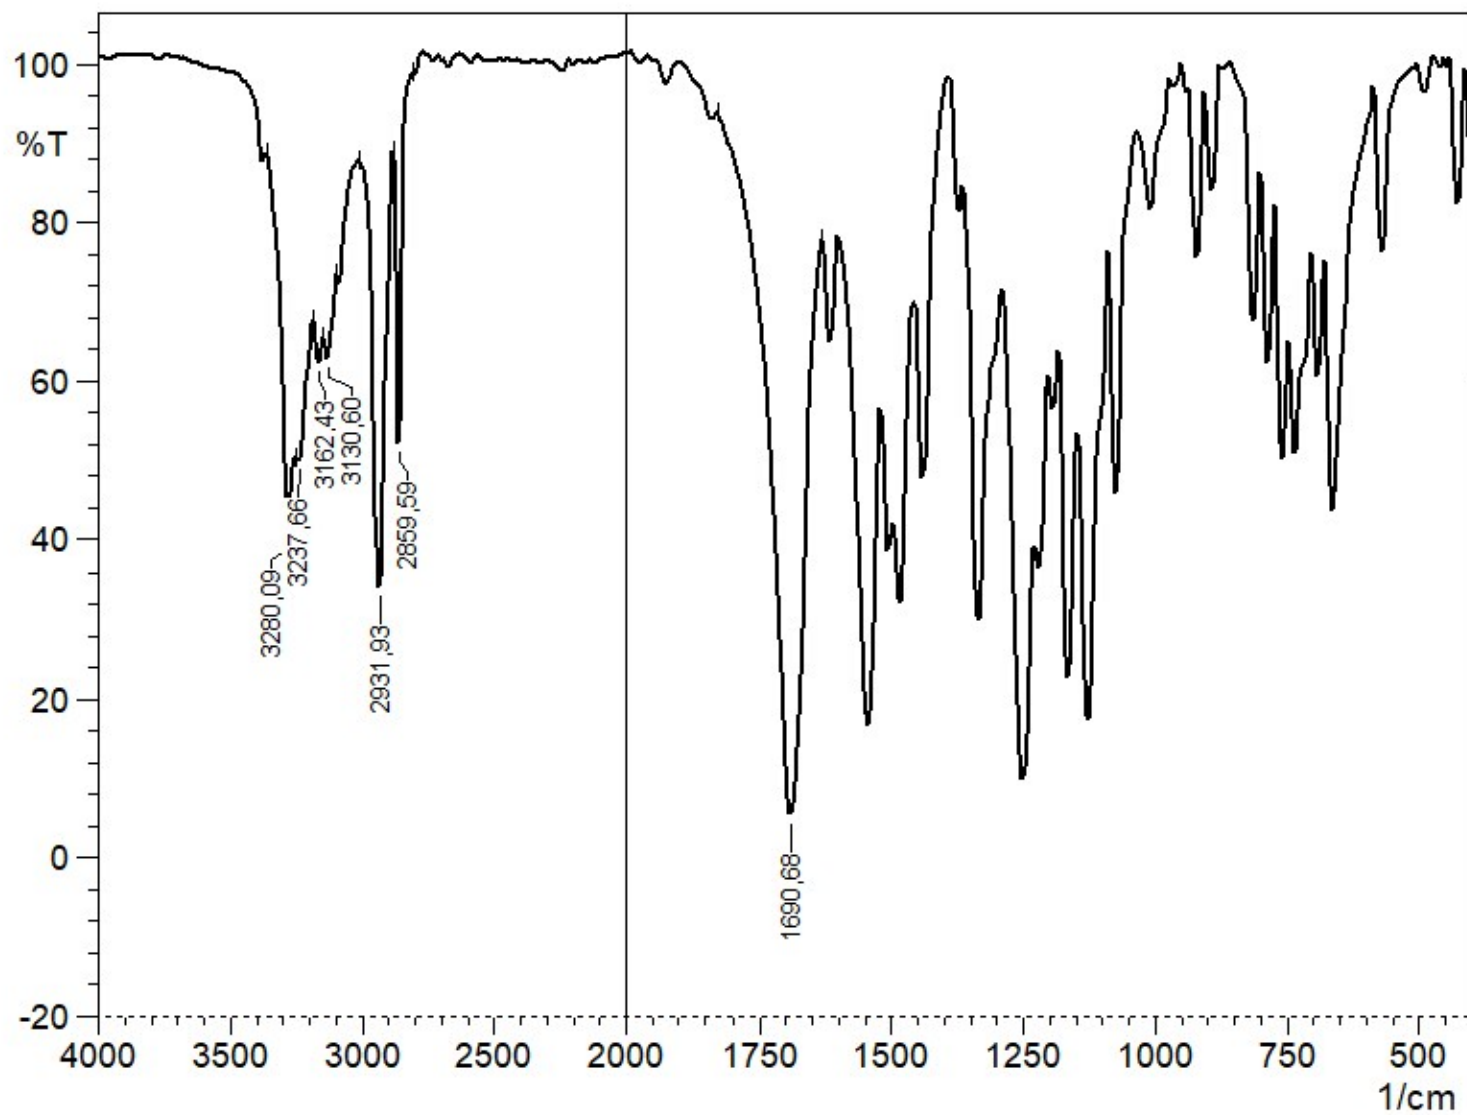

Figure 42S. IR spectrum of 3.

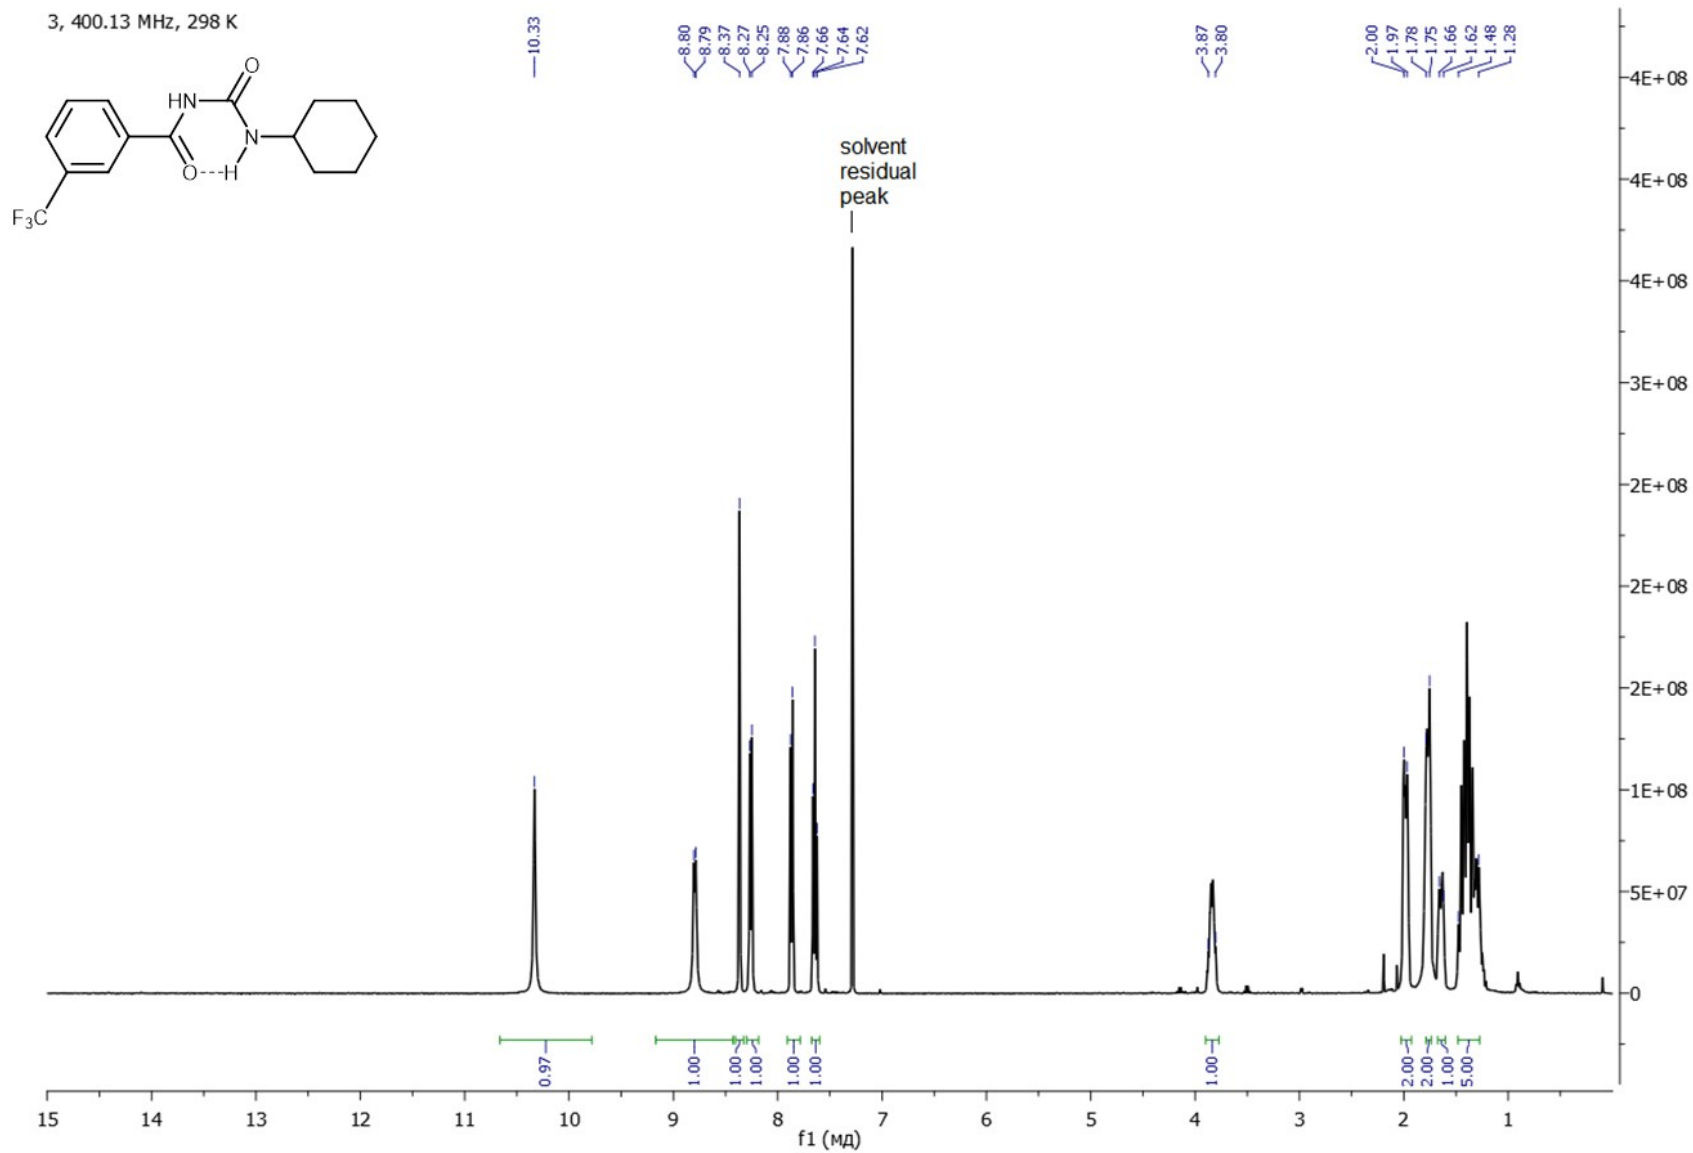

Figure 43S.  $^1\text{H}$  NMR spectrum of 3.

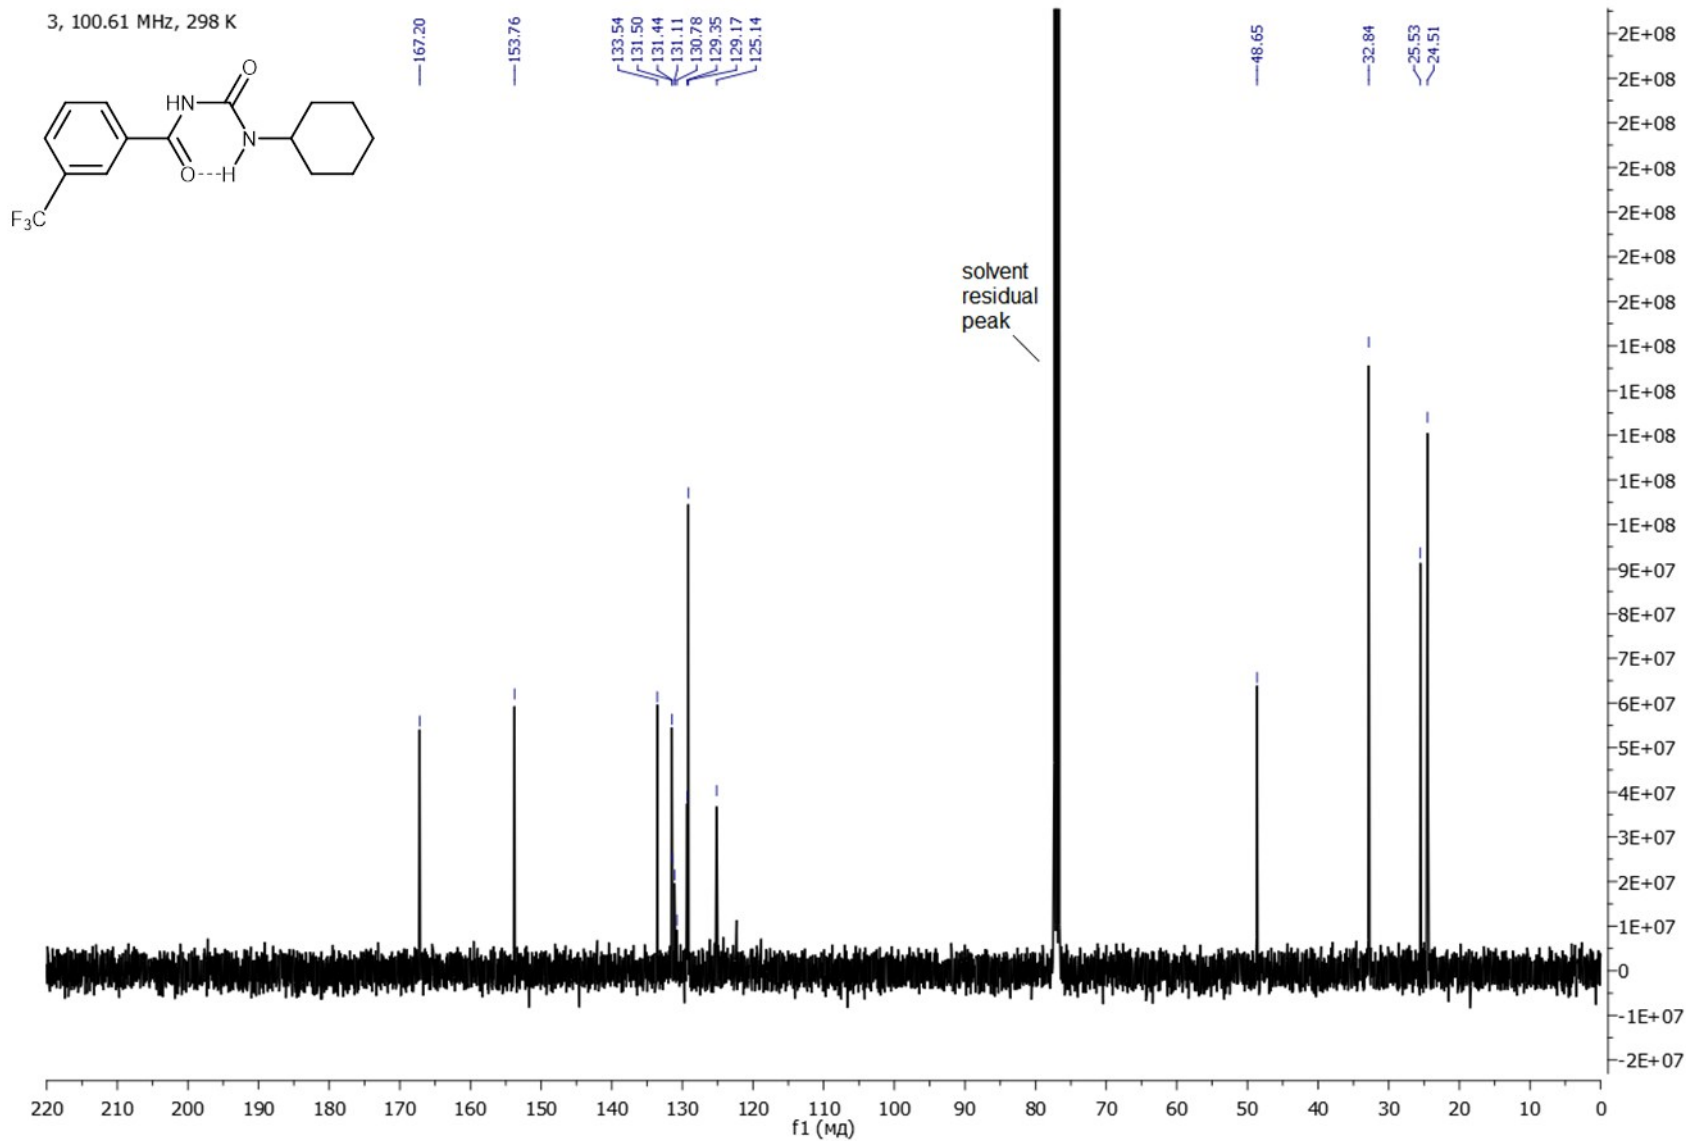

Figure 44S.  $^{13}\text{C}\{^1\text{H}\}$  NMR spectrum of **3**.

**Acquisition Parameter**

|             |            |                      |          |                  |           |
|-------------|------------|----------------------|----------|------------------|-----------|
| Source Type | ESI        | Ion Polarity         | Positive | Set Nebulizer    | 0.4 Bar   |
| Focus       | Not active |                      |          | Set Dry Heater   | 180 °C    |
| Scan Begin  | 50 m/z     | Set Capillary        | 4500 V   | Set Dry Gas      | 4.0 l/min |
| Scan End    | 3000 m/z   | Set End Plate Offset | -500 V   | Set Divert Valve | Source    |

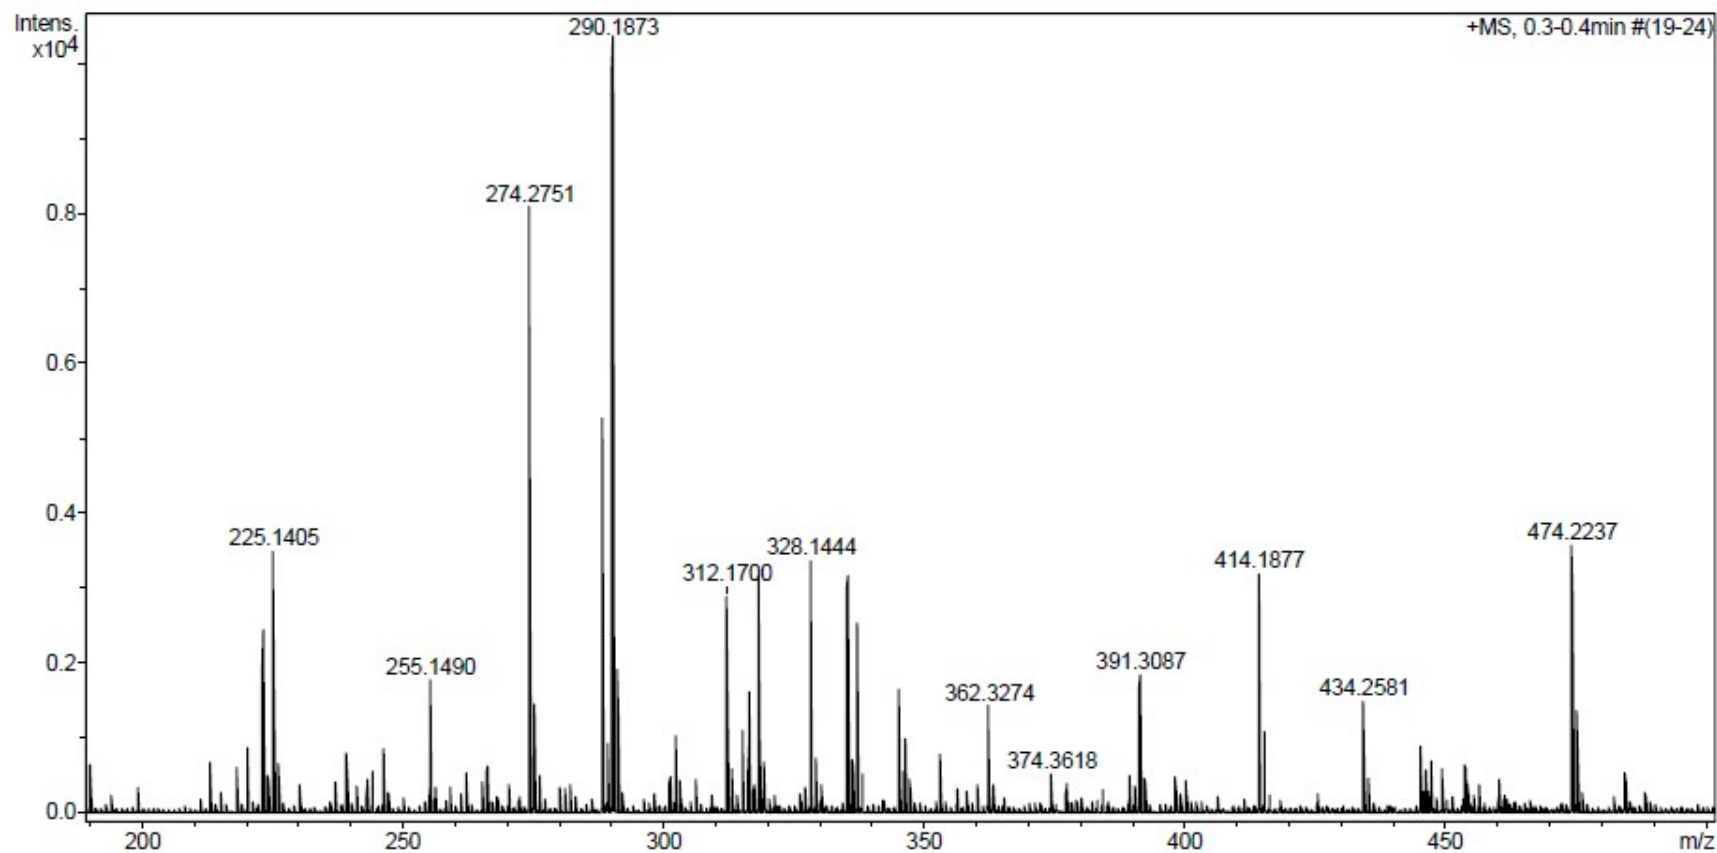

**Figure 45S.** HRESI<sup>+</sup>-MS of 4.

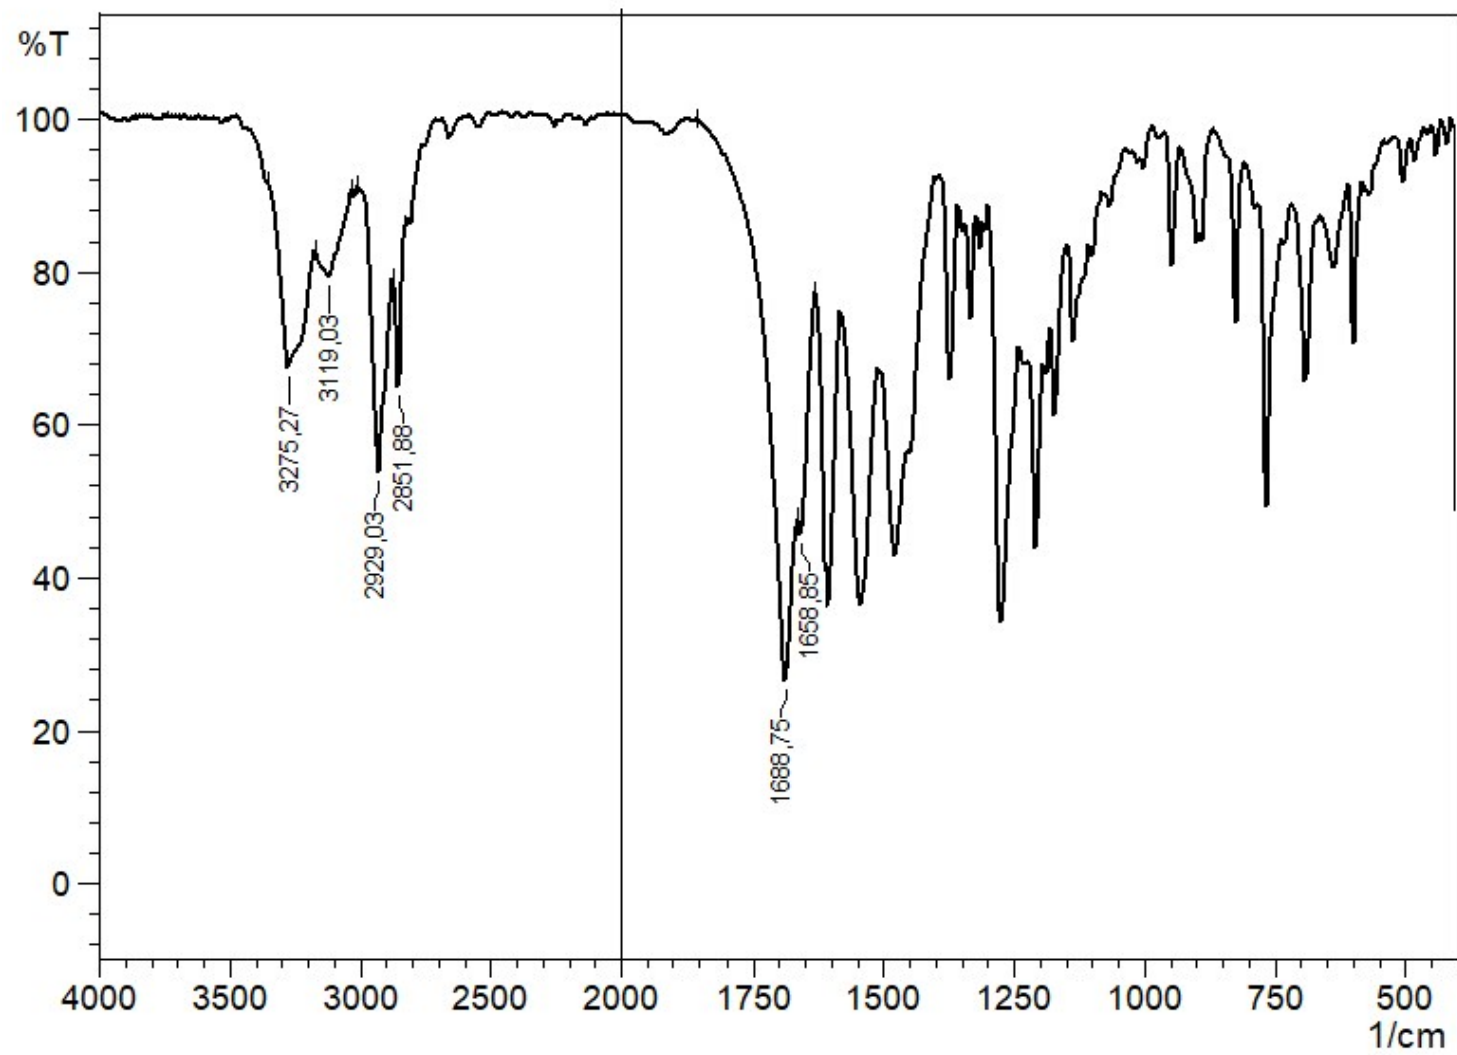

Figure 46S. IR spectrum of 4.

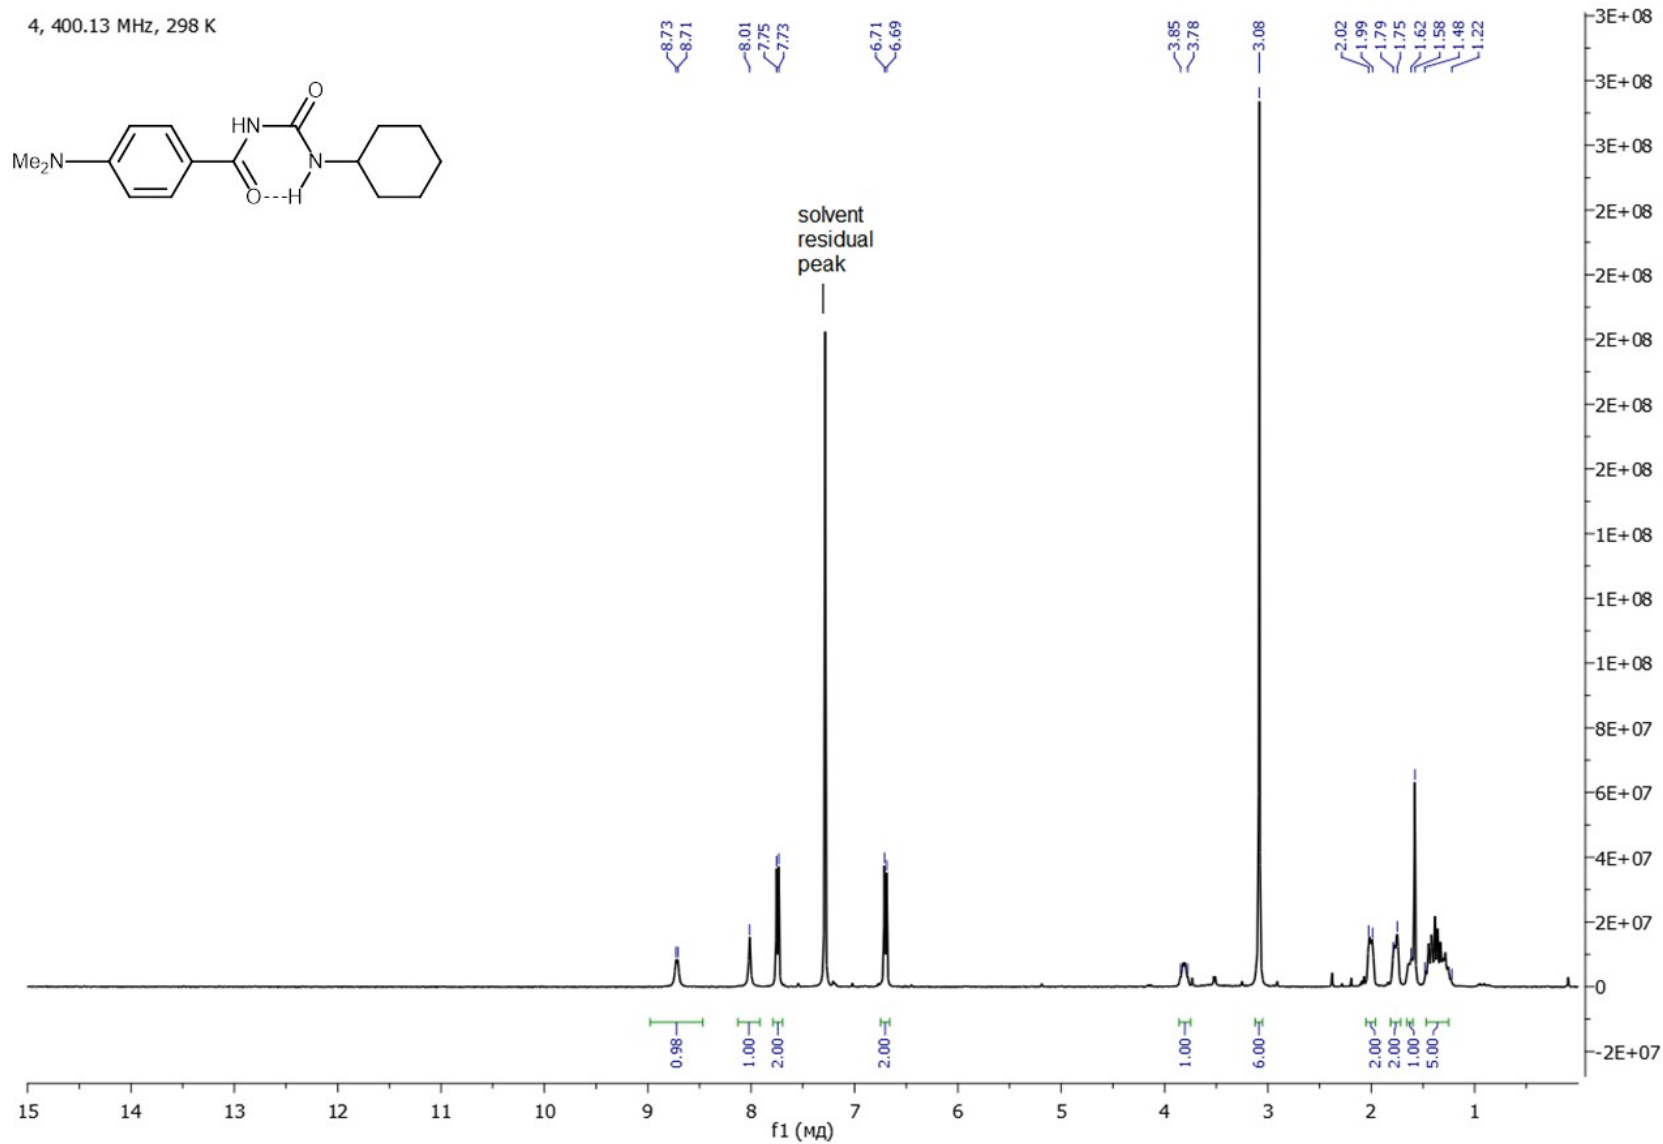

Figure 47S. <sup>1</sup>H NMR spectrum of 4.



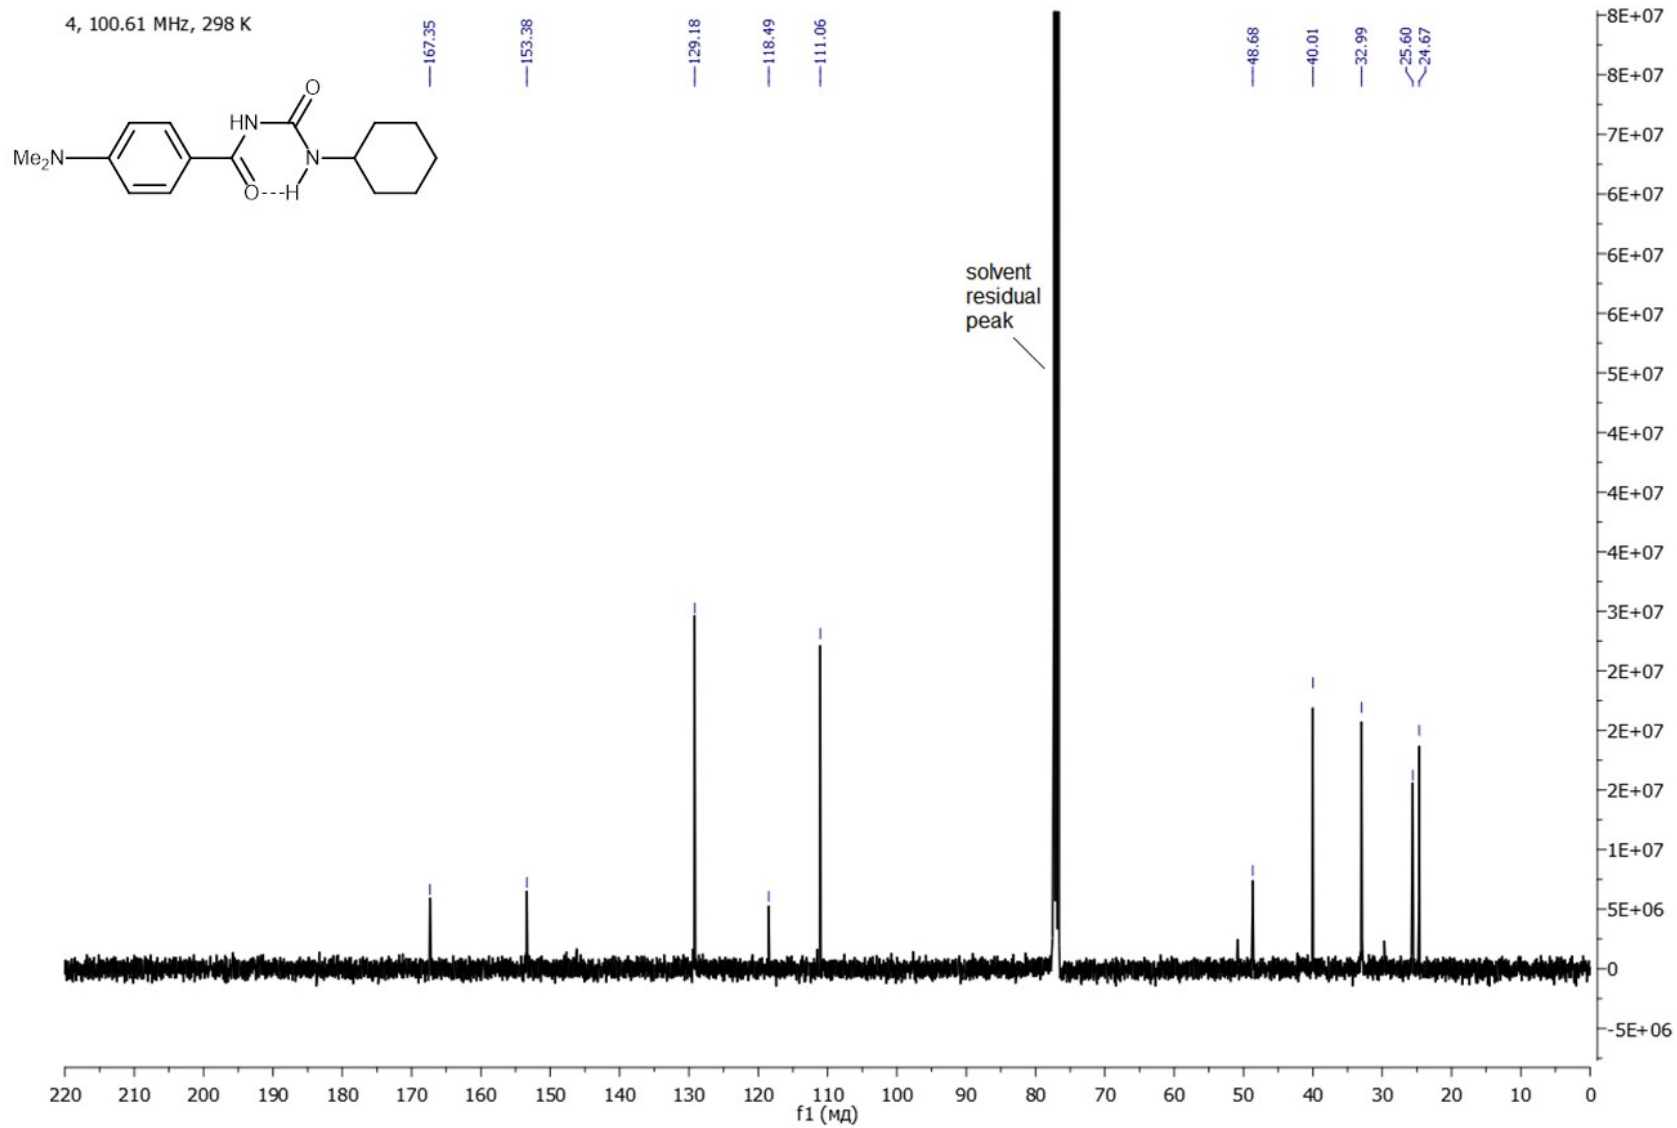

Figure 48S.  $^{13}\text{C}\{^1\text{H}\}$  NMR spectrum of 4.

| Acquisition Parameter |            |                      |          |                  |           |
|-----------------------|------------|----------------------|----------|------------------|-----------|
| Source Type           | ESI        | Ion Polarity         | Positive | Set Nebulizer    | 0.4 Bar   |
| Focus                 | Not active |                      |          | Set Dry Heater   | 180 °C    |
| Scan Begin            | 50 m/z     | Set Capillary        | 4500 V   | Set Dry Gas      | 4.0 l/min |
| Scan End              | 3000 m/z   | Set End Plate Offset | -500 V   | Set Divert Valve | Source    |

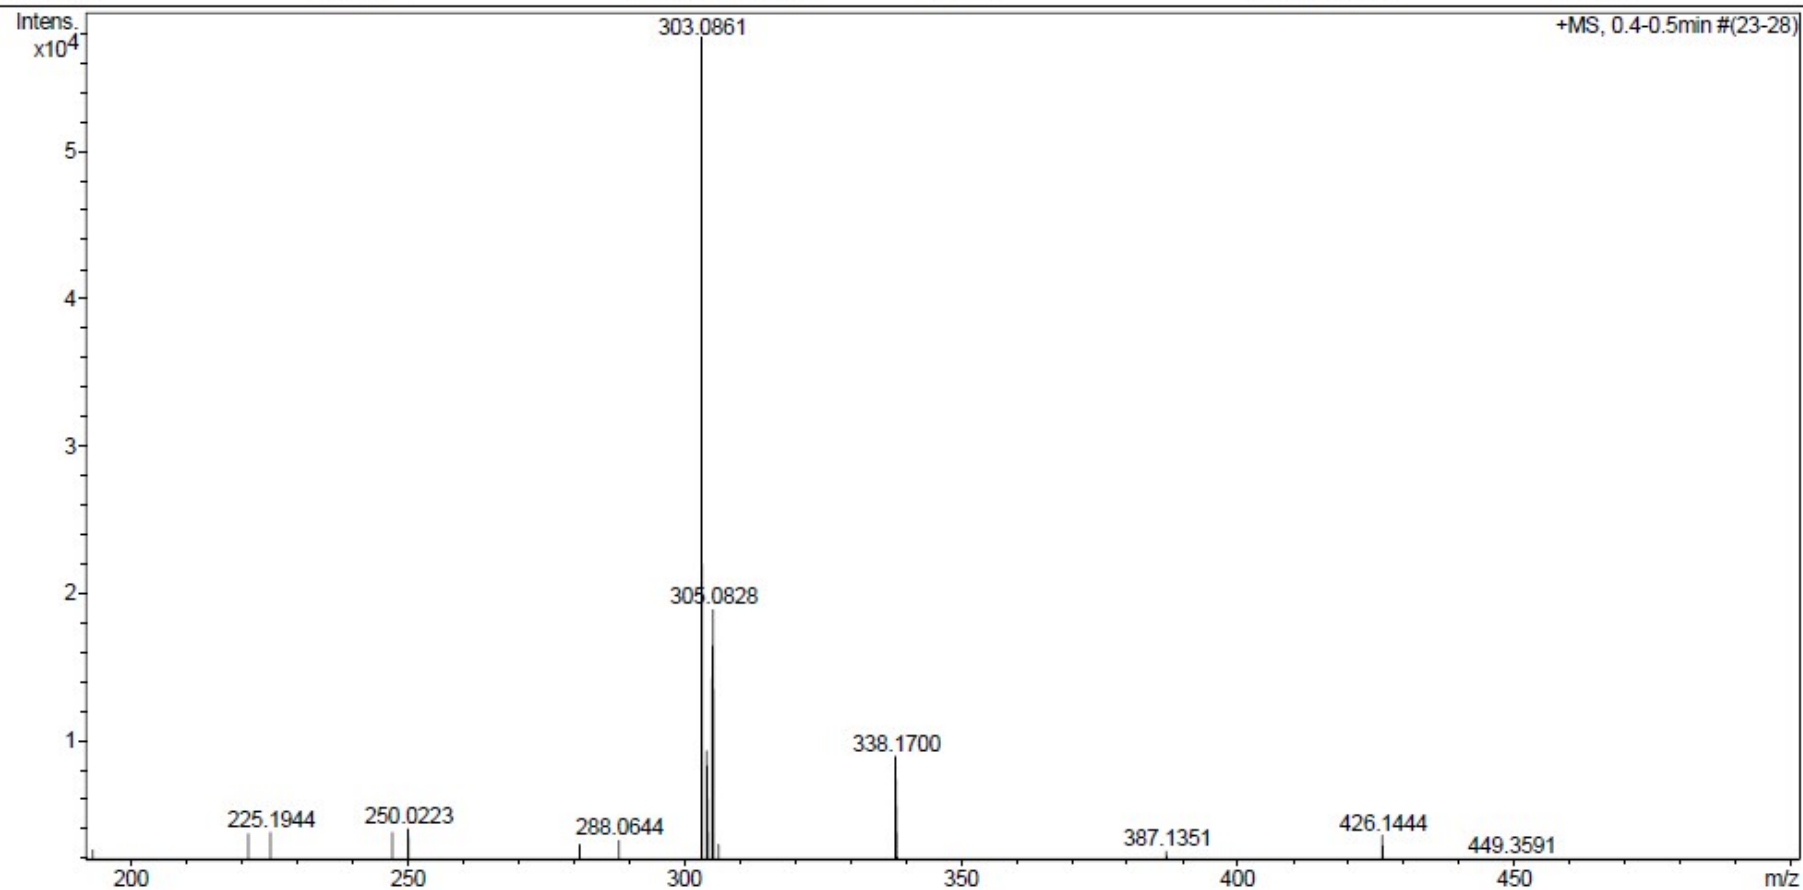

Figure 49S. HRESI<sup>+</sup>-MS of 5.

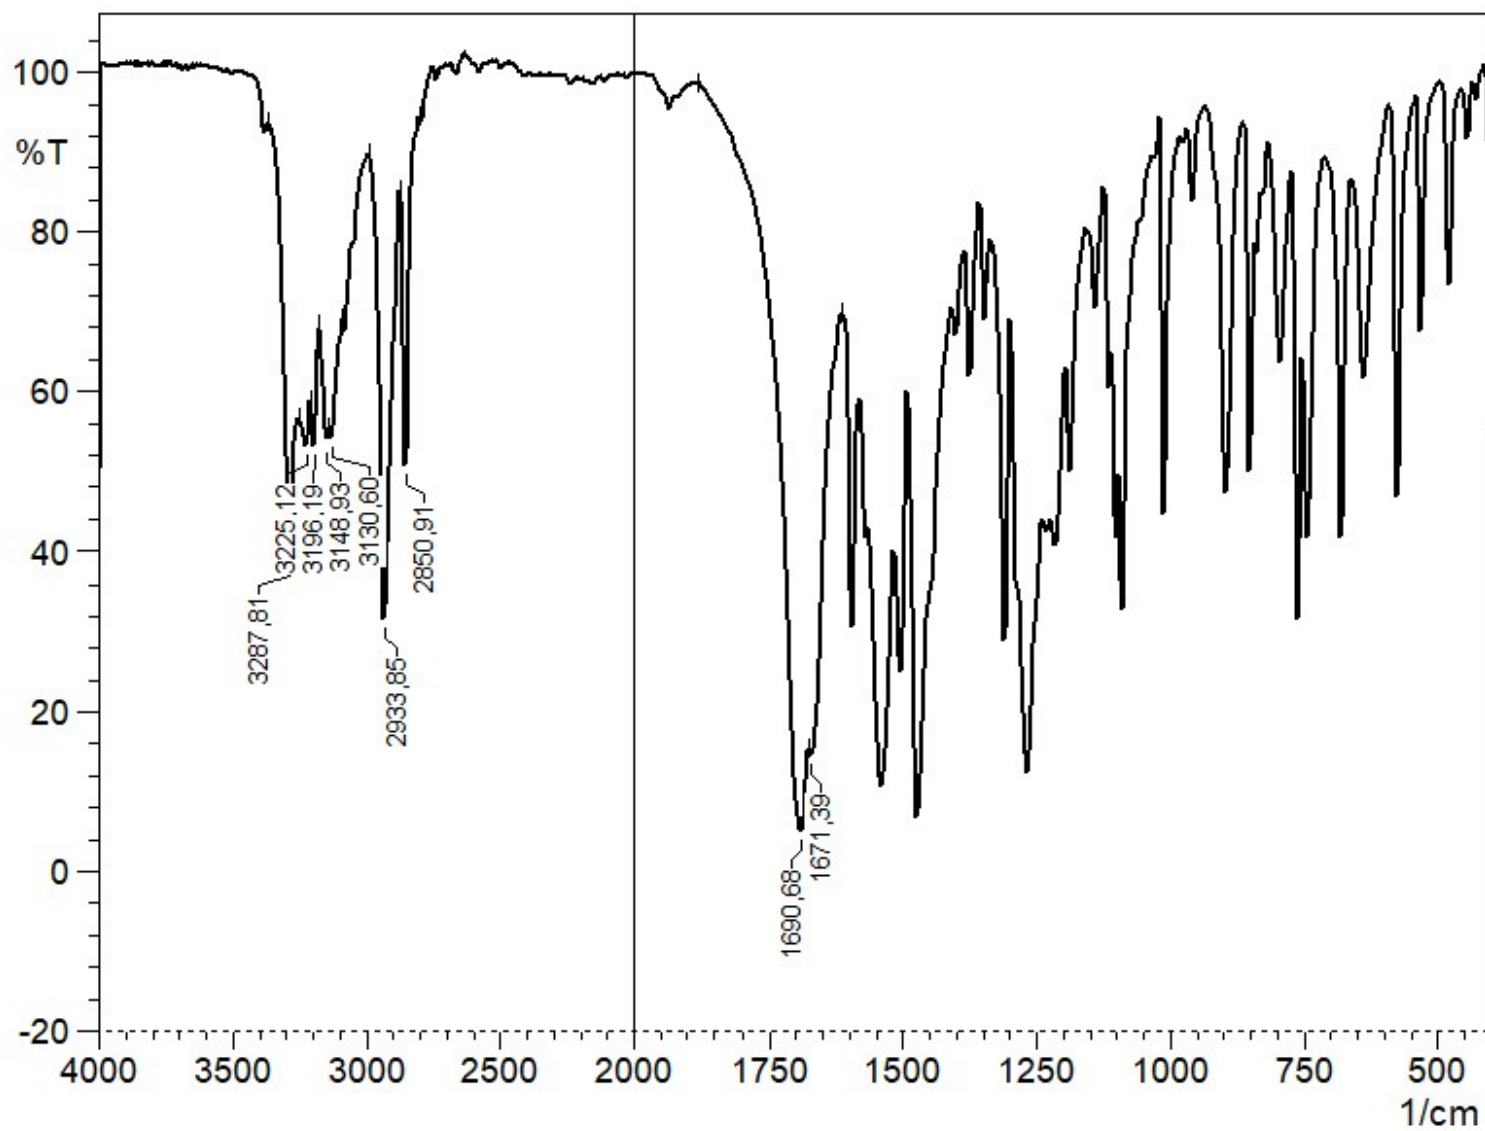

**Figure 50S.** IR spectrum of **5**.

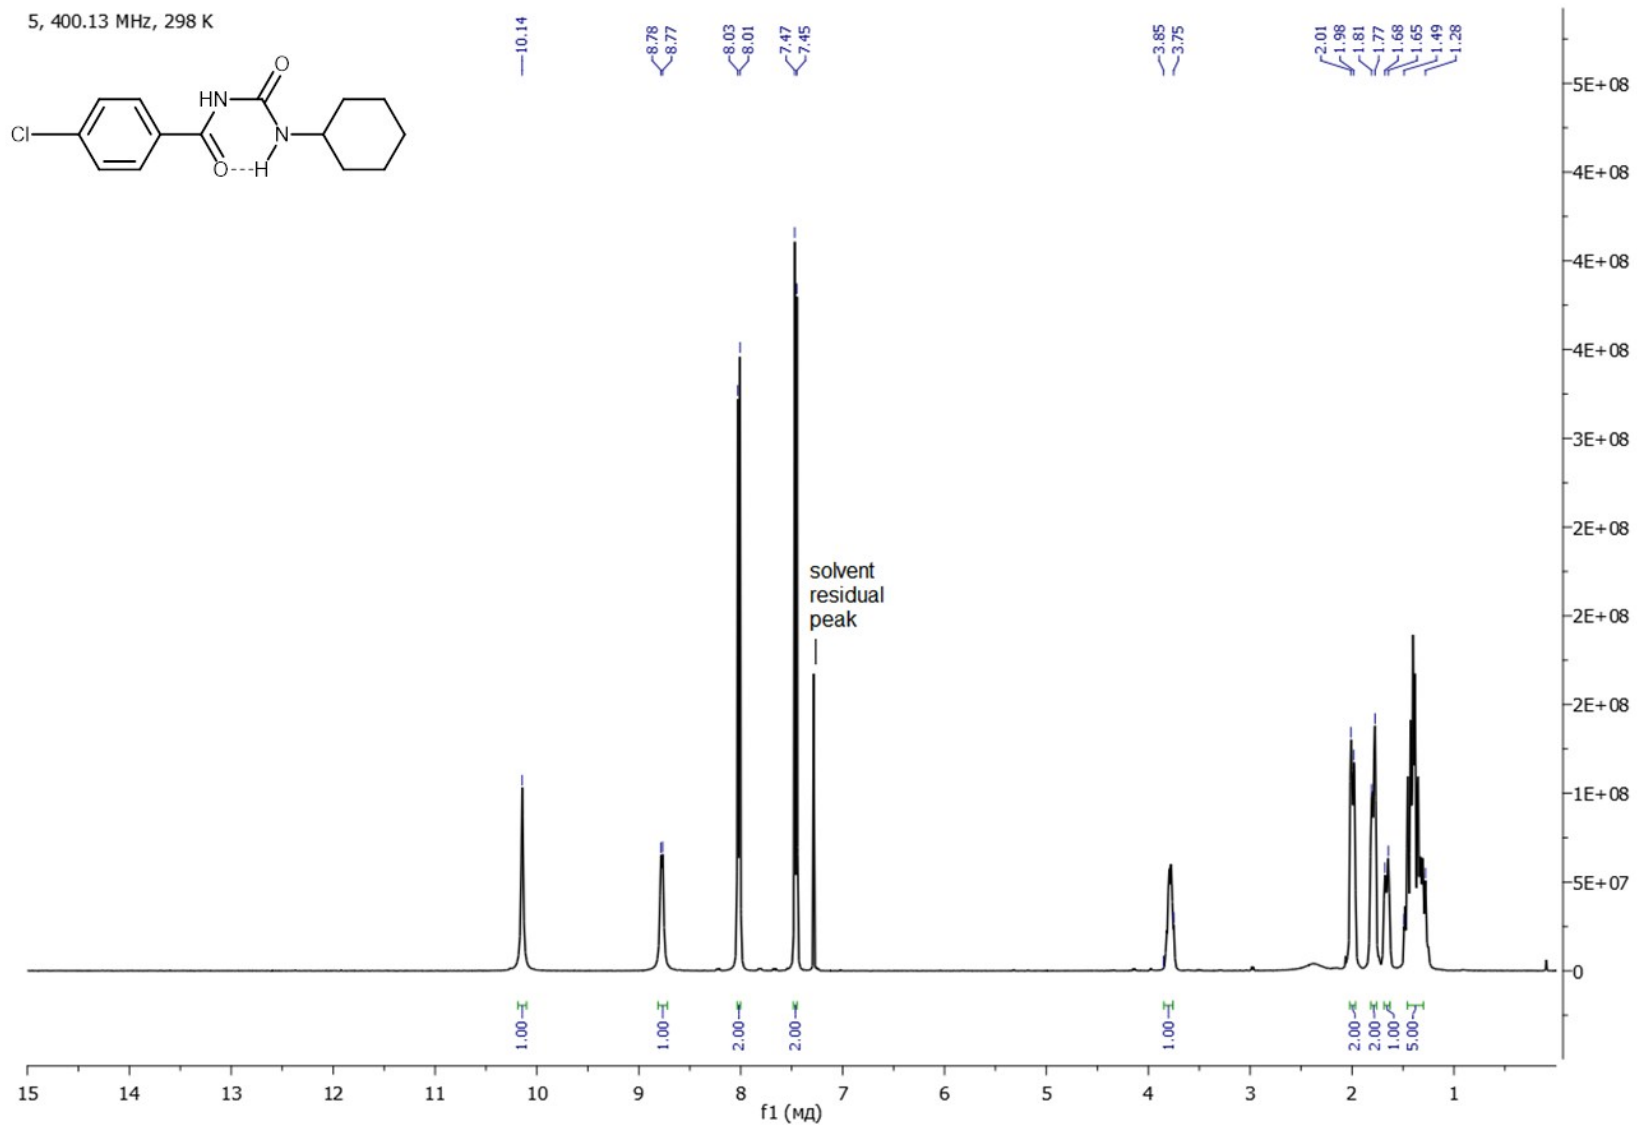

Figure 51S.  $^1\text{H}$  NMR spectrum of **5**.

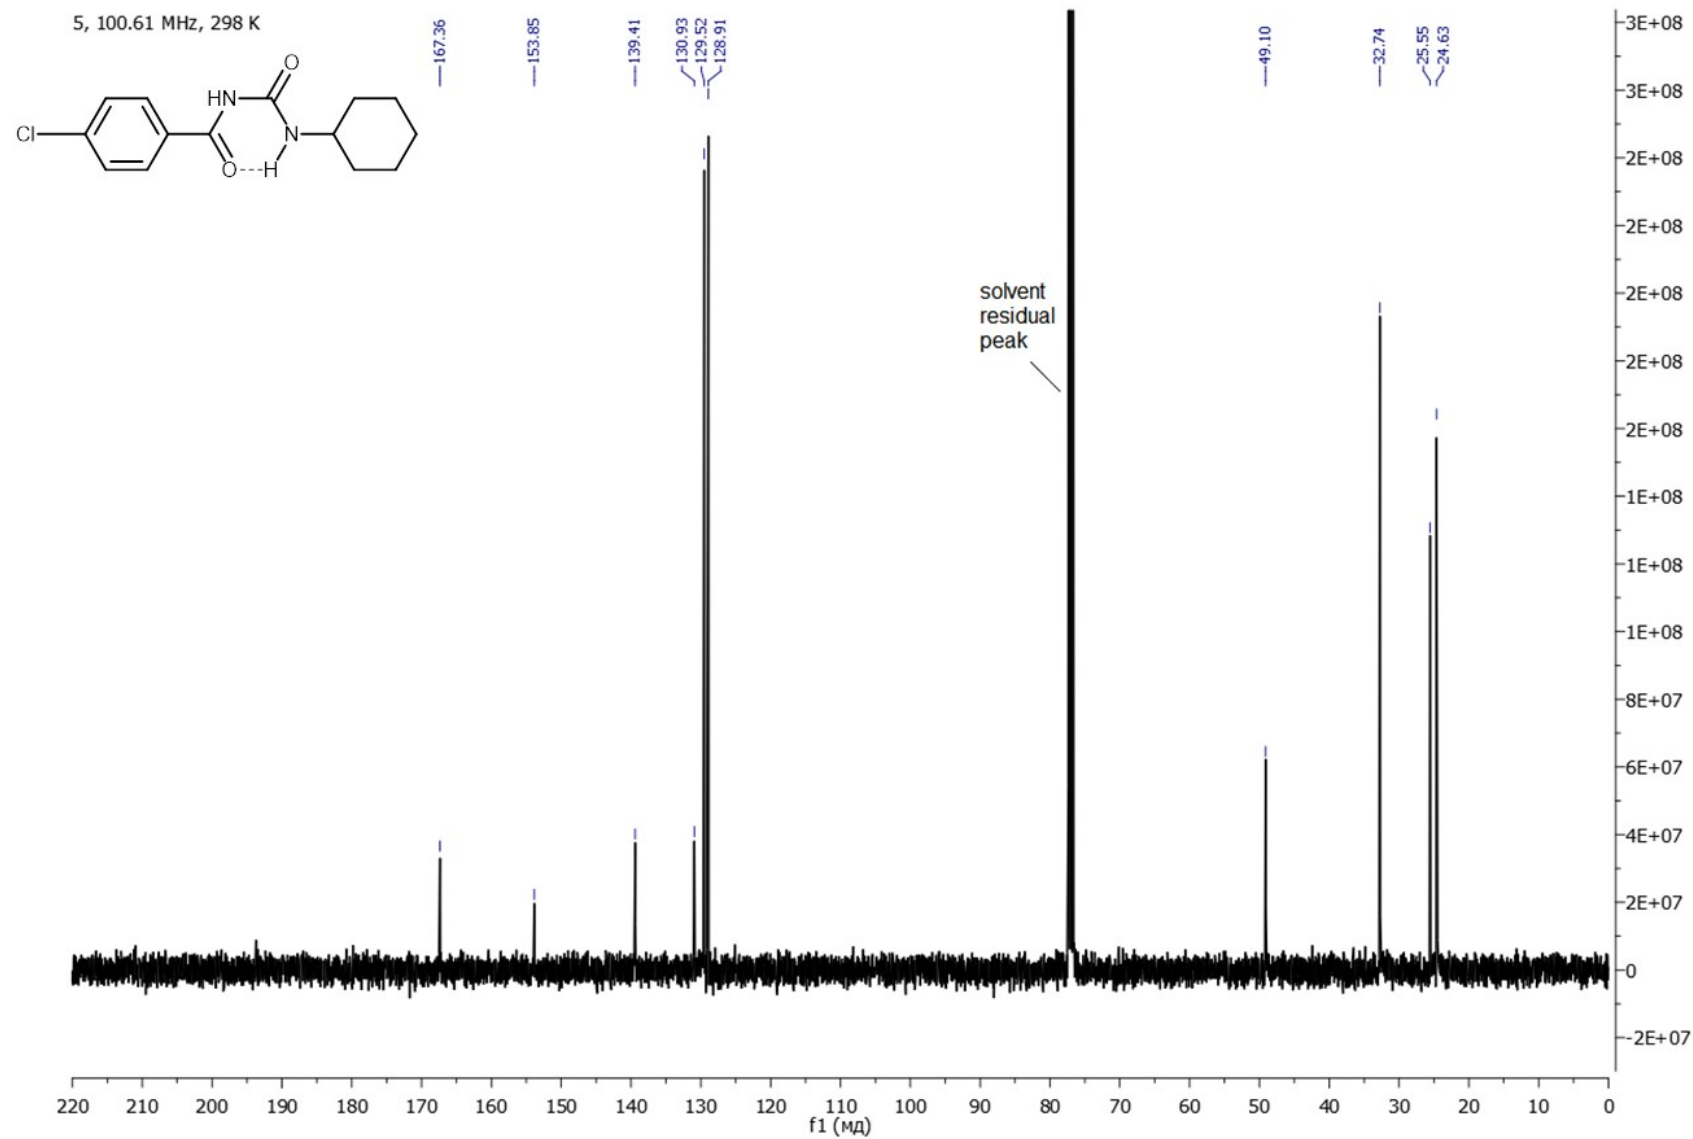

Figure 52S.  $^{13}\text{C}\{^1\text{H}\}$  NMR spectrum of 5.

**Acquisition Parameter**

|             |            |                      |          |                  |           |
|-------------|------------|----------------------|----------|------------------|-----------|
| Source Type | ESI        | Ion Polarity         | Positive | Set Nebulizer    | 0.4 Bar   |
| Focus       | Not active |                      |          | Set Dry Heater   | 180 °C    |
| Scan Begin  | 50 m/z     | Set Capillary        | 4500 V   | Set Dry Gas      | 4.0 l/min |
| Scan End    | 3000 m/z   | Set End Plate Offset | -500 V   | Set Divert Valve | Source    |

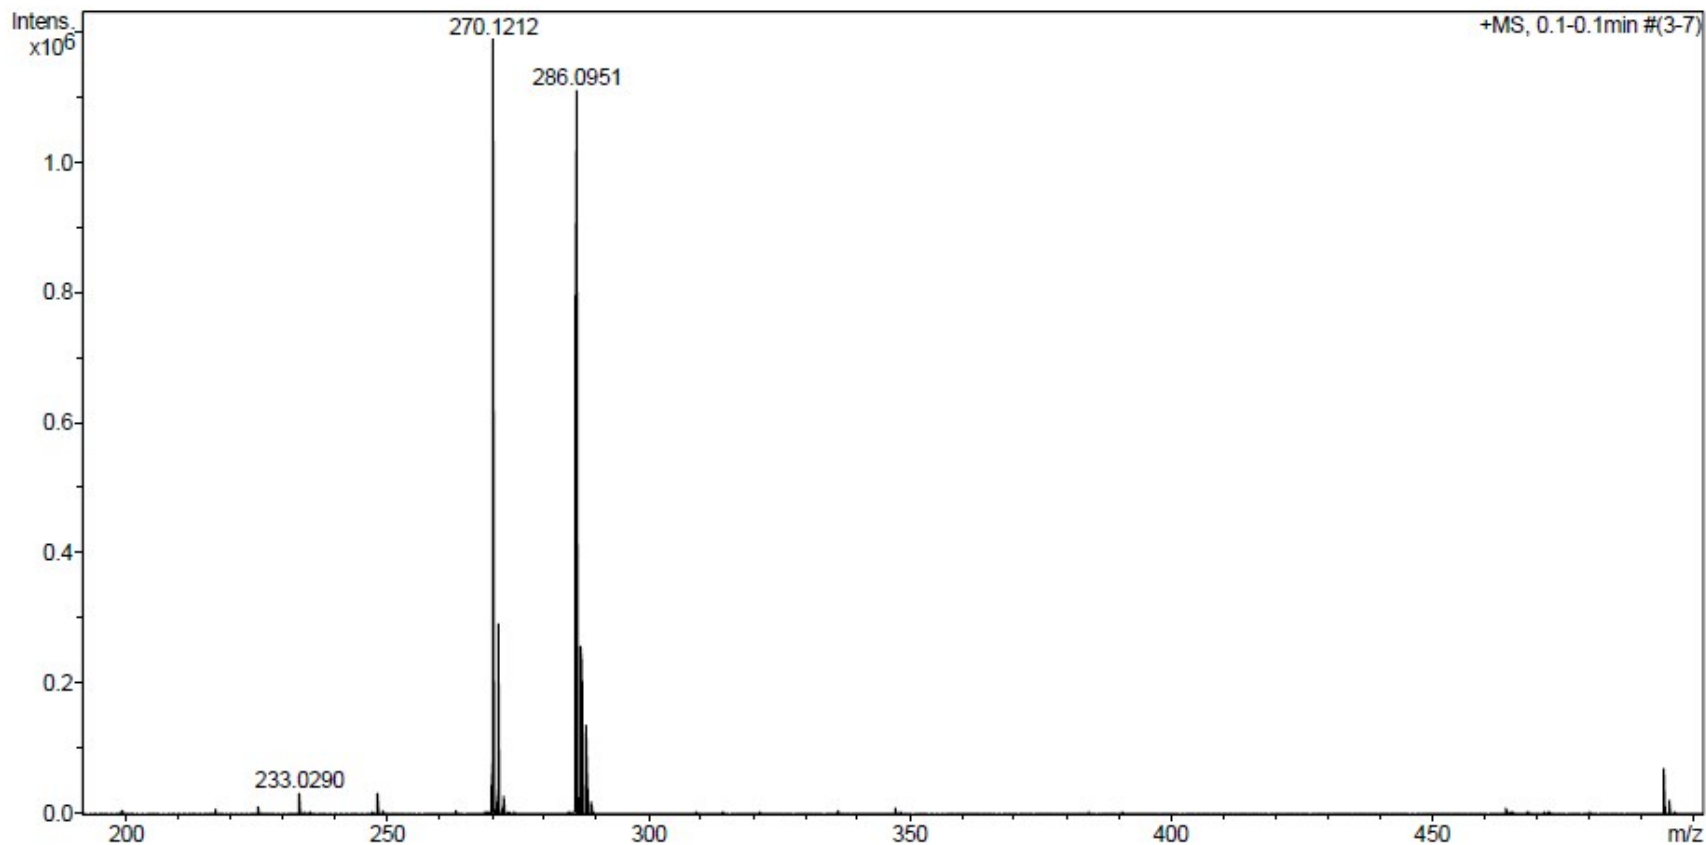

**Figure 53S.** HRESI<sup>+</sup>-MS of **6**.

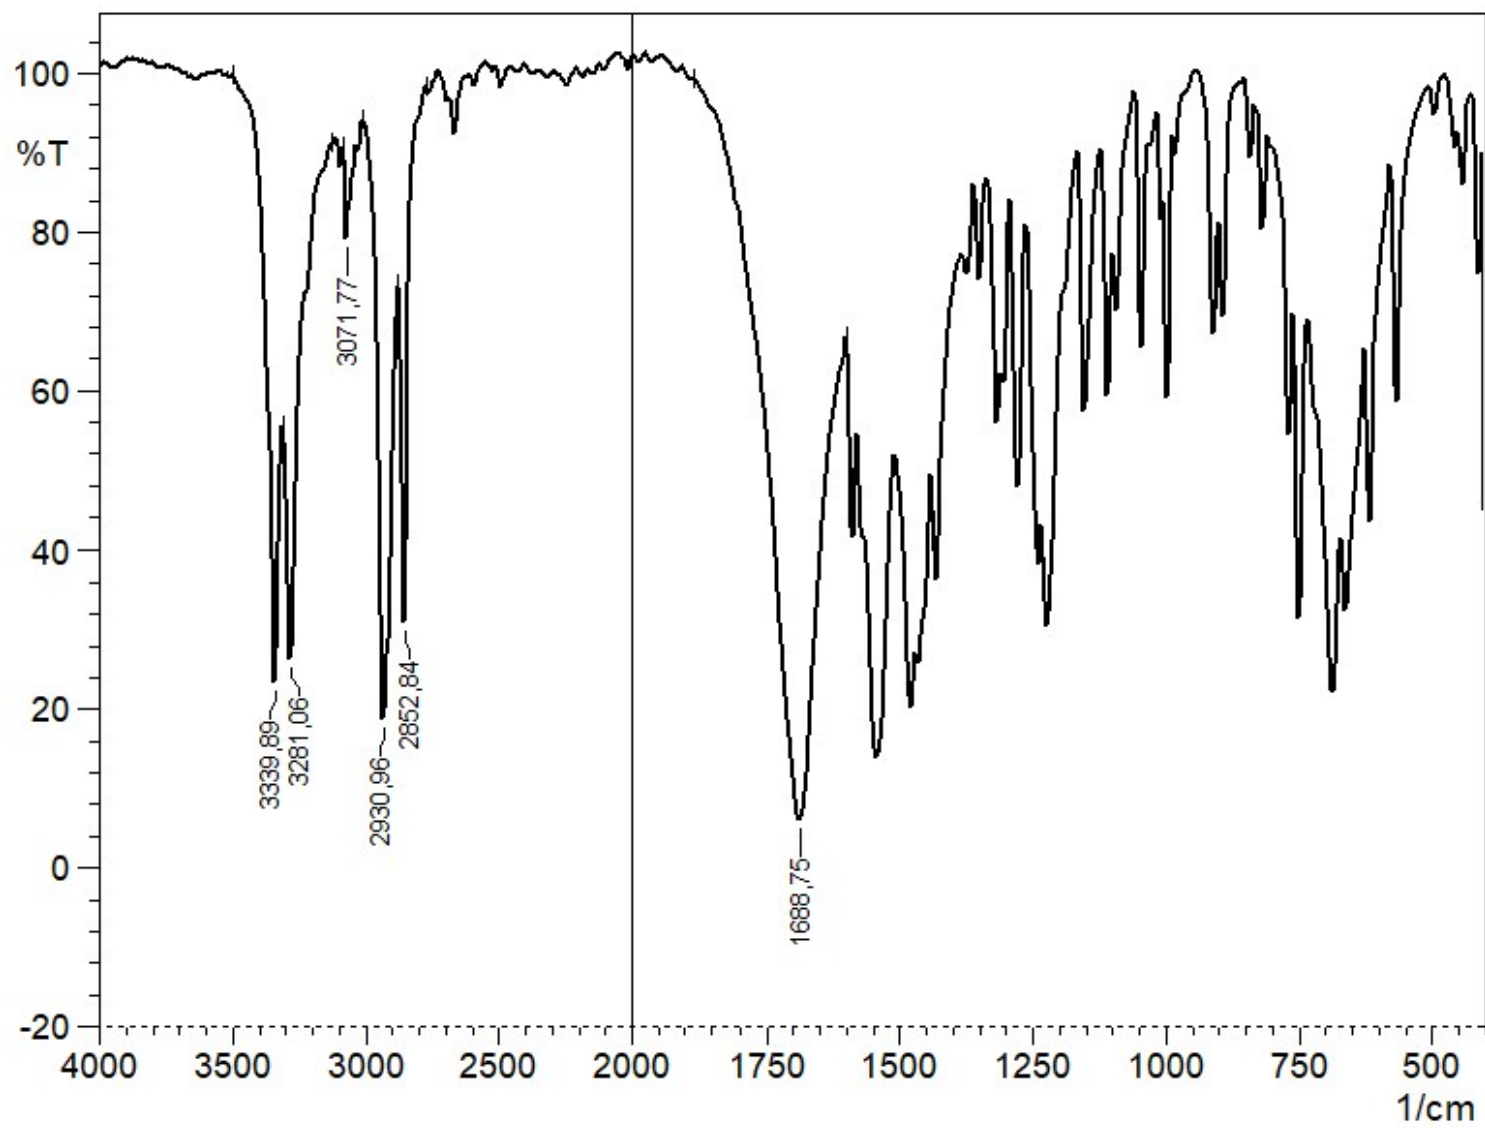

Figure 54S. IR spectrum of 6.

6, 400.13 MHz, 298 K

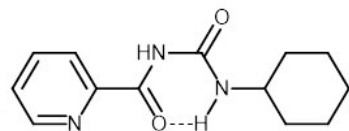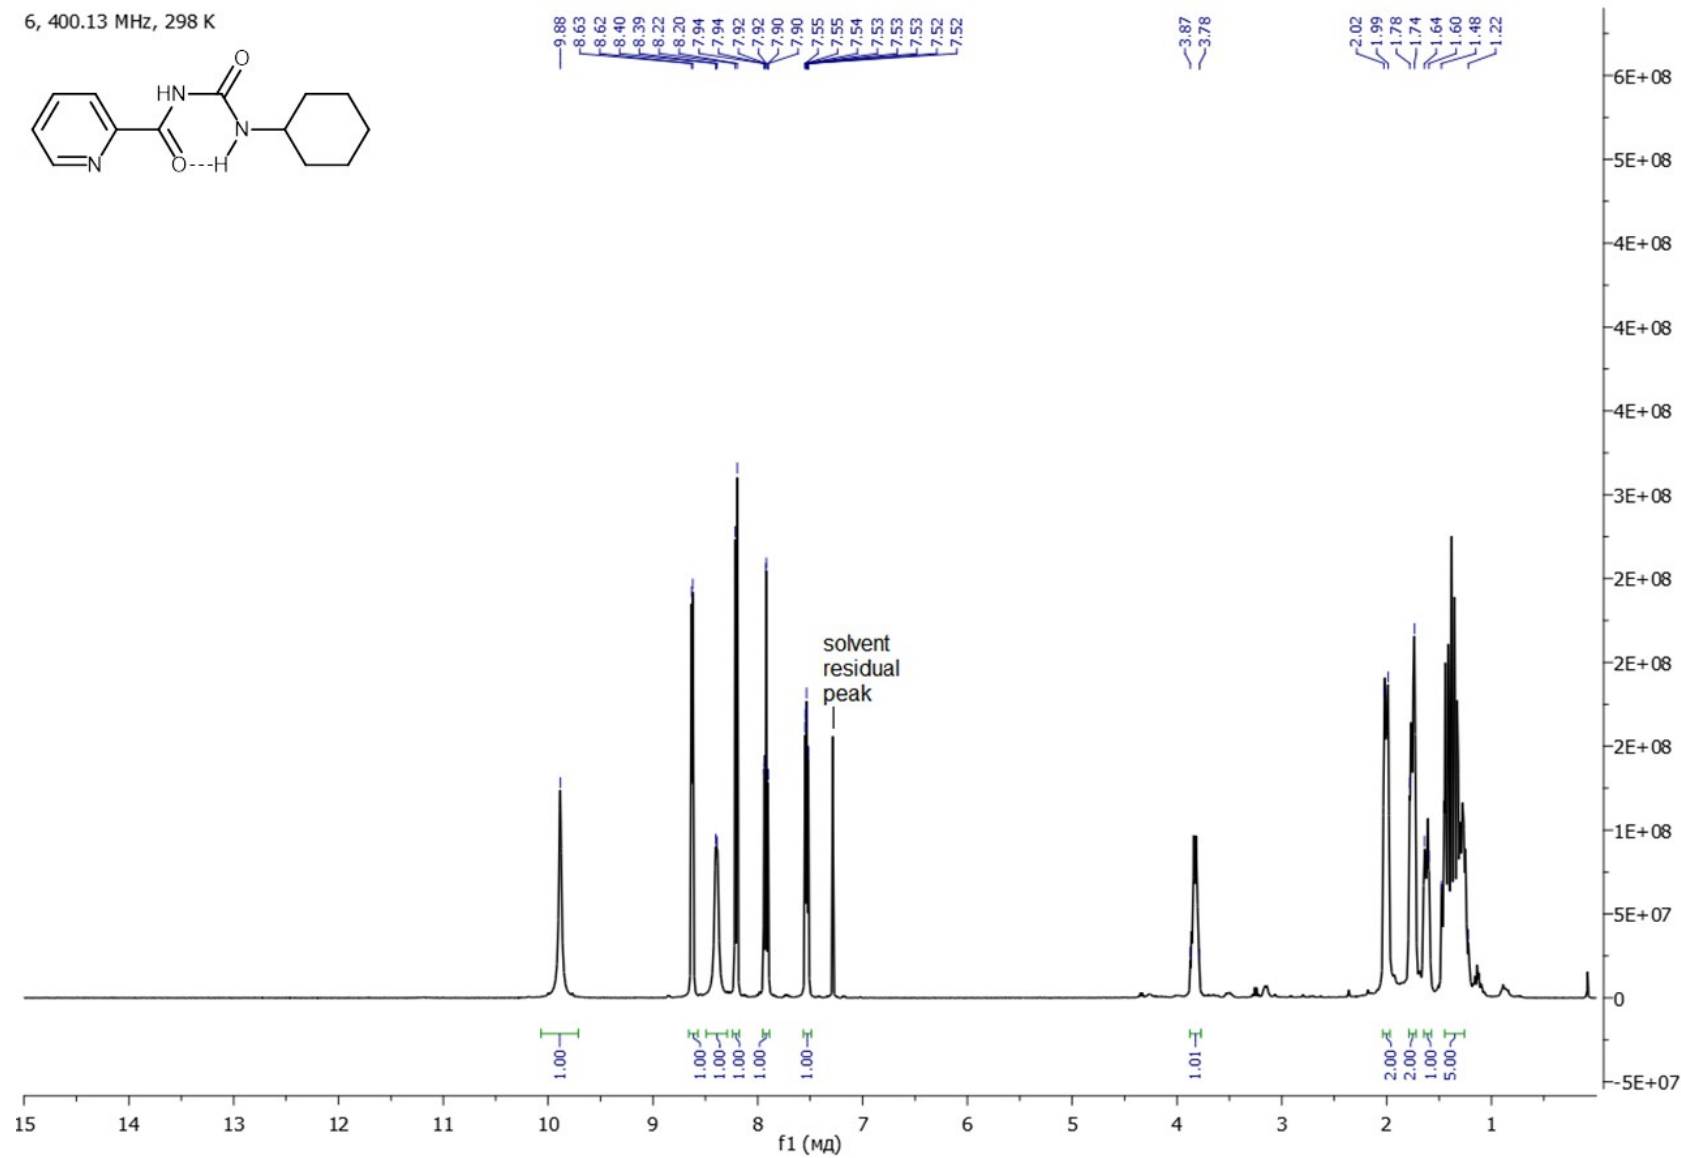

Figure 55S.  $^1\text{H}$  NMR spectrum of 6.



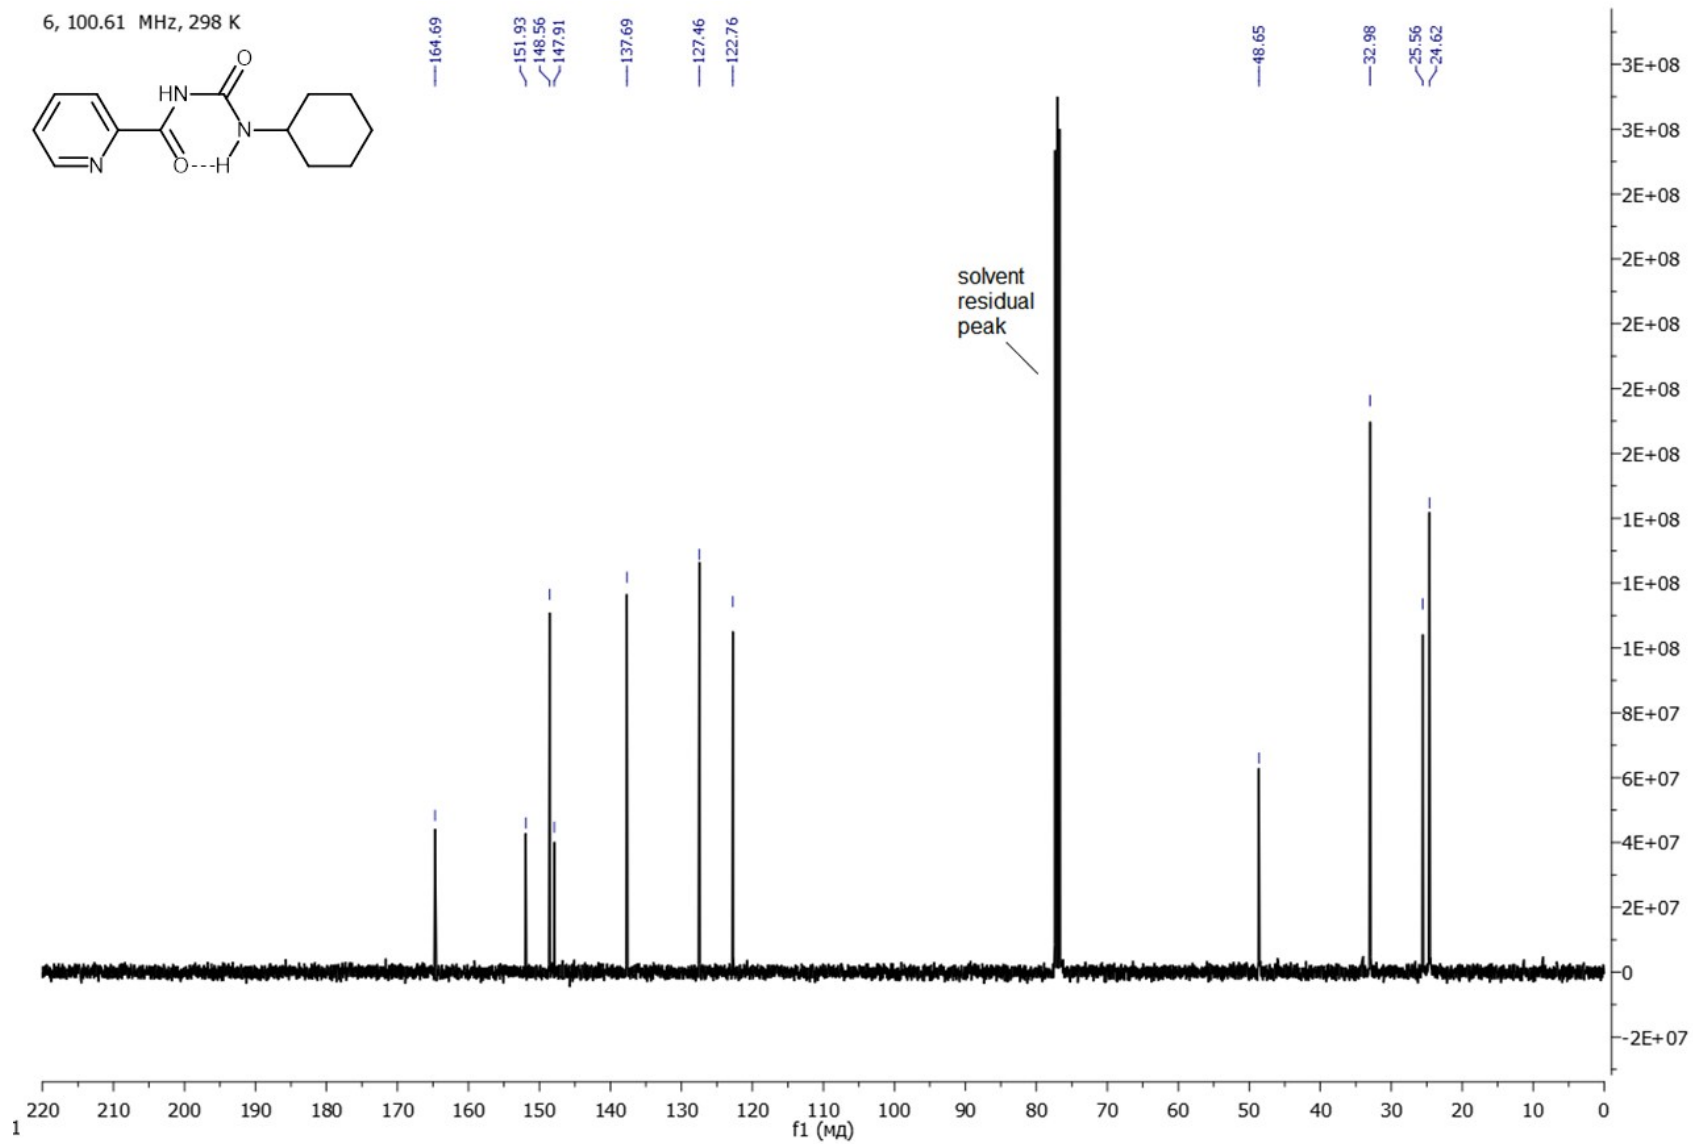

Figure 56S.  $^{13}\text{C}\{^1\text{H}\}$  NMR spectrum of 6.

**Acquisition Parameter**

|             |            |                      |          |                  |           |
|-------------|------------|----------------------|----------|------------------|-----------|
| Source Type | ESI        | Ion Polarity         | Positive | Set Nebulizer    | 0.4 Bar   |
| Focus       | Not active |                      |          | Set Dry Heater   | 180 °C    |
| Scan Begin  | 50 m/z     | Set Capillary        | 4500 V   | Set Dry Gas      | 4.0 l/min |
| Scan End    | 3000 m/z   | Set End Plate Offset | -500 V   | Set Divert Valve | Source    |

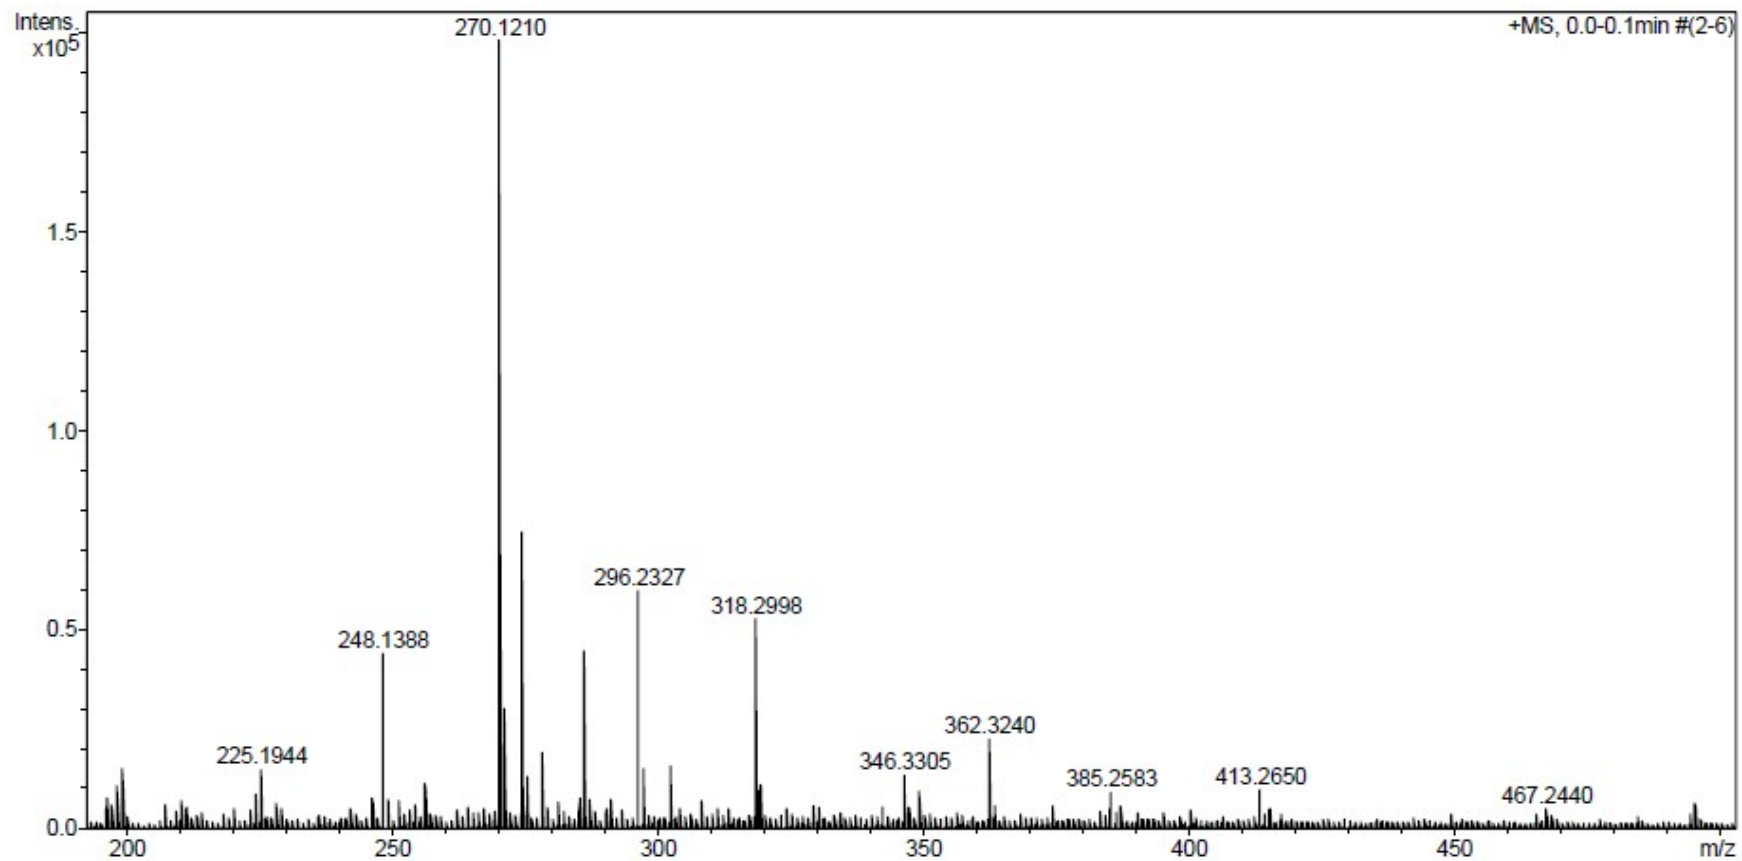

**Figure 57S.** HRESI<sup>+</sup>-MS of 7.

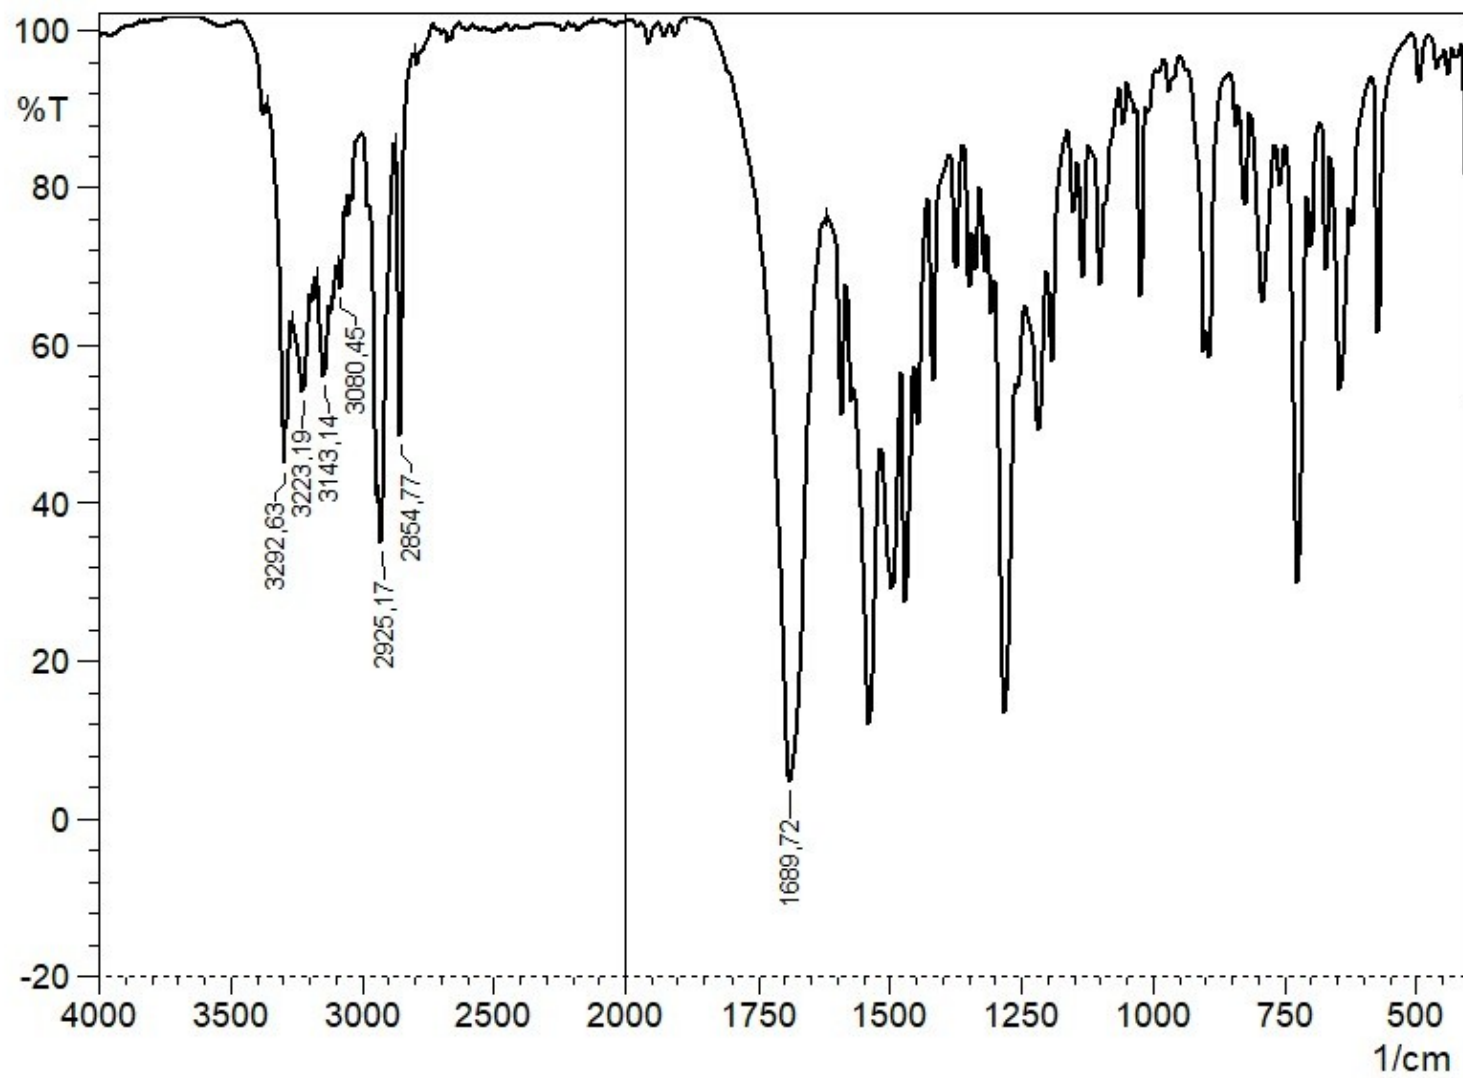

Figure 58S. IR spectrum of 7.

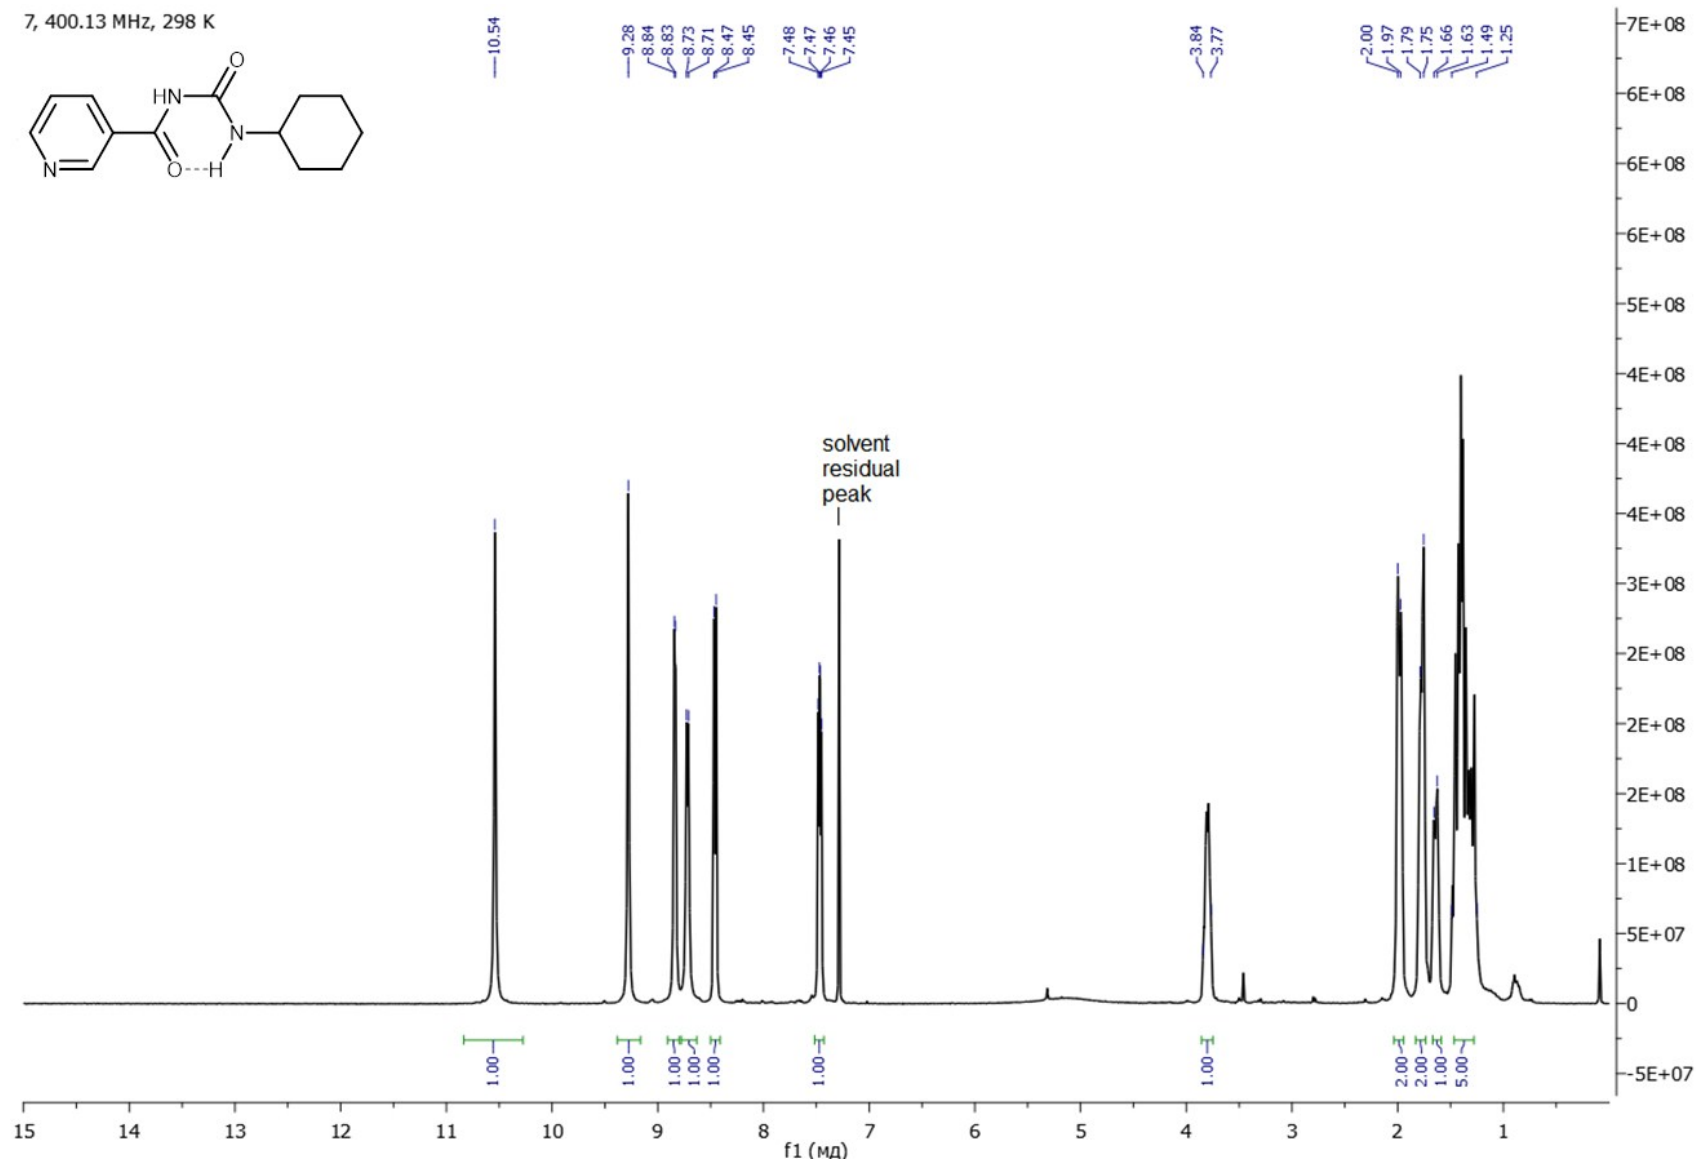

Figure 59S. <sup>1</sup>H NMR spectrum of 7.

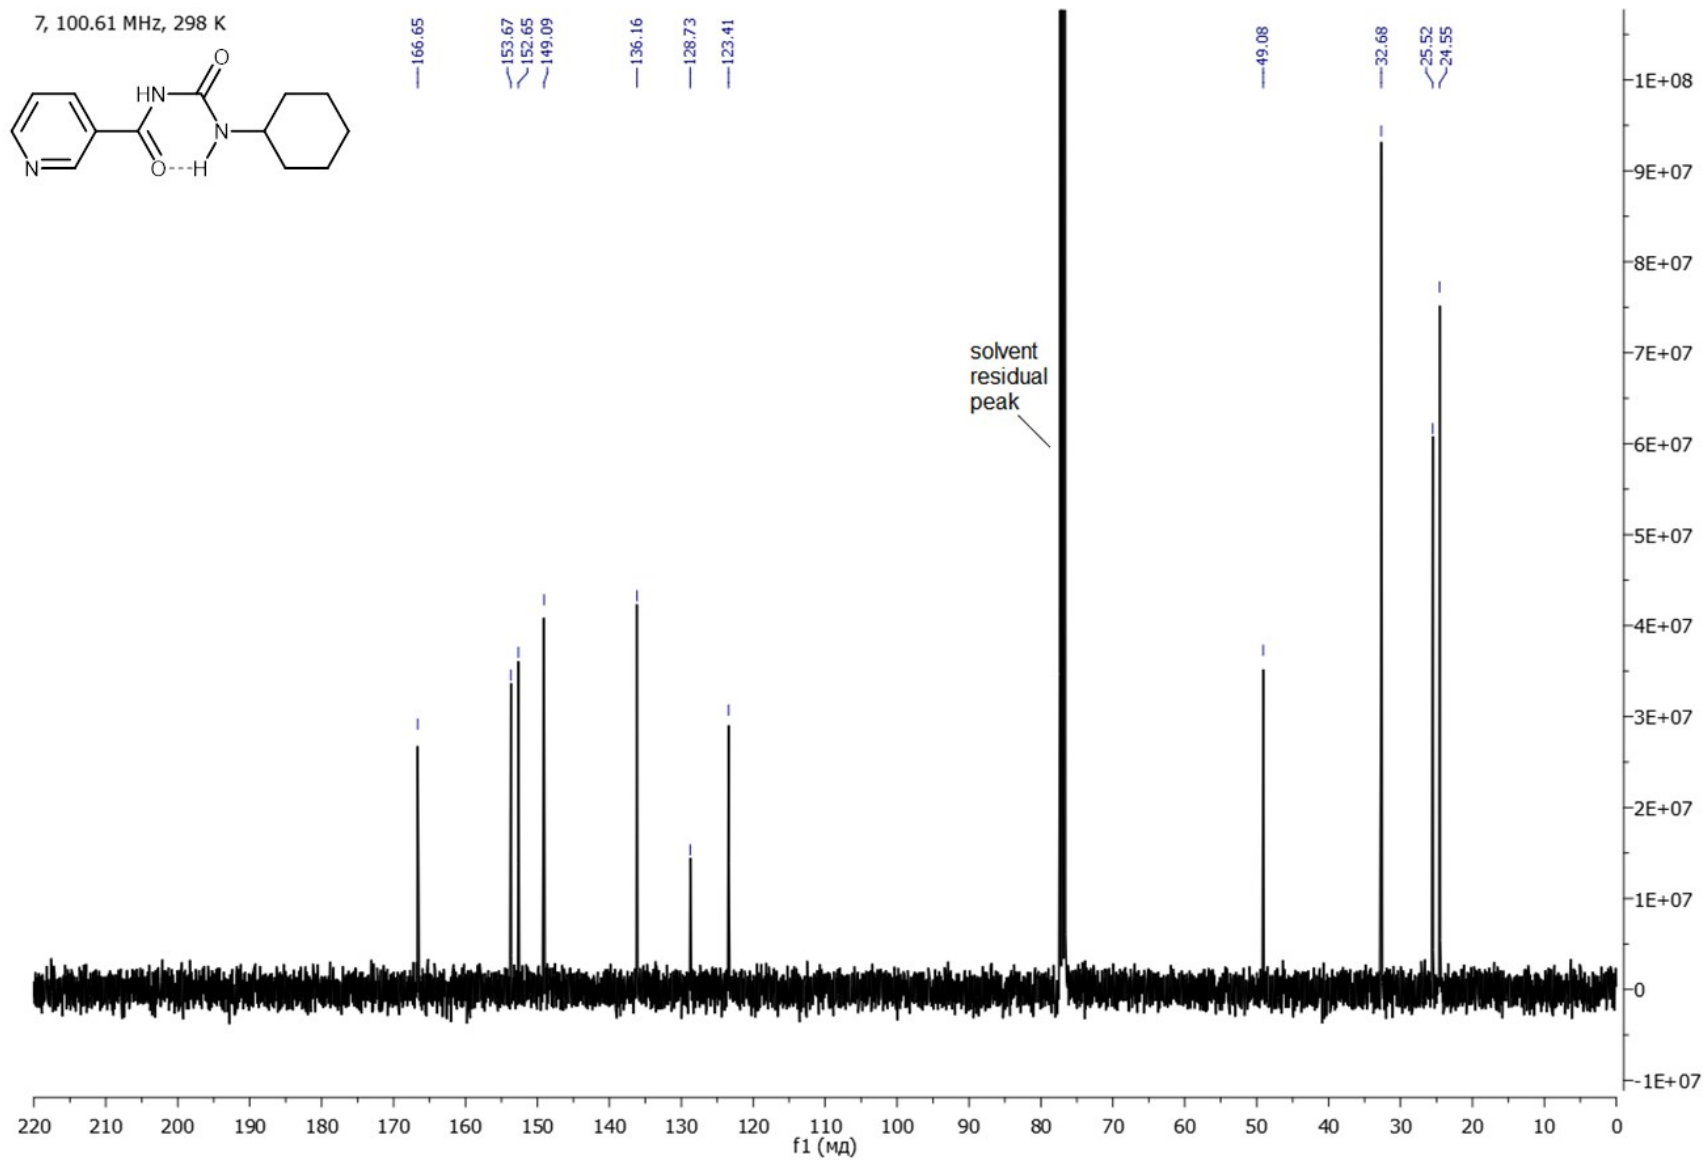

Figure 60S.  $^{13}\text{C}\{^1\text{H}\}$  NMR spectrum of 7.

---

**Acquisition Parameter**

|             |            |                      |          |                  |           |
|-------------|------------|----------------------|----------|------------------|-----------|
| Source Type | ESI        | Ion Polarity         | Positive | Set Nebulizer    | 0.4 Bar   |
| Focus       | Not active |                      |          | Set Dry Heater   | 180 °C    |
| Scan Begin  | 50 m/z     | Set Capillary        | 4500 V   | Set Dry Gas      | 4.0 l/min |
| Scan End    | 3000 m/z   | Set End Plate Offset | -500 V   | Set Divert Valve | Source    |

---

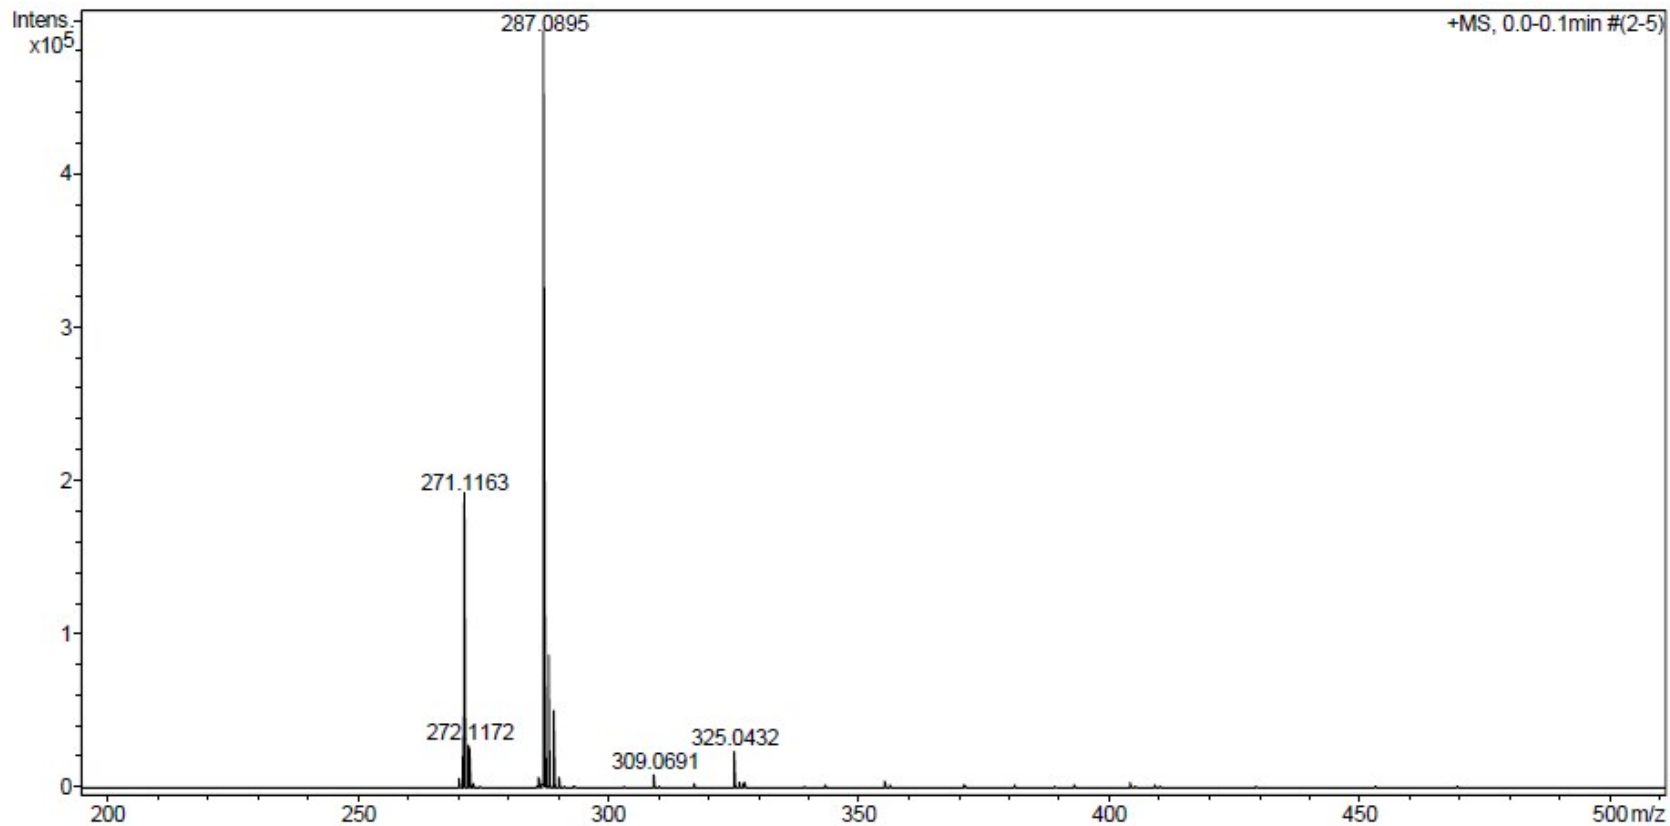

**Figure 61S.** HRESI<sup>+</sup>-MS of **8**.

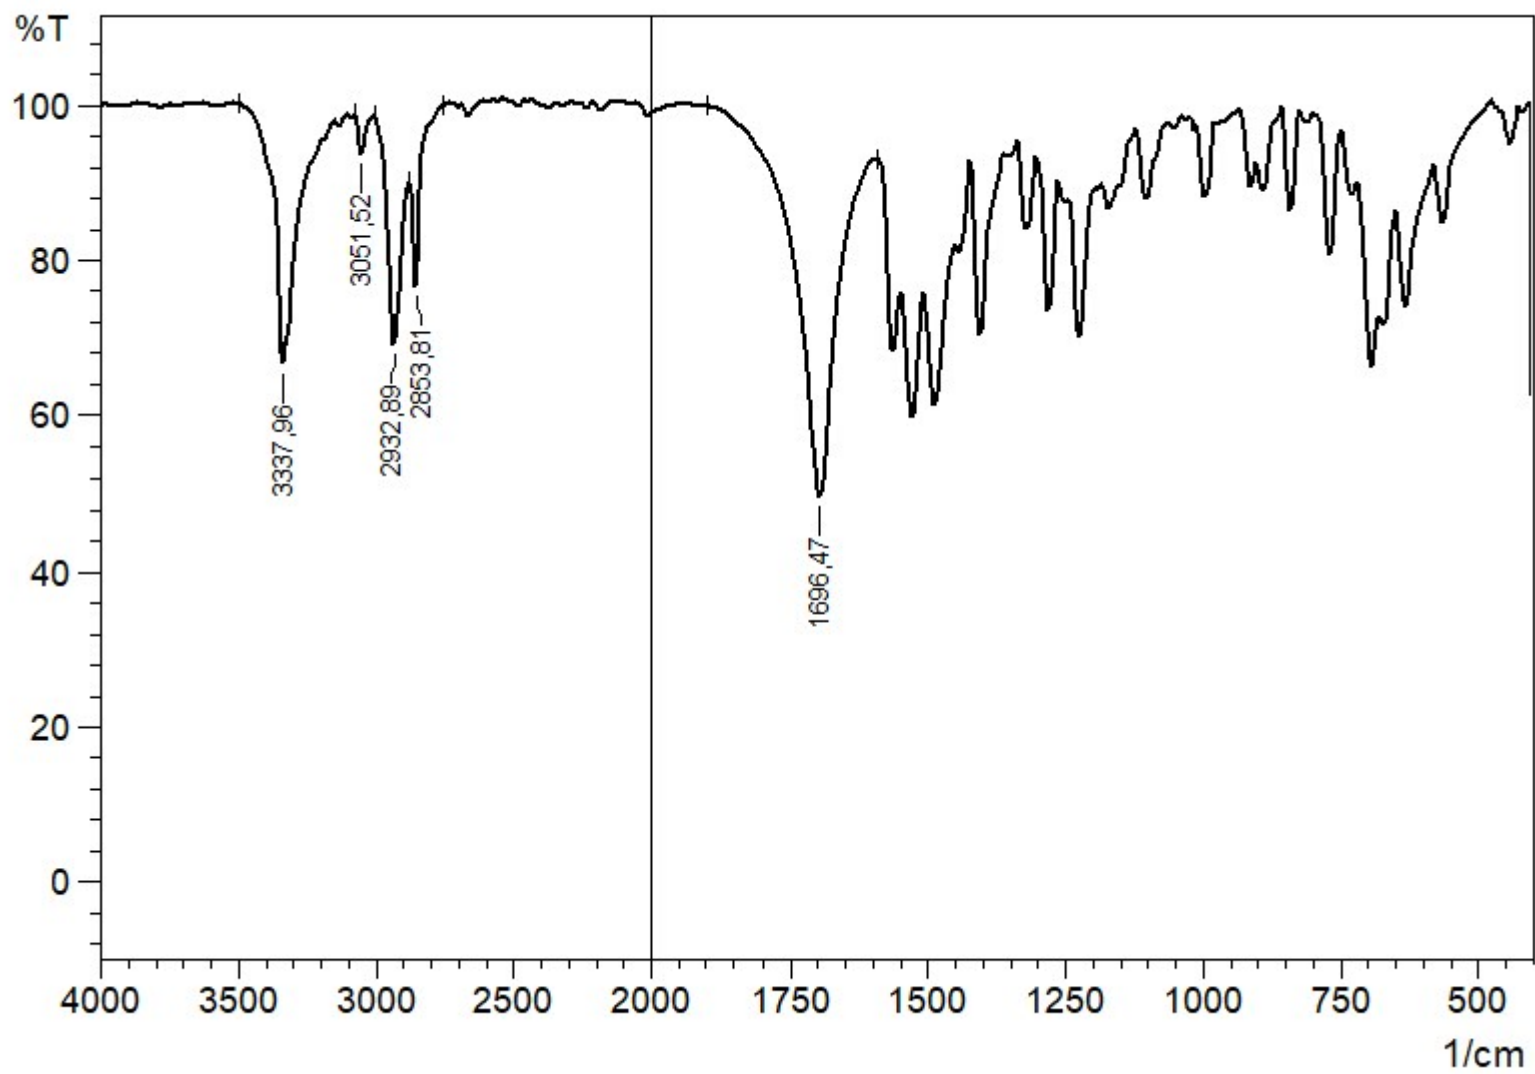

Figure 62S. IR spectrum of 8.

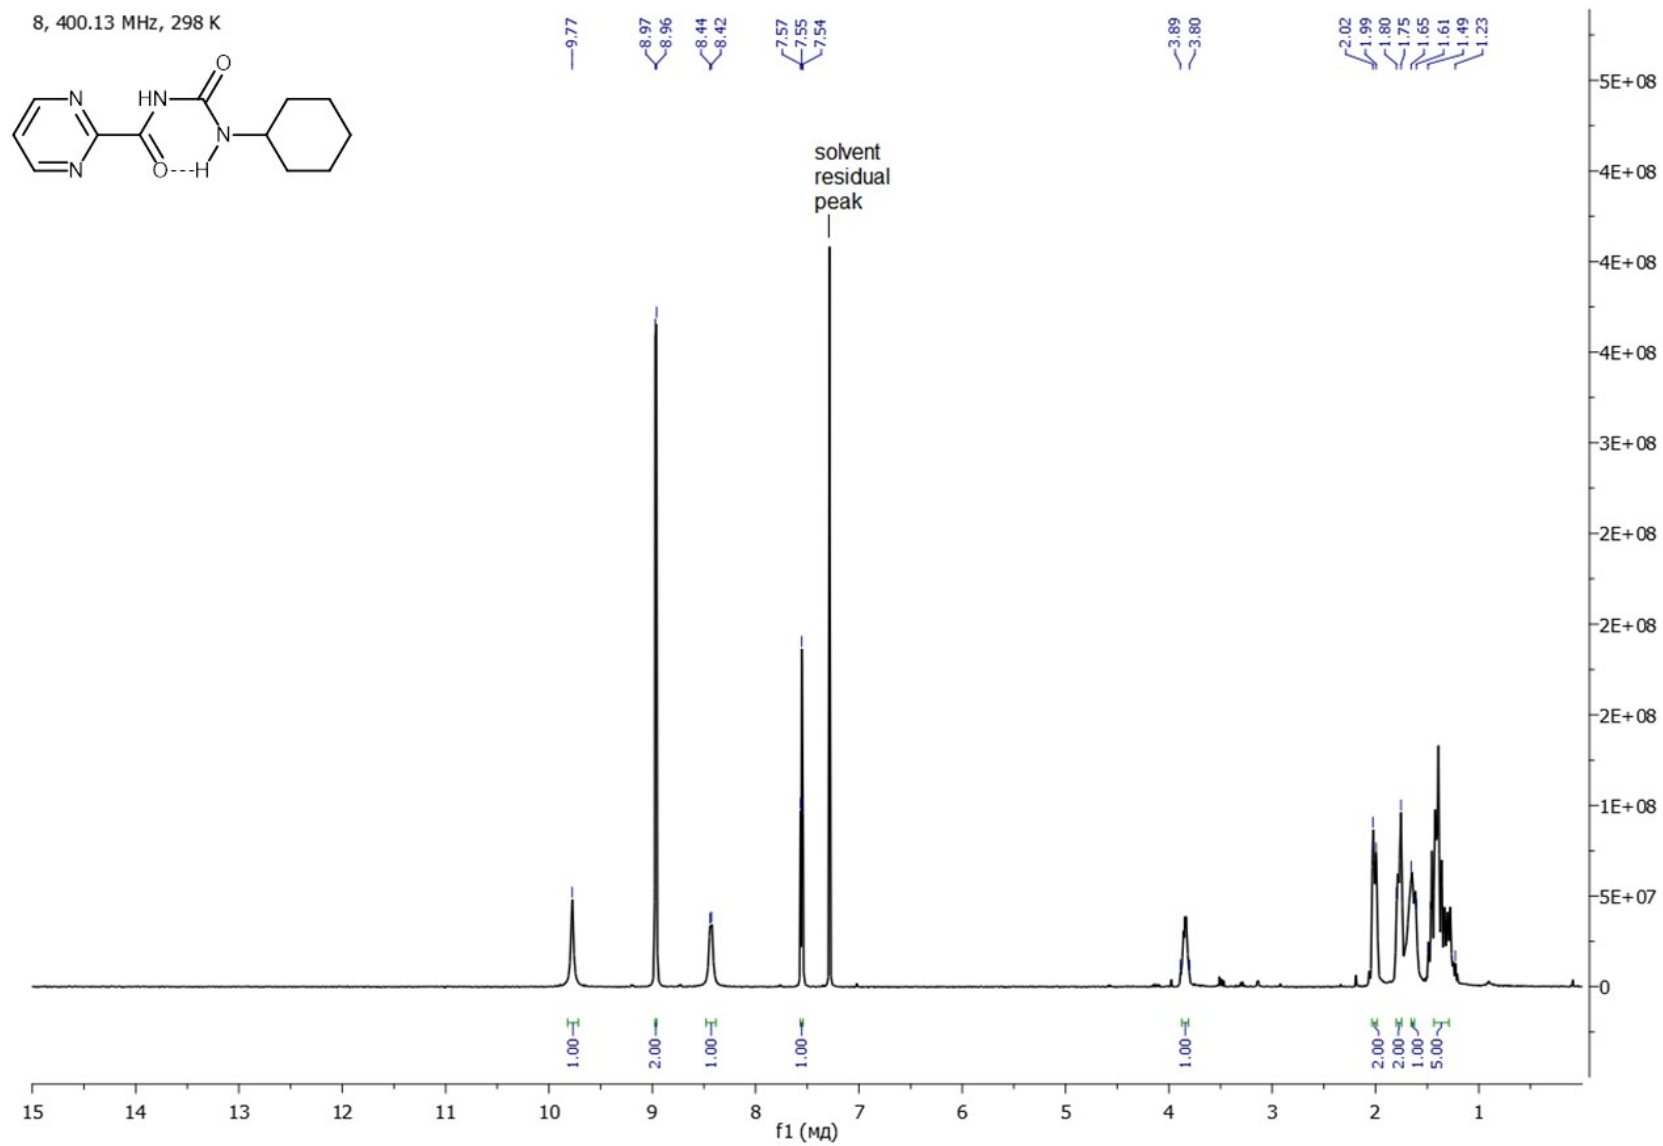

Figure 63S.  $^1\text{H}$  NMR spectrum of **8**.



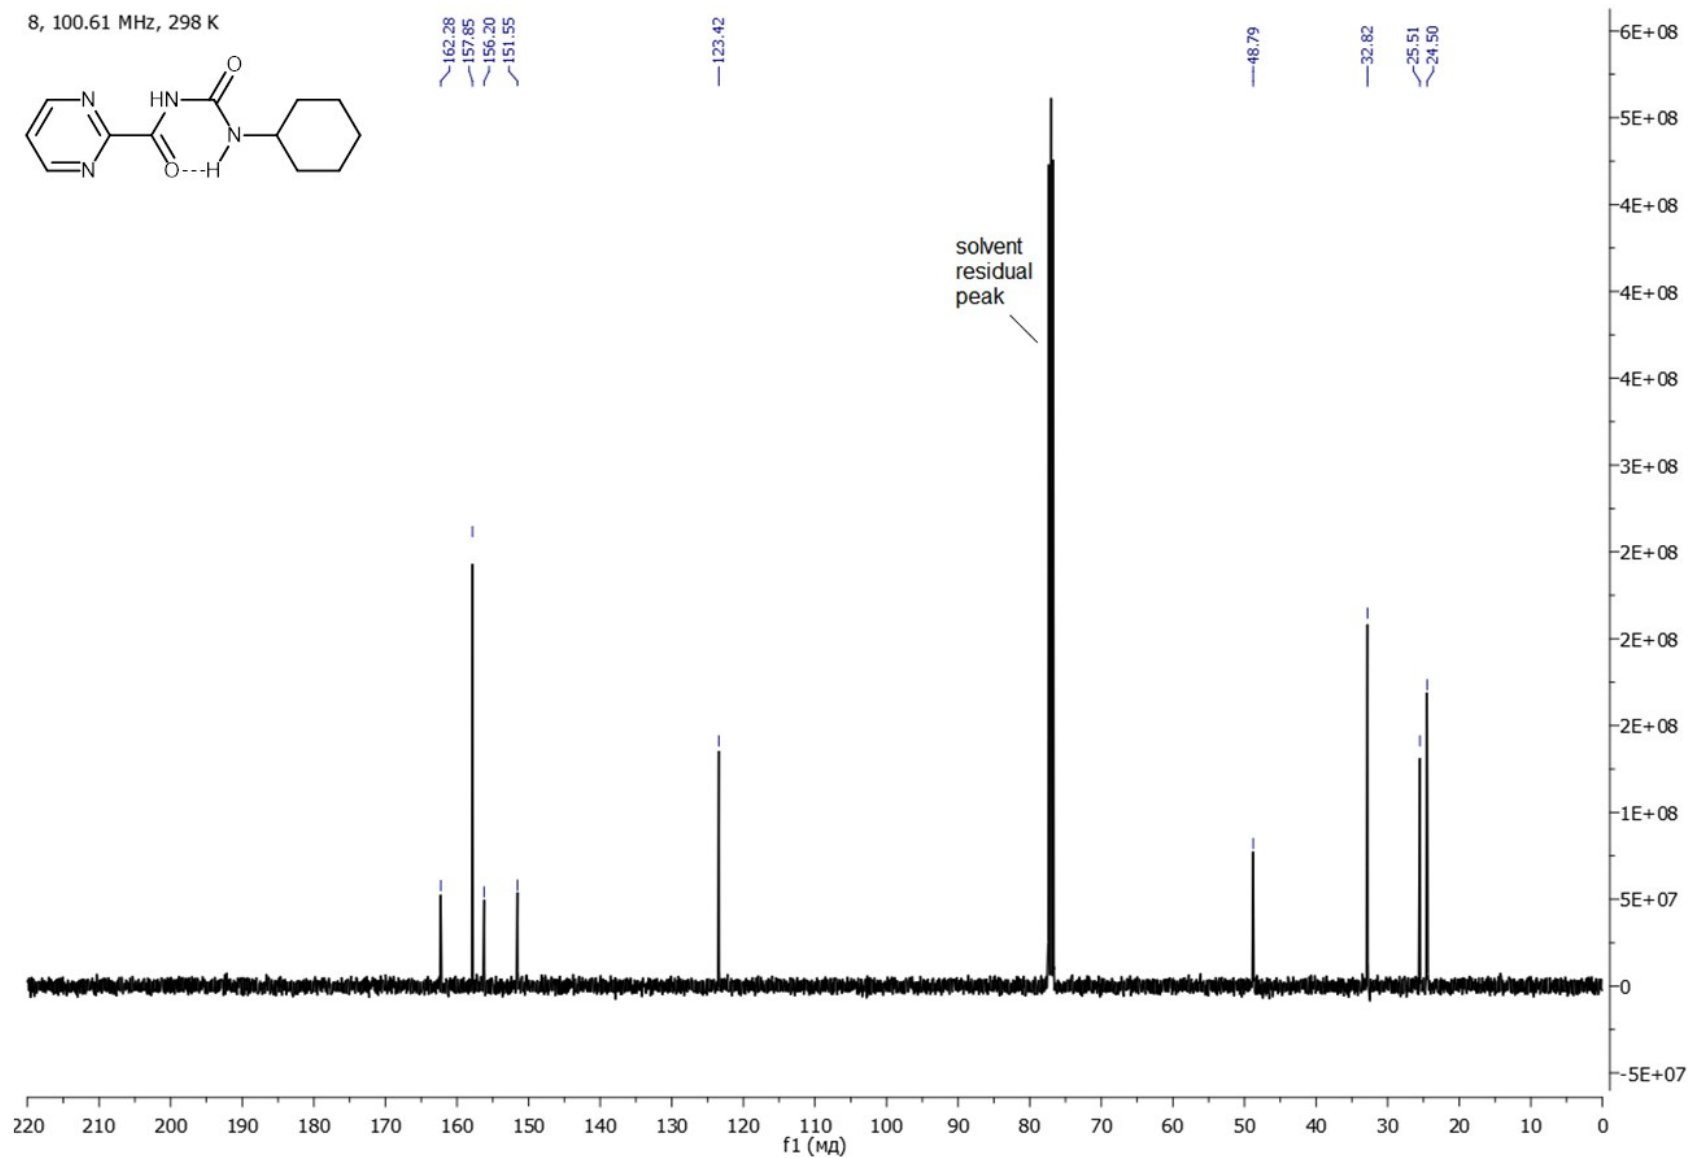

Figure 64S.  $^{13}\text{C}\{^1\text{H}\}$  NMR spectrum of **8**.

**Acquisition Parameter**

|             |            |                      |          |                  |           |
|-------------|------------|----------------------|----------|------------------|-----------|
| Source Type | ESI        | Ion Polarity         | Positive | Set Nebulizer    | 0.4 Bar   |
| Focus       | Not active |                      |          | Set Dry Heater   | 180 °C    |
| Scan Begin  | 50 m/z     | Set Capillary        | 4500 V   | Set Dry Gas      | 4.0 l/min |
| Scan End    | 3000 m/z   | Set End Plate Offset | -500 V   | Set Divert Valve | Source    |

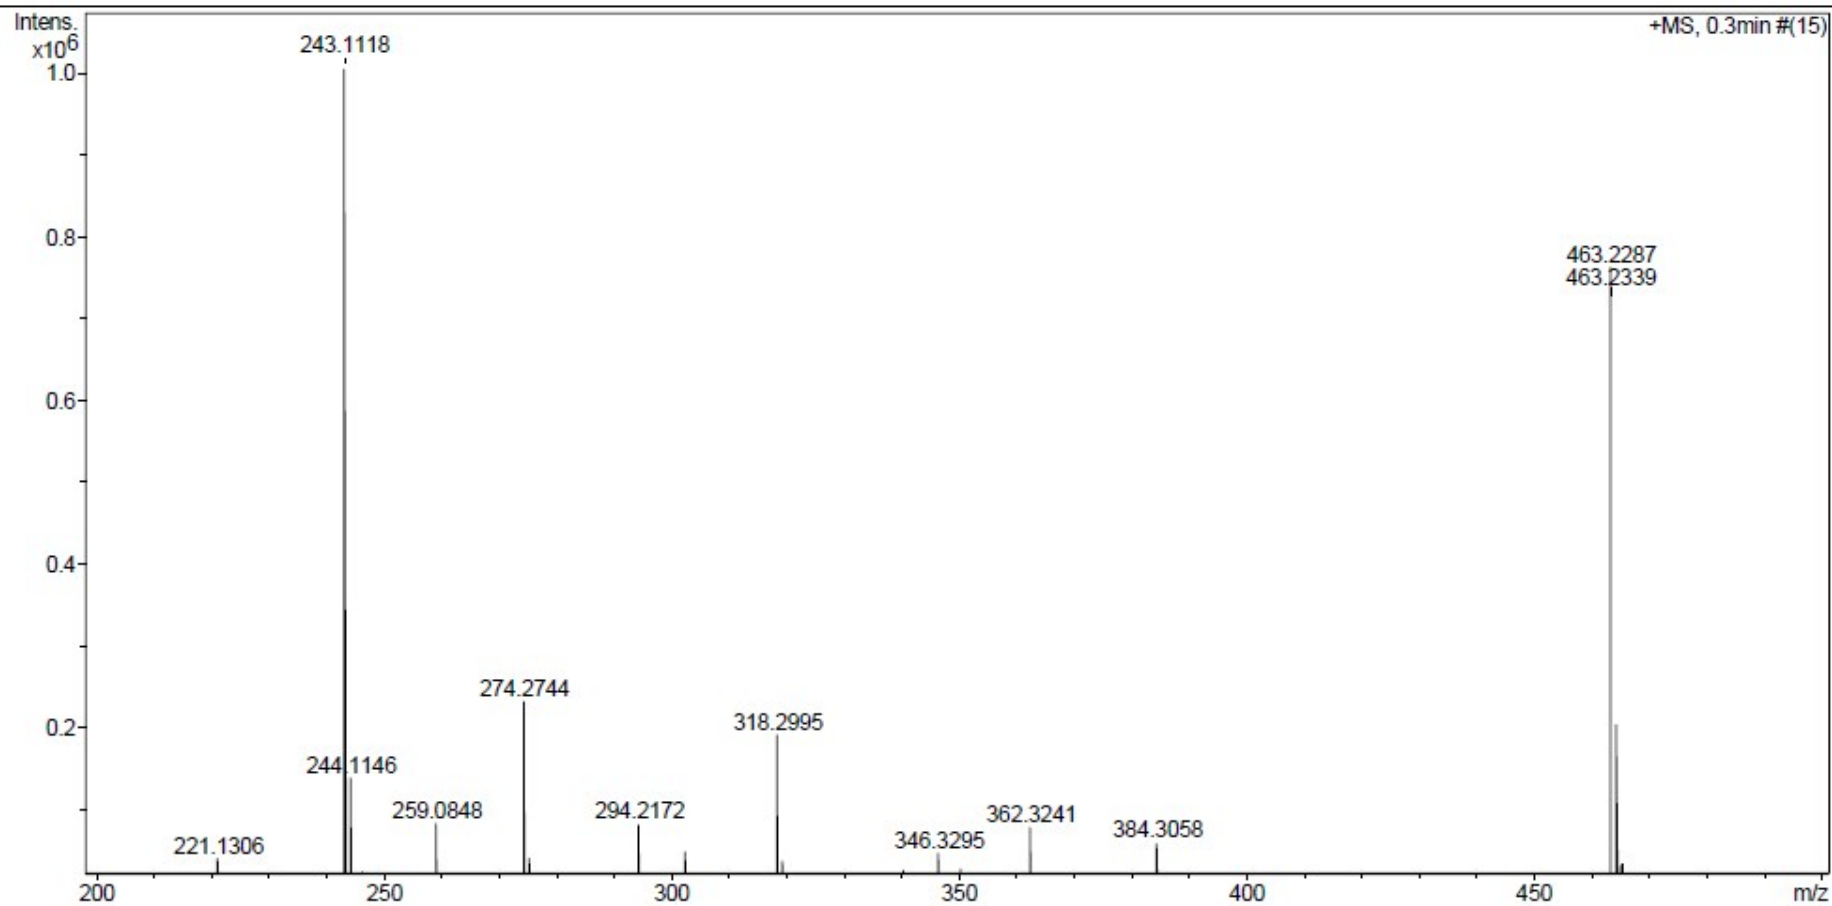

**Figure 65S.** HRESI<sup>+</sup>-MS of **9**.

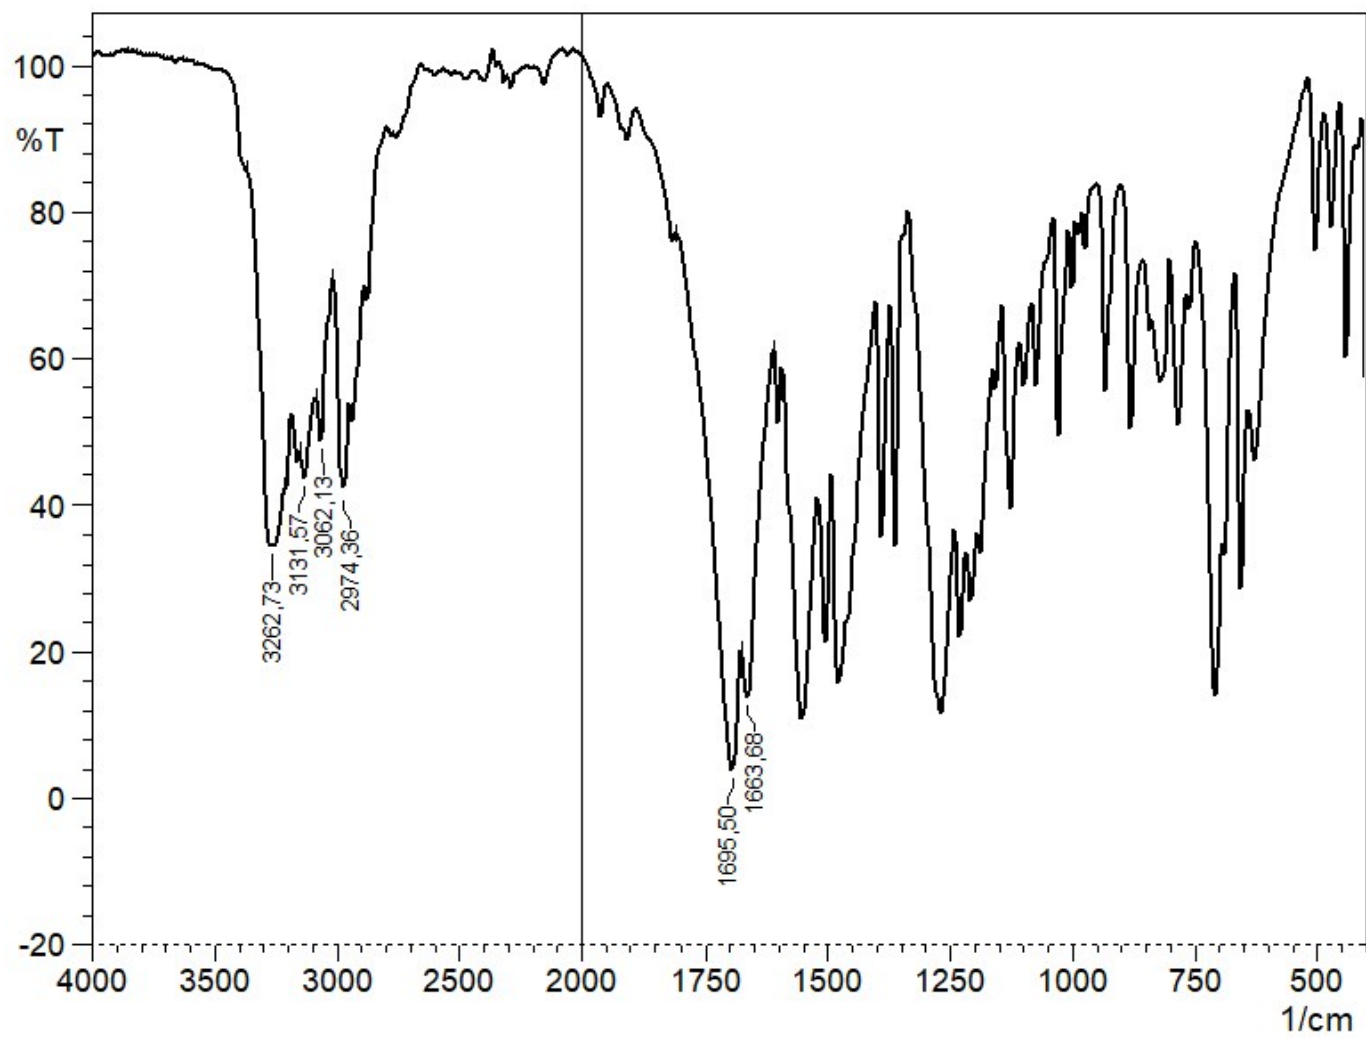

**Figure 66S.** IR spectrum of **9**.

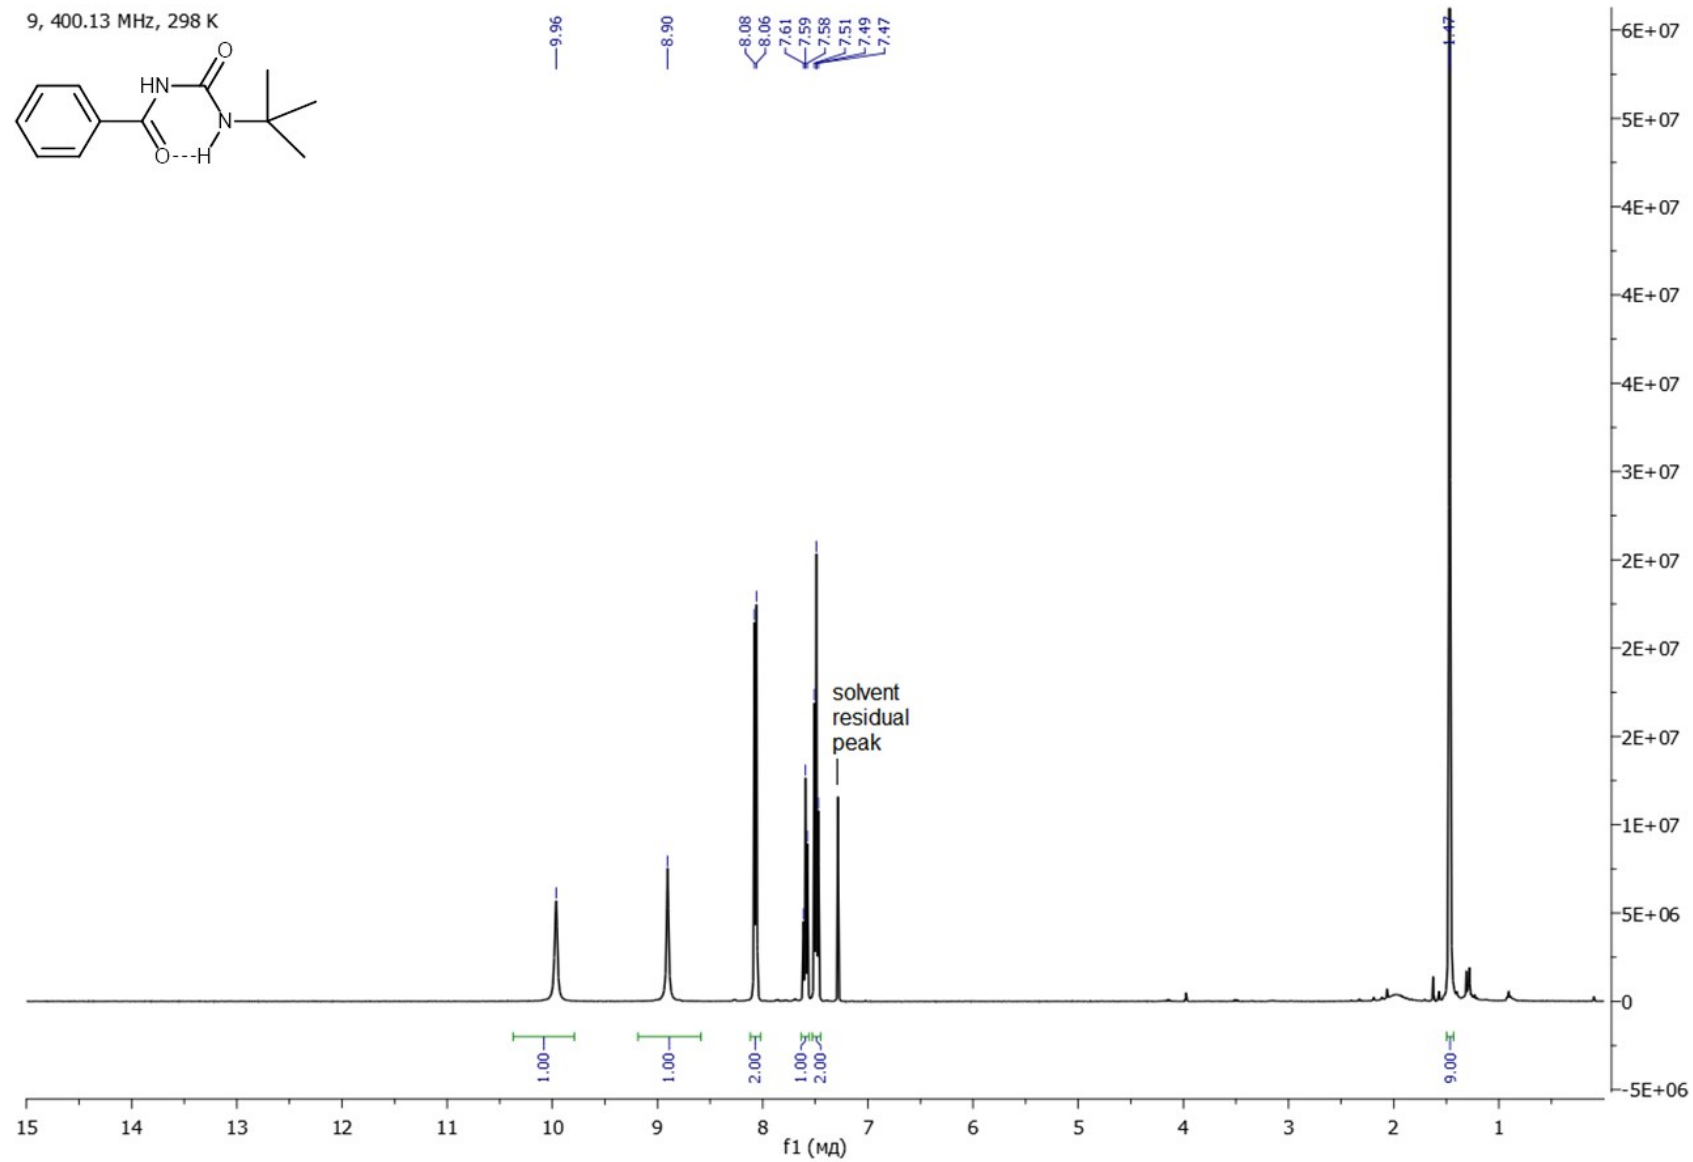

Figure 67S.  $^1\text{H}$  NMR spectrum of **9**.

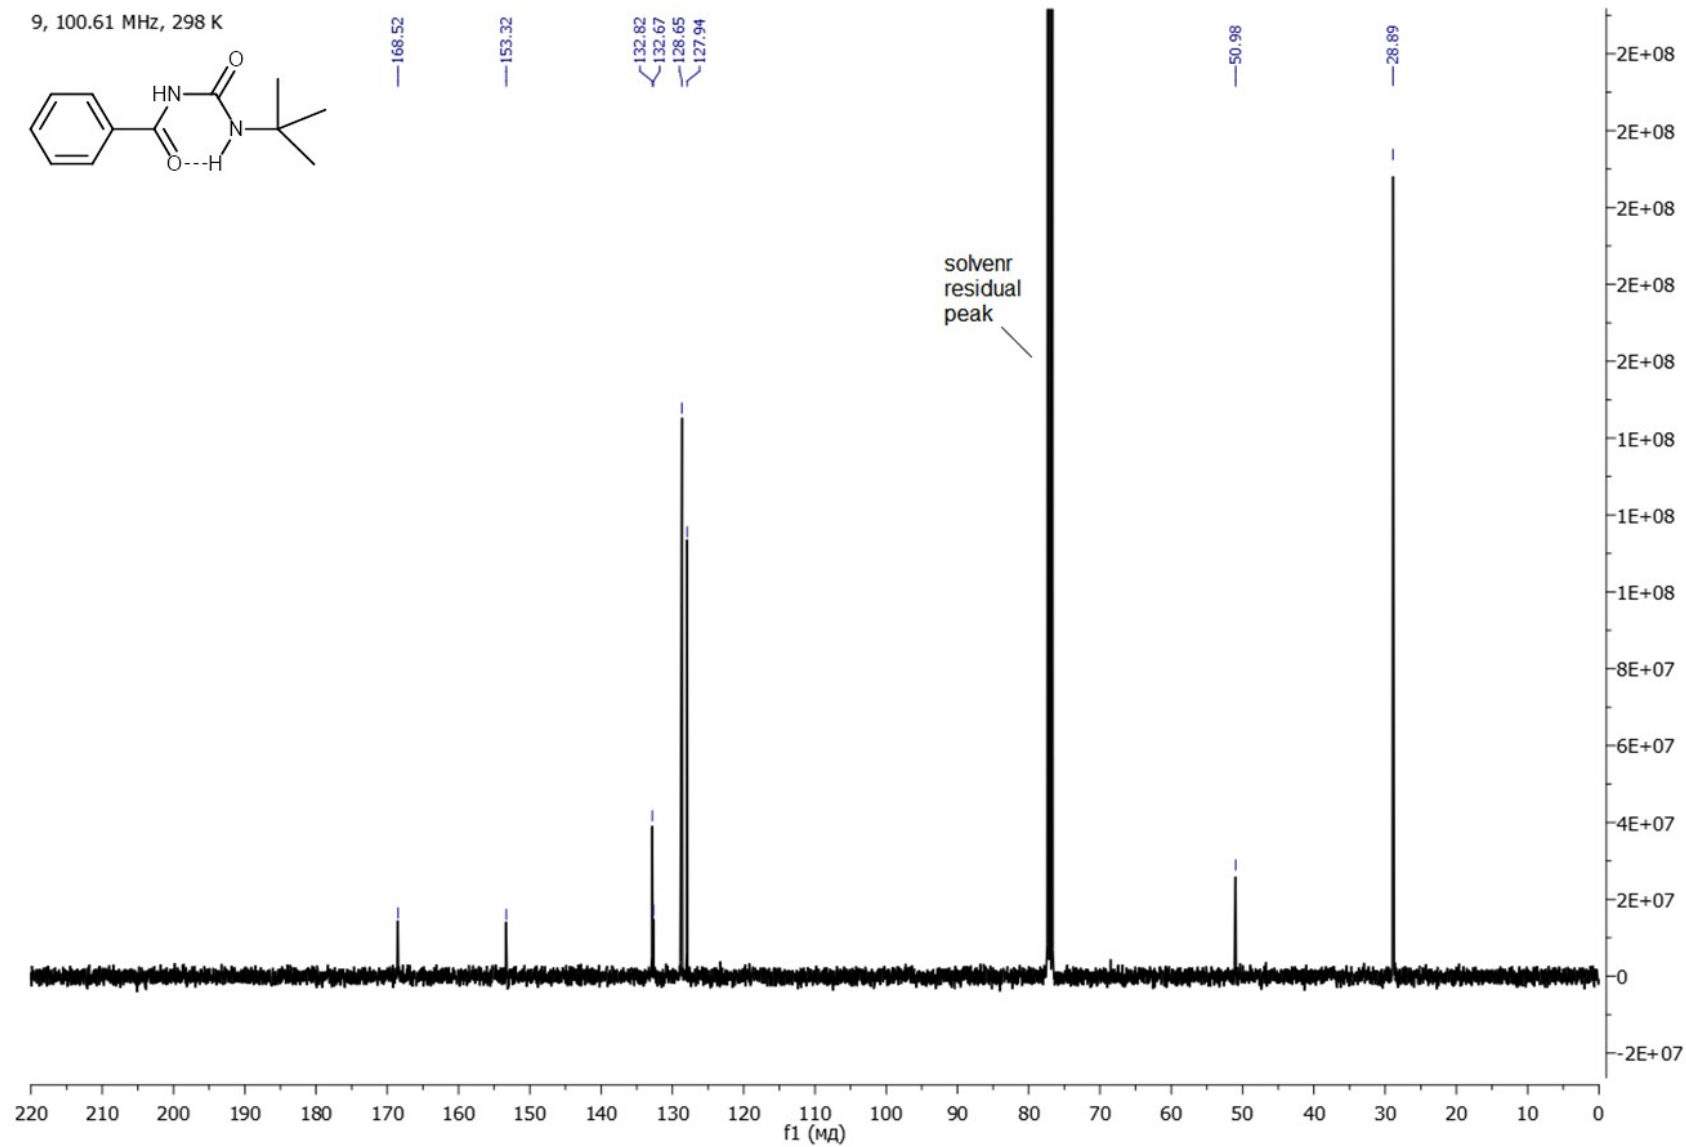

Figure 68S.  $^{13}\text{C}\{^1\text{H}\}$  NMR spectrum of **9**.

**Acquisition Parameter**

|             |            |                      |          |                  |           |
|-------------|------------|----------------------|----------|------------------|-----------|
| Source Type | ESI        | Ion Polarity         | Positive | Set Nebulizer    | 0.4 Bar   |
| Focus       | Not active |                      |          | Set Dry Heater   | 180 °C    |
| Scan Begin  | 50 m/z     | Set Capillary        | 4500 V   | Set Dry Gas      | 4.0 l/min |
| Scan End    | 3000 m/z   | Set End Plate Offset | -500 V   | Set Divert Valve | Source    |

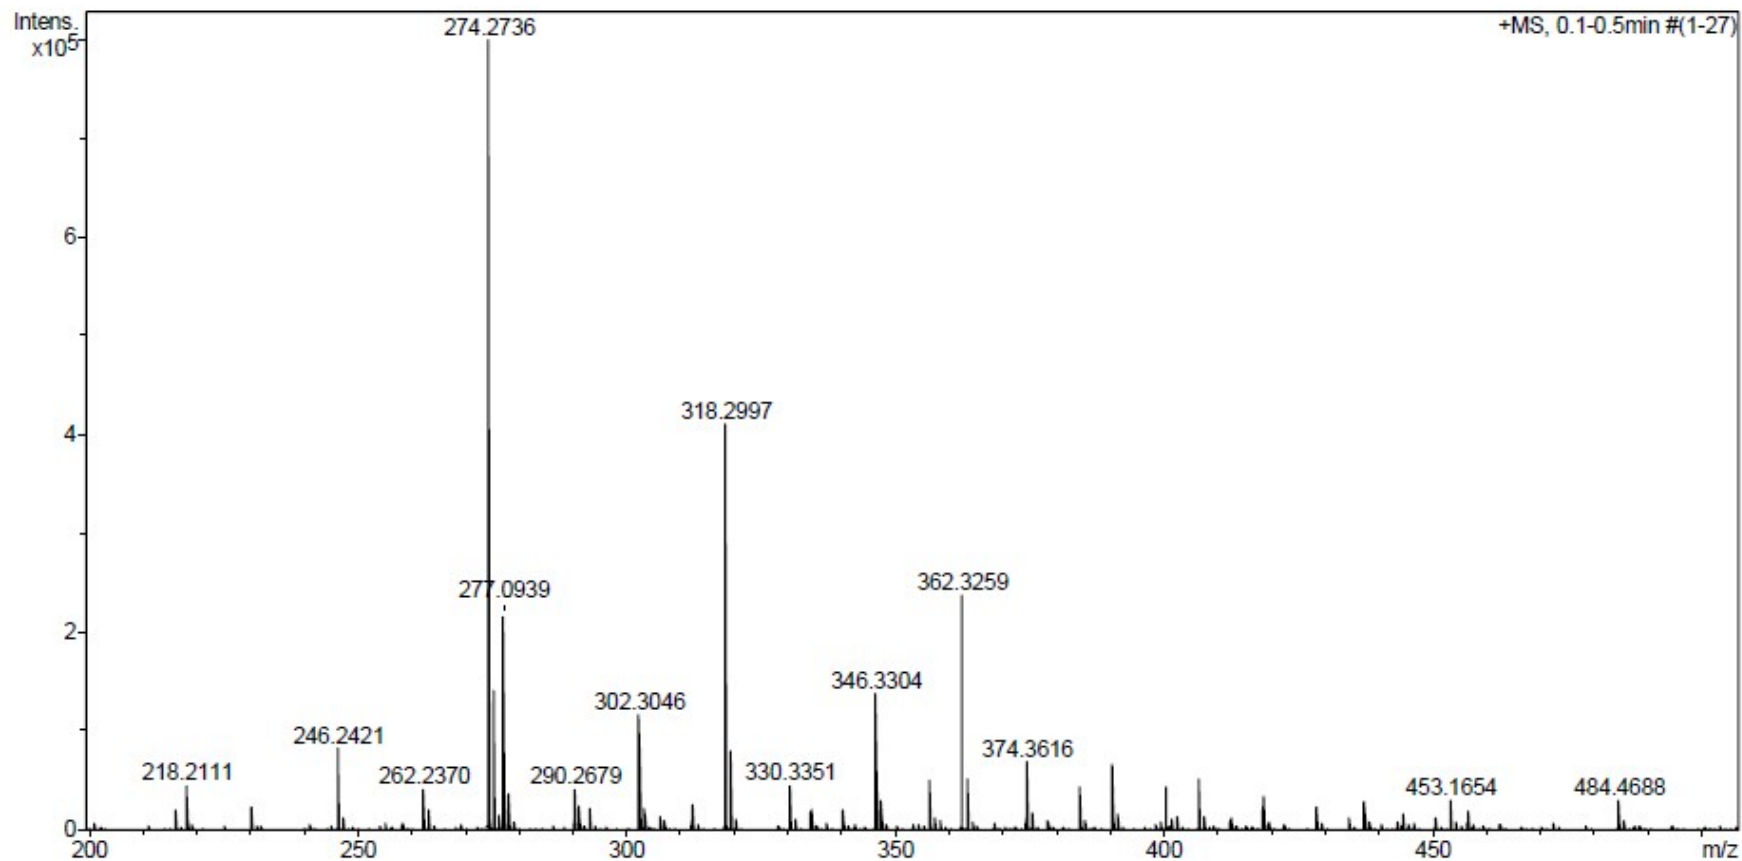

**Figure 69S.** HRESI<sup>+</sup>-MS of **10**.

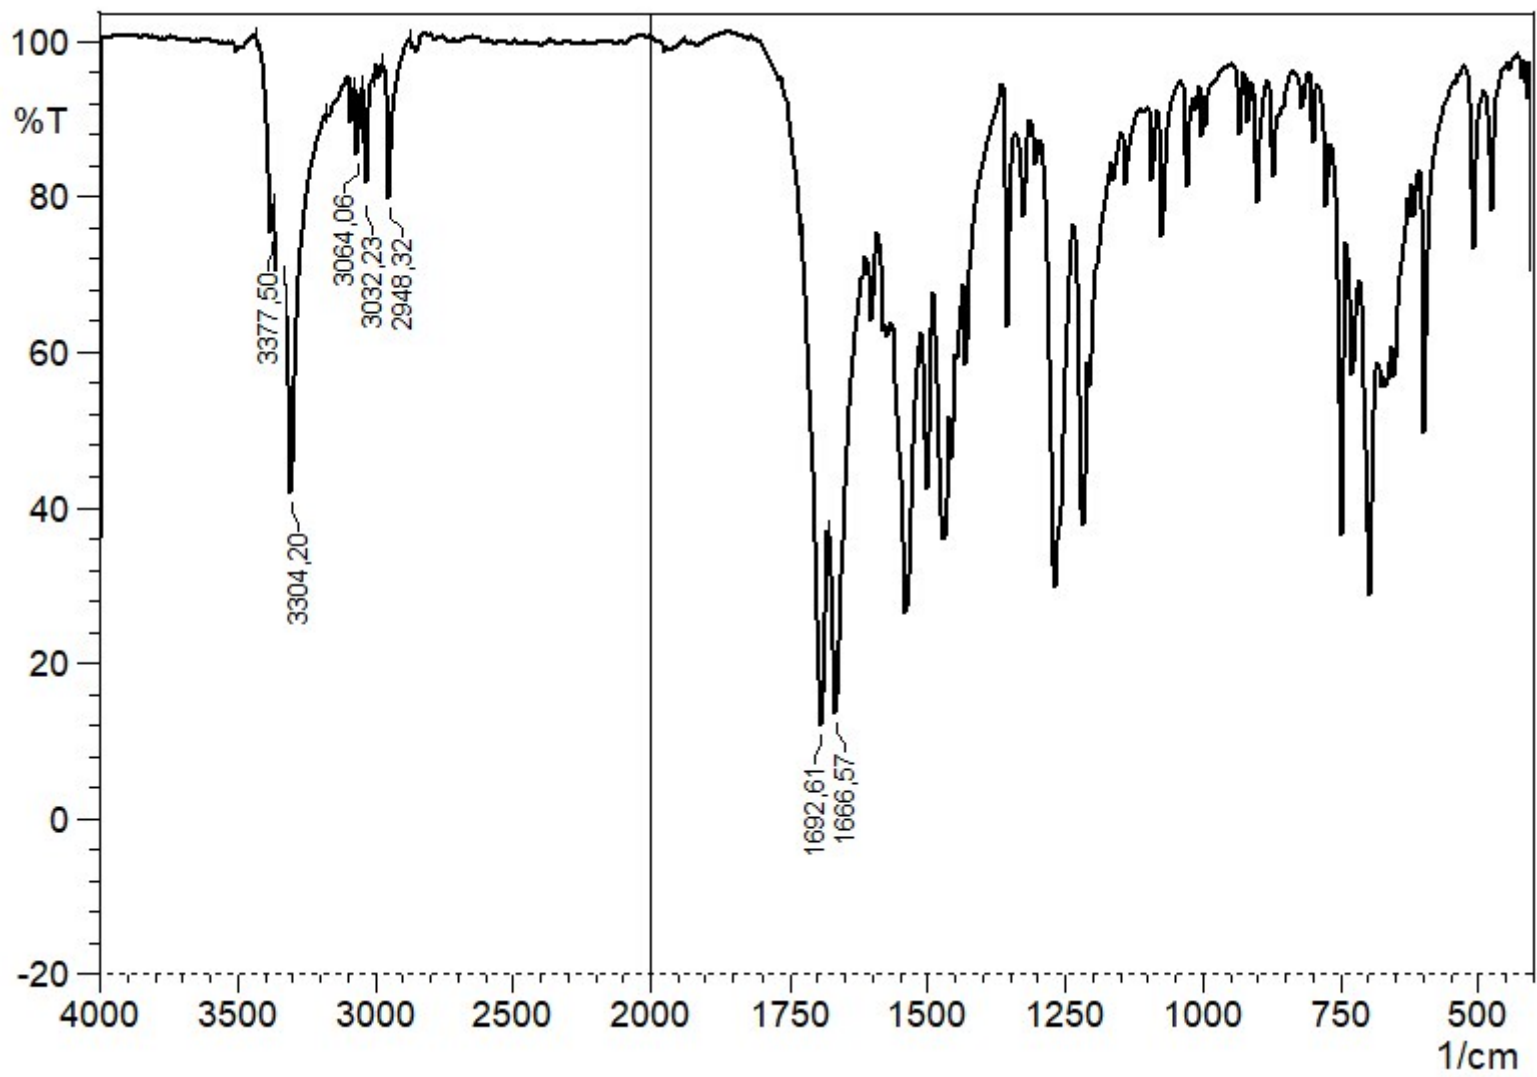

Figure 70S. IR spectrum of 10.

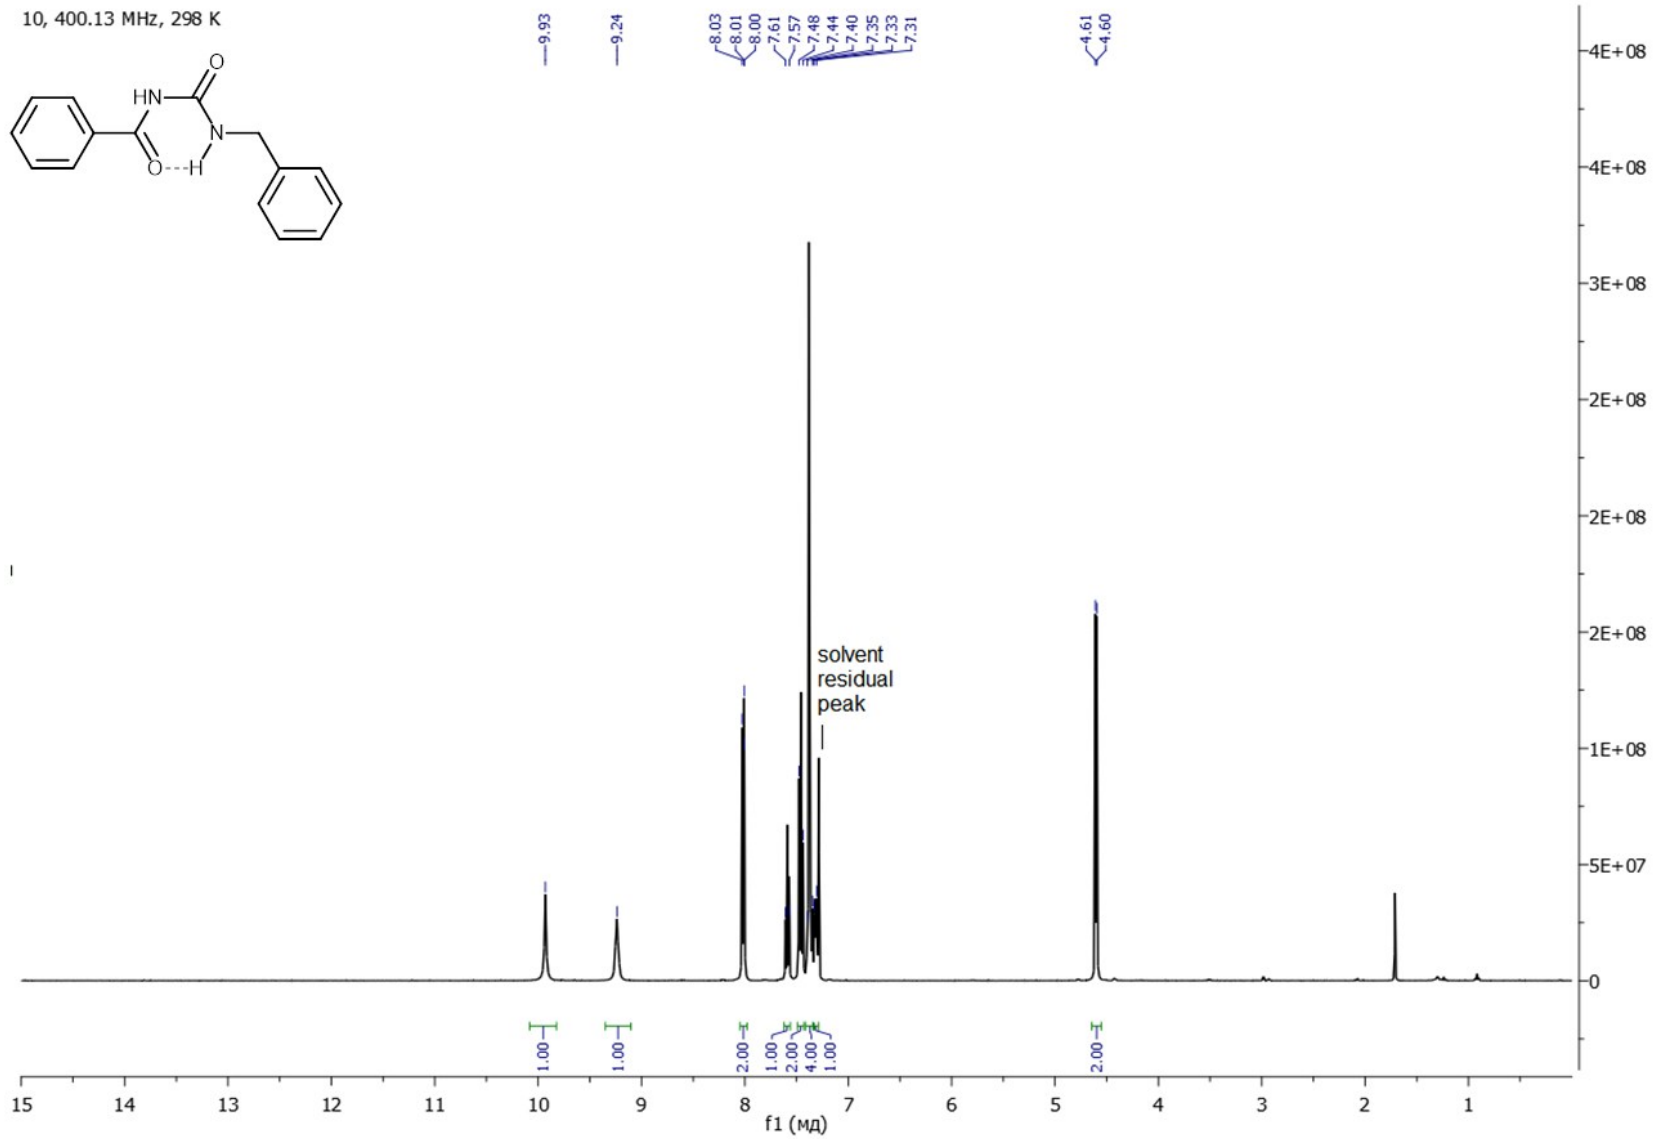

Figure 71S.  $^{13}\text{C}\{^1\text{H}\}$  NMR spectrum of 10.



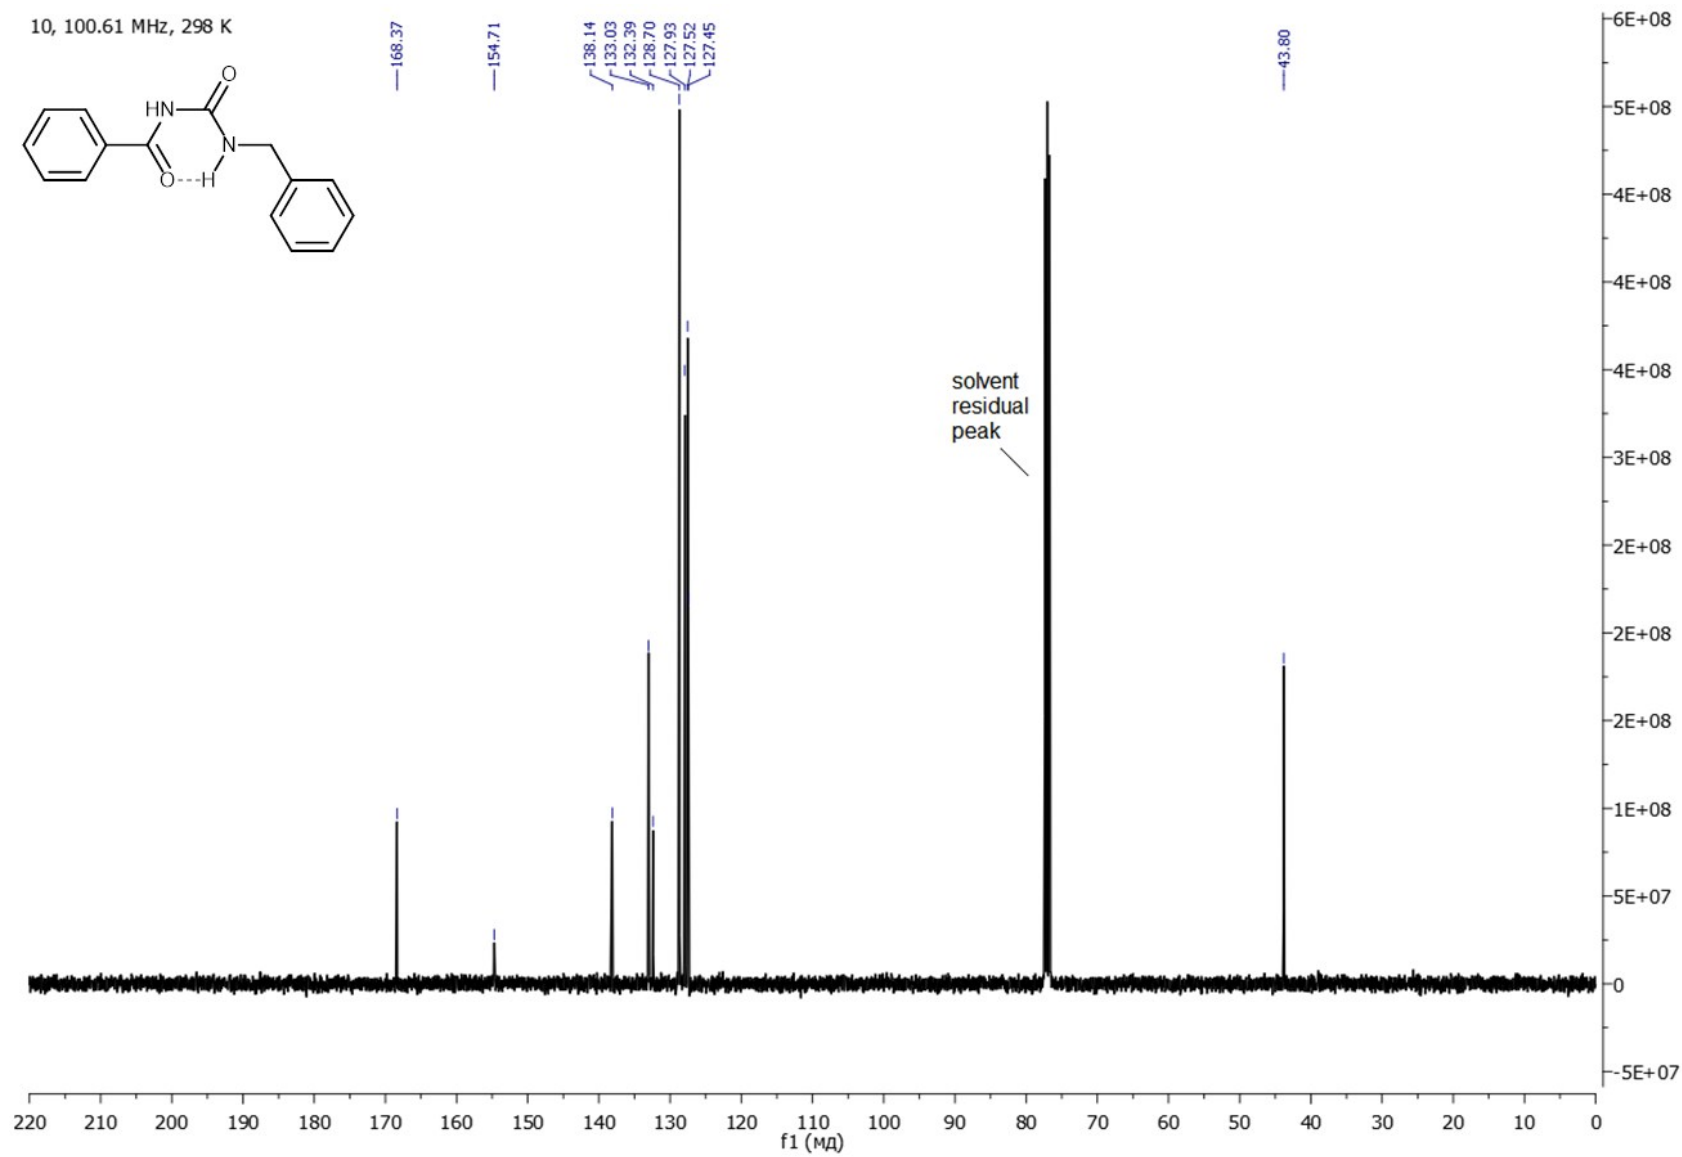

Figure 72S.  $^{13}\text{C}\{^1\text{H}\}$  NMR spectrum of 10.

**Acquisition Parameter**

|             |            |                      |          |                  |           |
|-------------|------------|----------------------|----------|------------------|-----------|
| Source Type | ESI        | Ion Polarity         | Positive | Set Nebulizer    | 0.4 Bar   |
| Focus       | Not active |                      |          | Set Dry Heater   | 180 °C    |
| Scan Begin  | 50 m/z     | Set Capillary        | 4500 V   | Set Dry Gas      | 4.0 l/min |
| Scan End    | 3000 m/z   | Set End Plate Offset | -500 V   | Set Divert Valve | Source    |

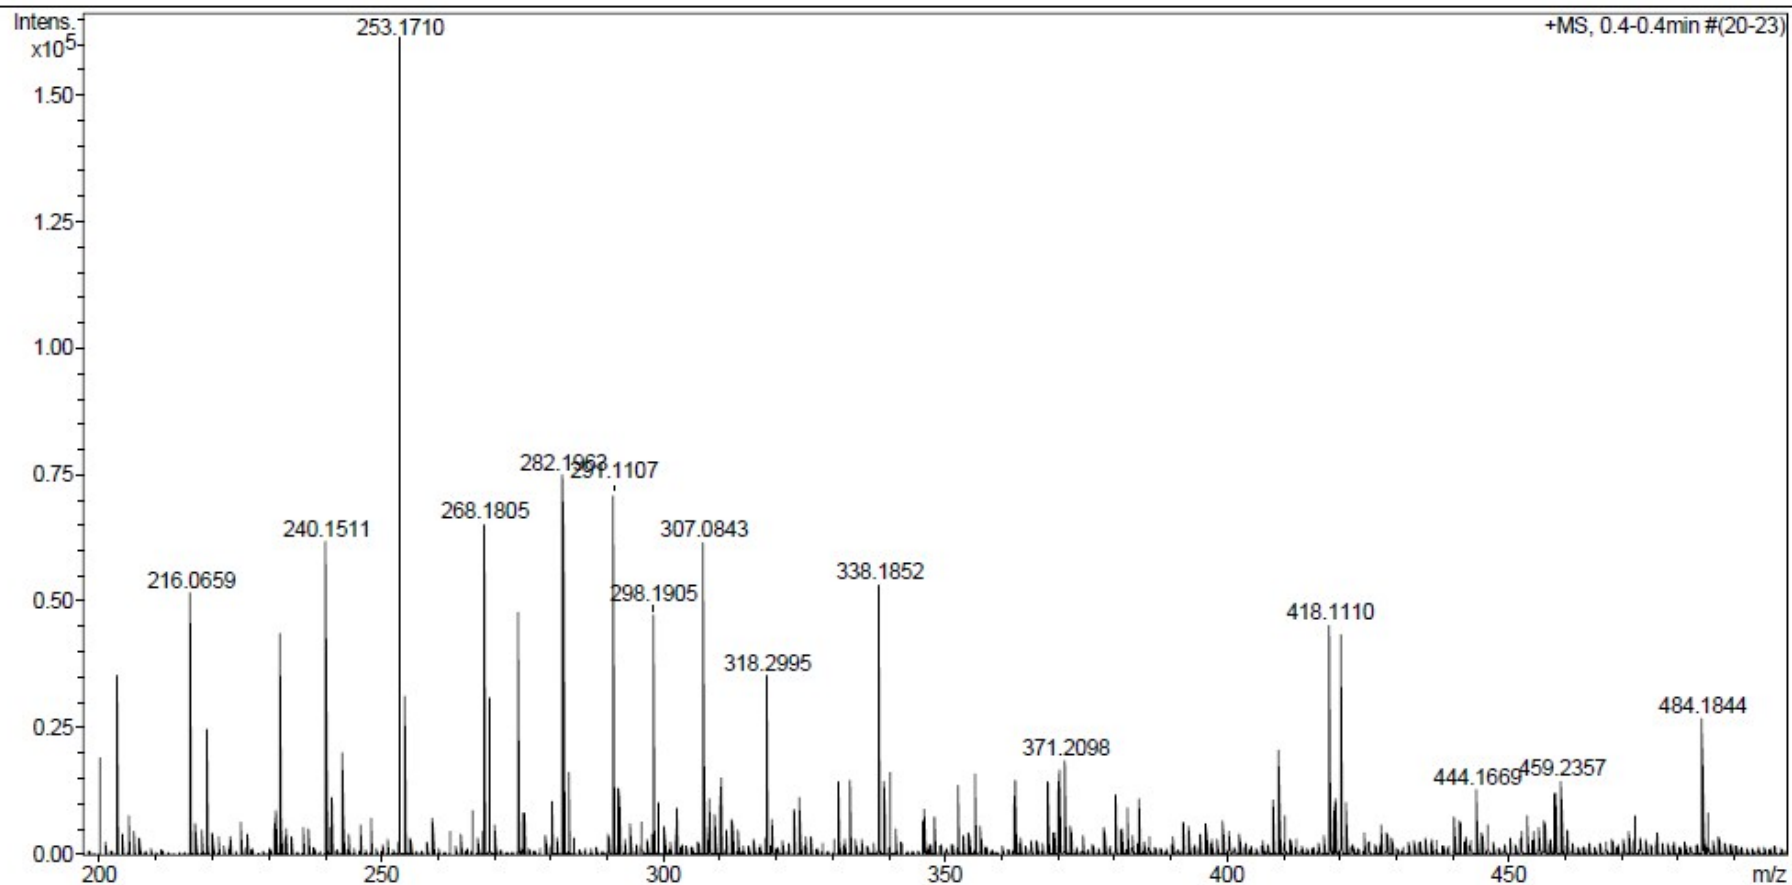

**Figure 73S.** HRESI<sup>+</sup>-MS of 11.

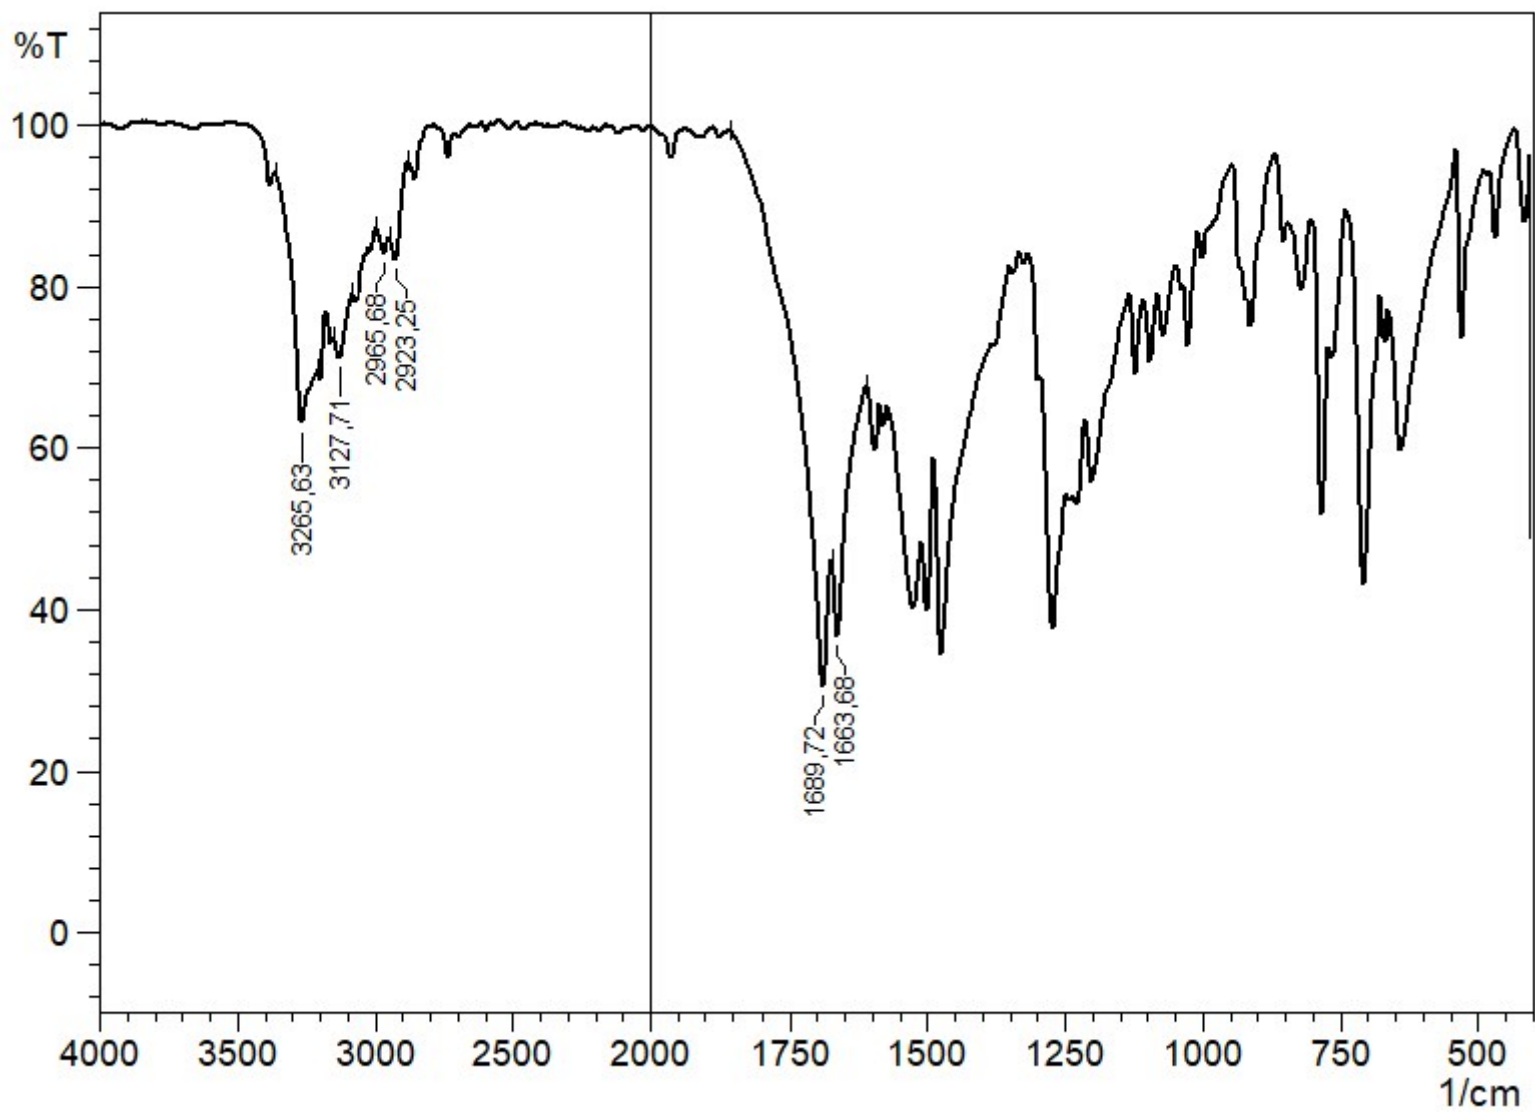

Figure 74S. IR spectrum of 11.

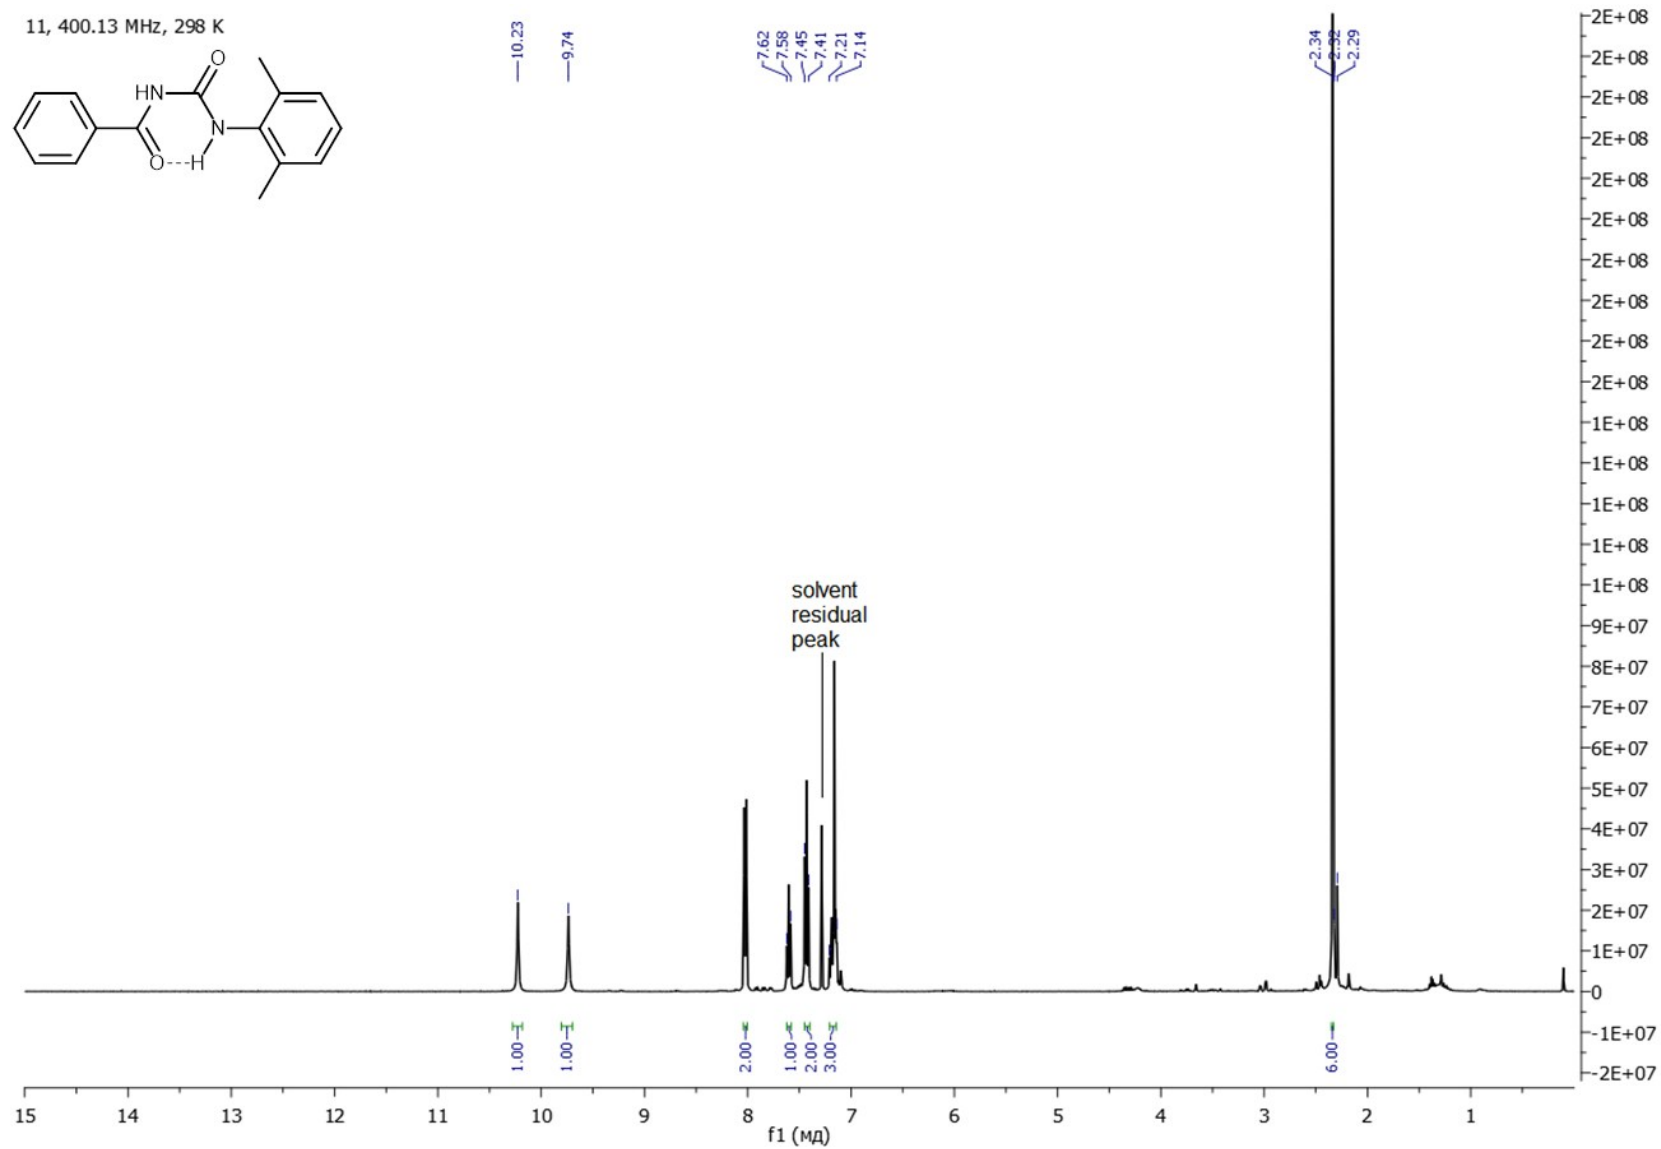

**Figure 75S.**  $^{13}\text{C}\{^1\text{H}\}$  NMR spectrum of 11.

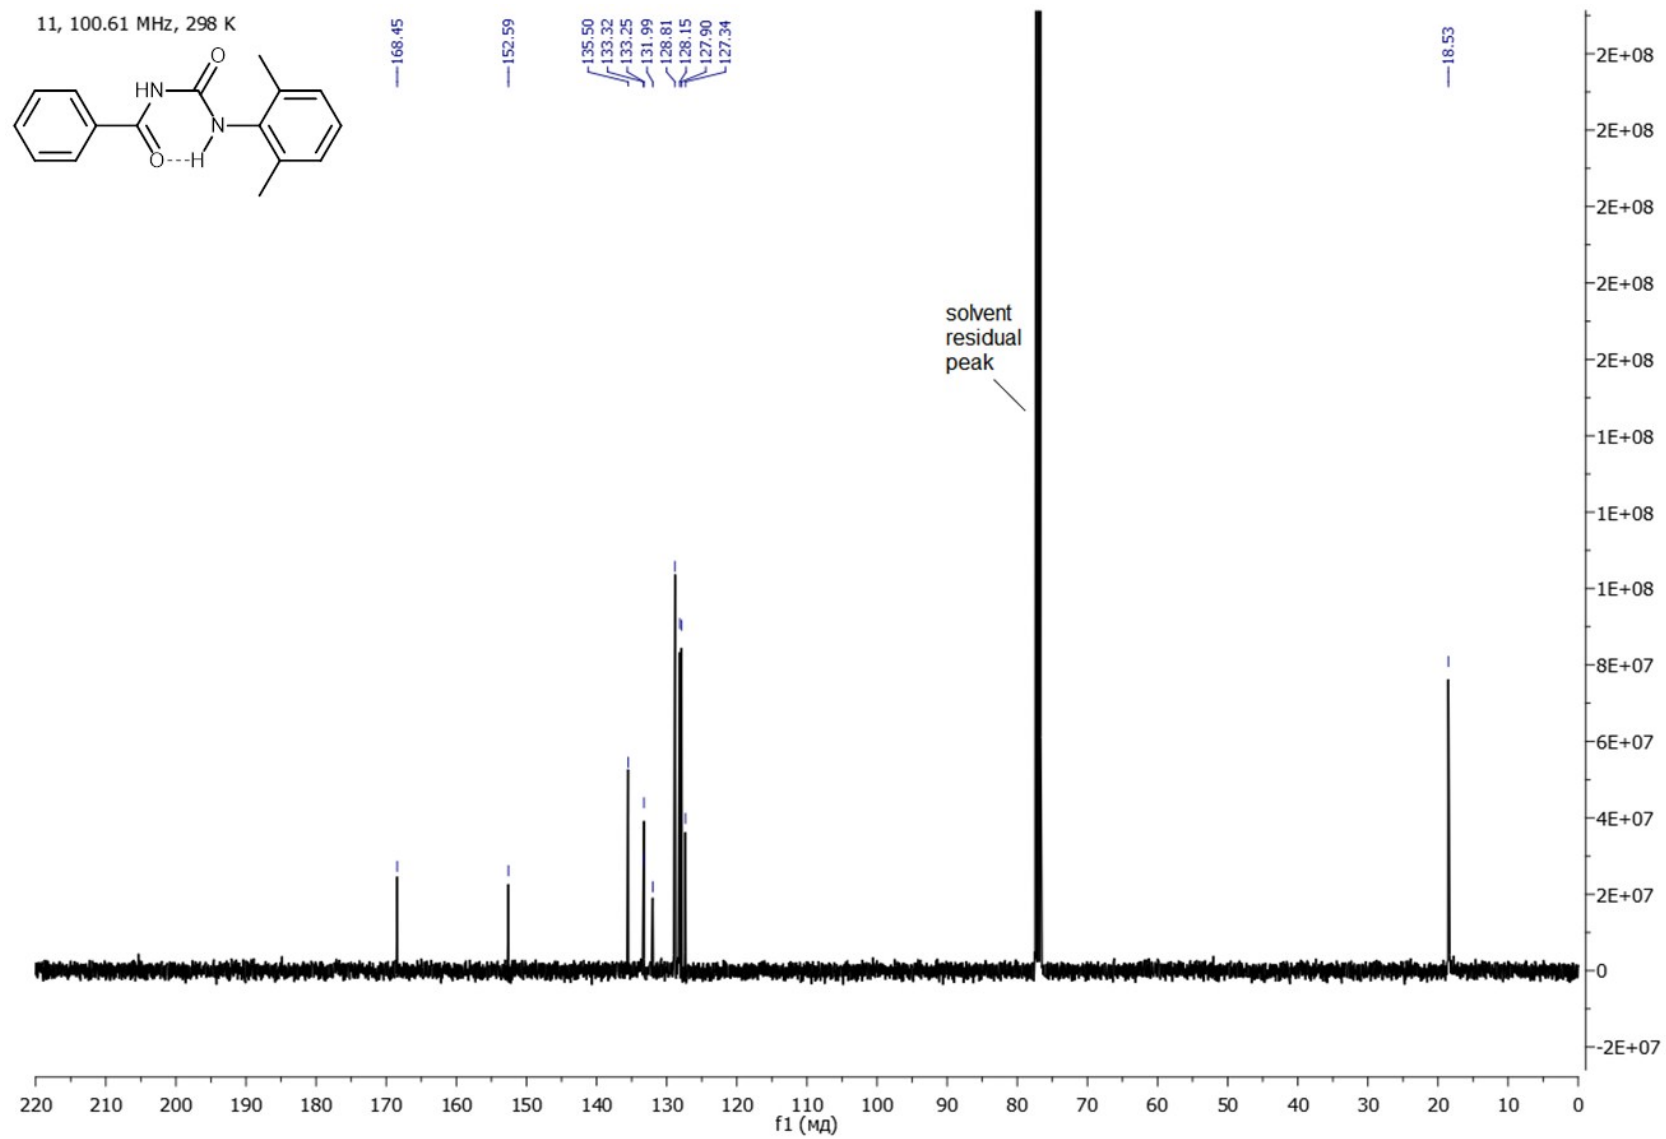

Figure 76S.  $^{13}\text{C}\{^1\text{H}\}$  NMR spectrum of **11**.

**Acquisition Parameter**

|             |            |                      |          |                  |           |
|-------------|------------|----------------------|----------|------------------|-----------|
| Source Type | ESI        | Ion Polarity         | Positive | Set Nebulizer    | 0.4 Bar   |
| Focus       | Not active |                      |          | Set Dry Heater   | 180 °C    |
| Scan Begin  | 50 m/z     | Set Capillary        | 4500 V   | Set Dry Gas      | 4.0 l/min |
| Scan End    | 3000 m/z   | Set End Plate Offset | -500 V   | Set Divert Valve | Source    |

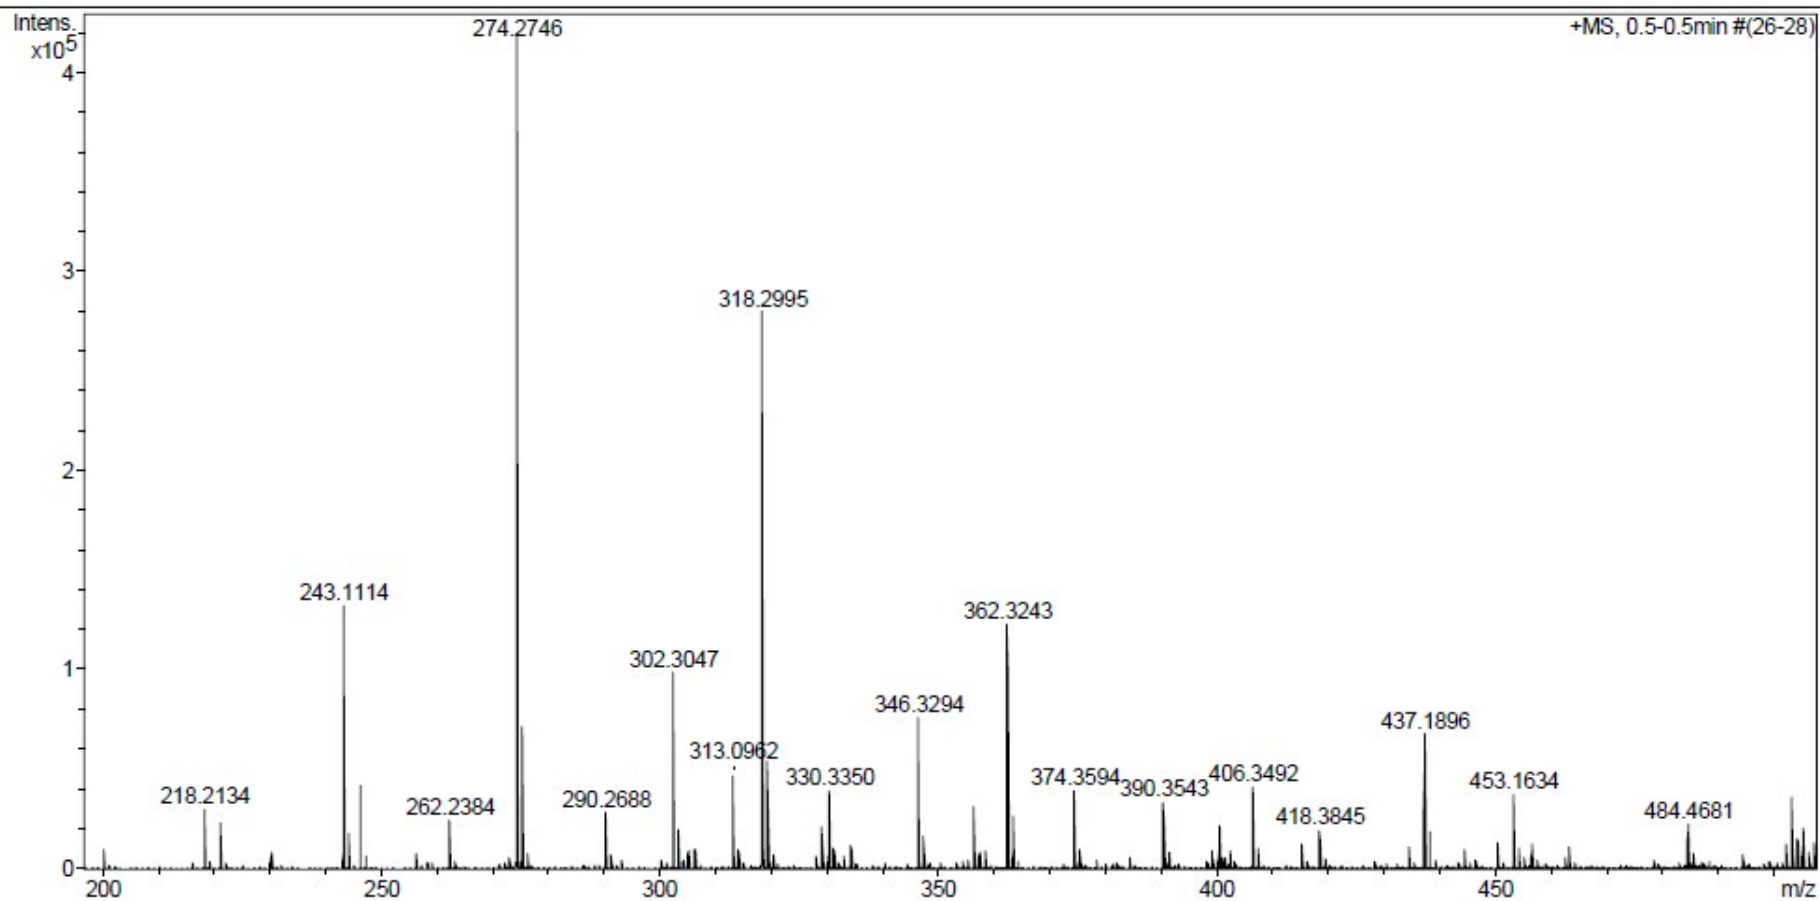

**Figure 77S.** HRESI<sup>+</sup>-MS of 12.

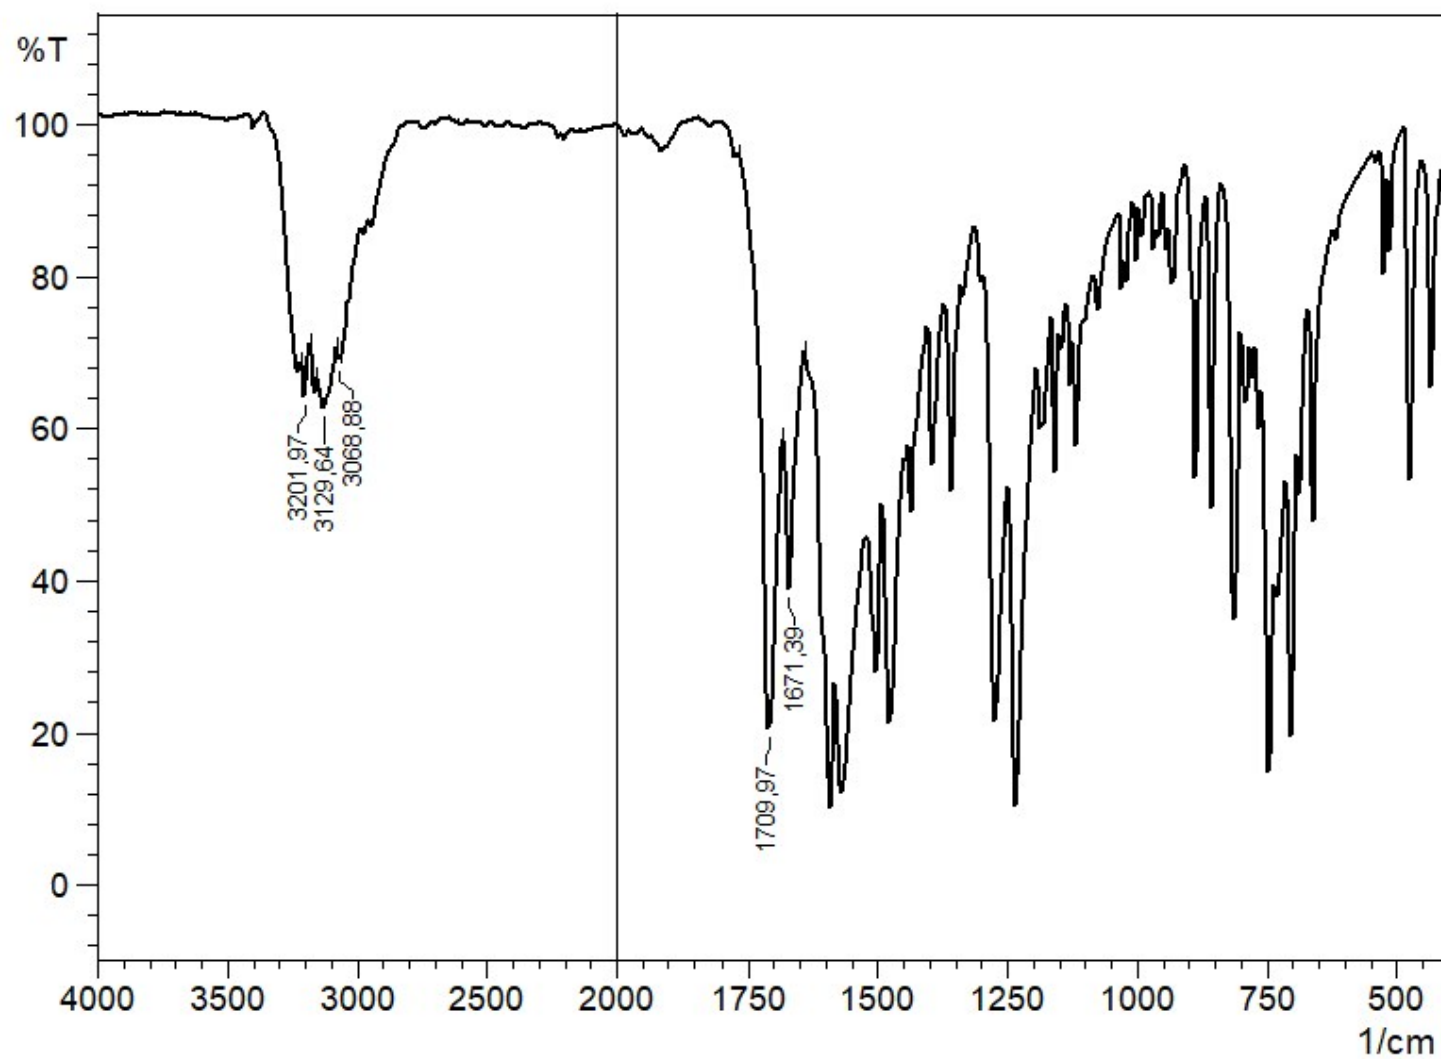

**Figure 78S.** IR spectrum of **12**.

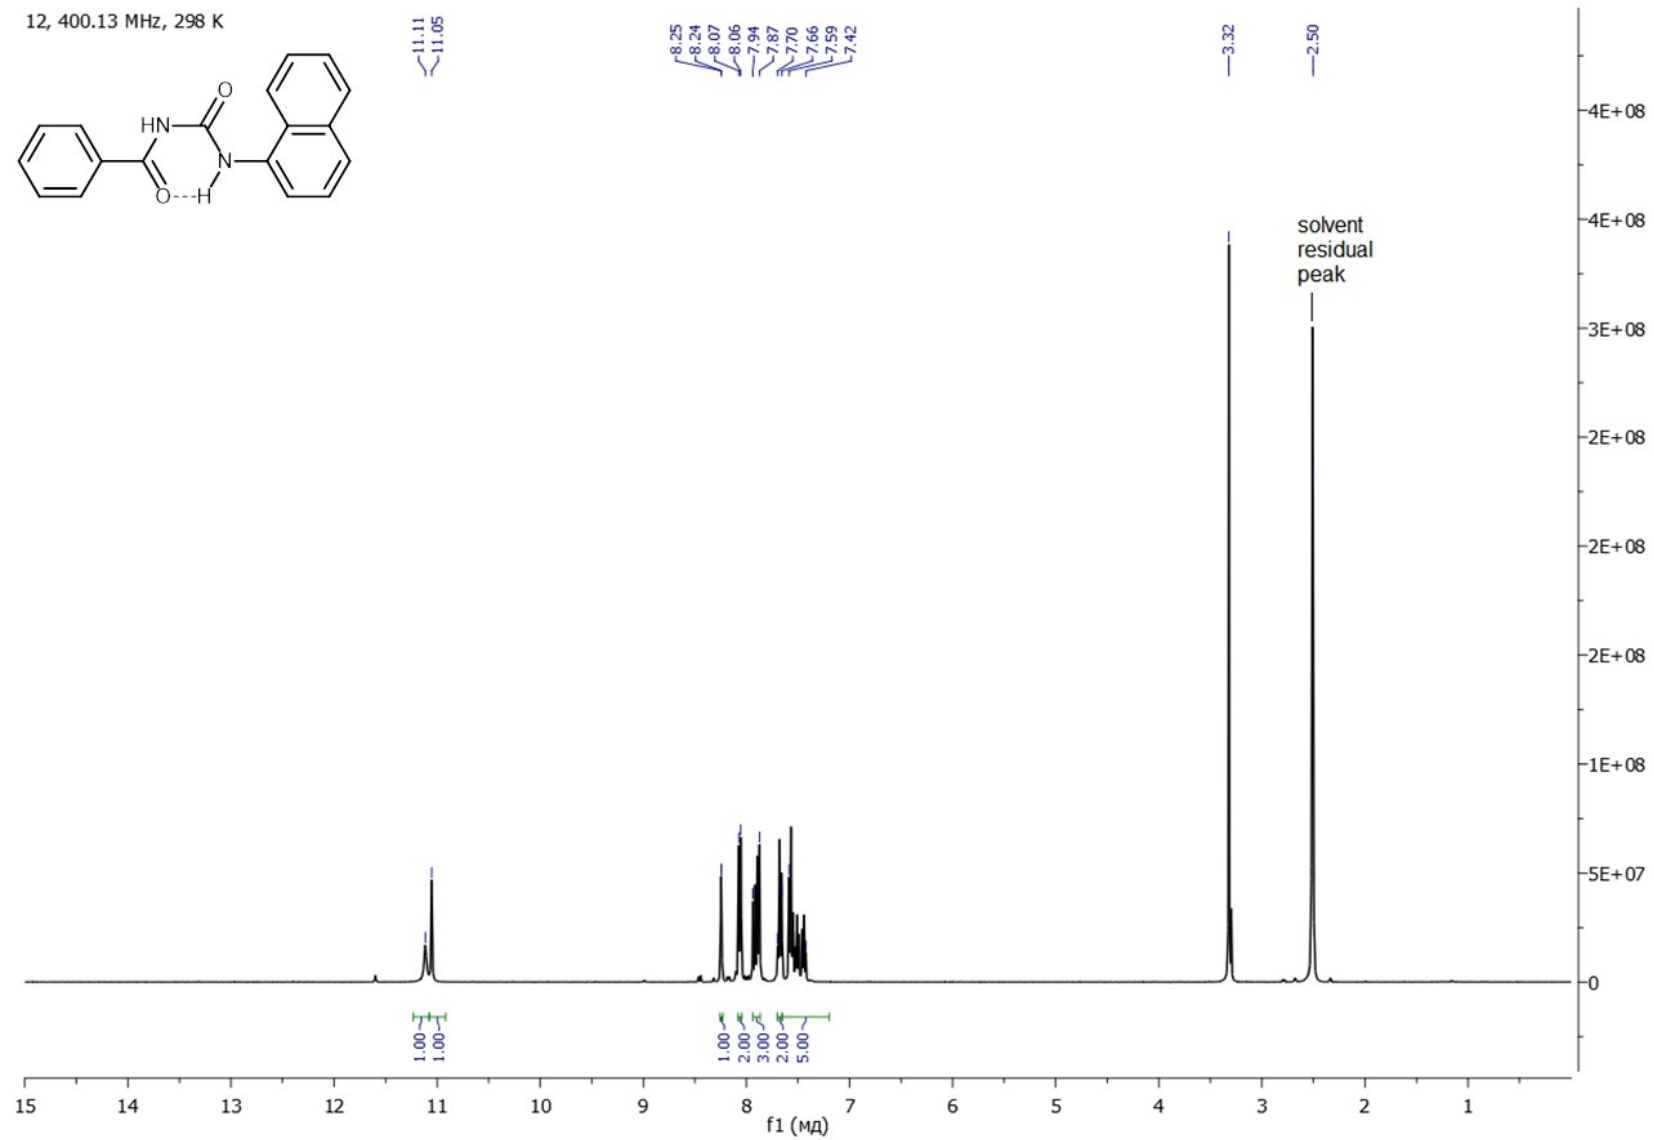

Figure 79S.  $^1\text{H}$  NMR spectrum of 12.



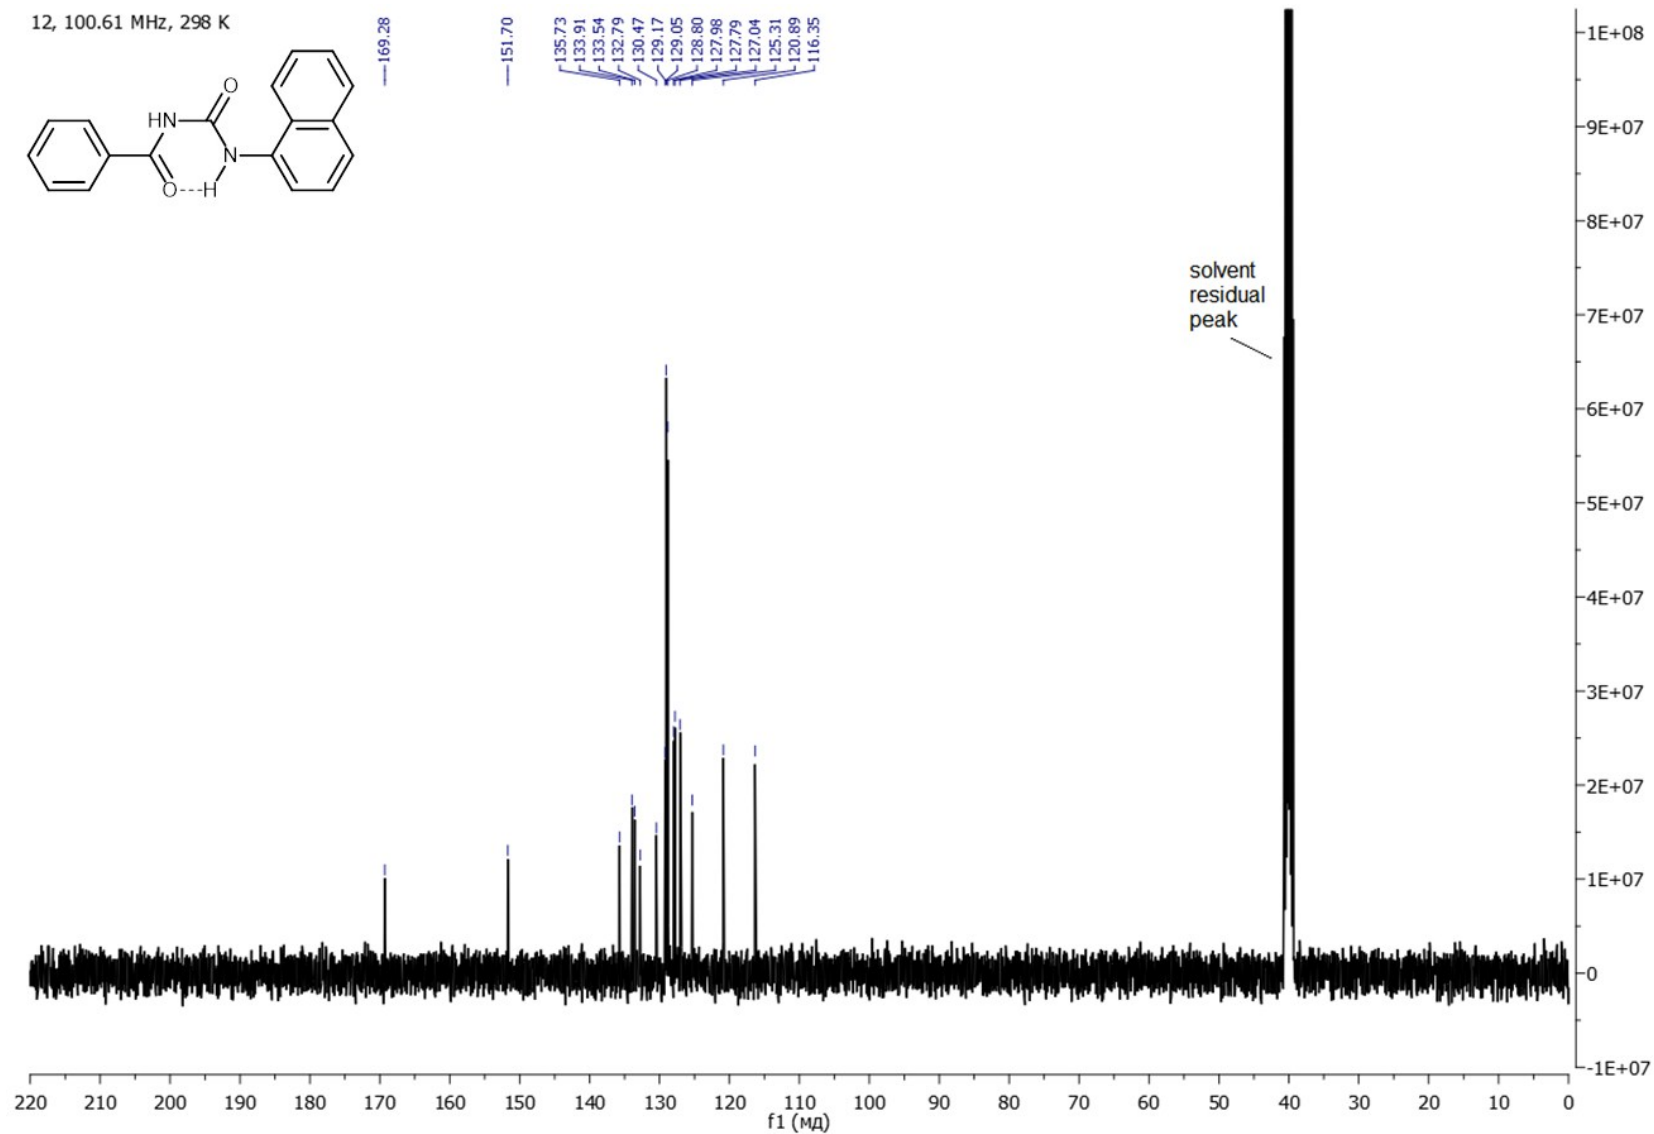

Figure 80S.  $^{13}\text{C}\{^1\text{H}\}$  NMR spectrum of 12.

## Computational Details

### Hirshfeld surface analysis

The molecular Hirshfeld surface (visualization of short interatomic contacts using sums of appropriate vdW radii) represents an area where molecules come into contacts, and its analysis gives the possibility of an additional insight into the nature of intermolecular interactions in the crystal state. We carried out the Hirshfeld surface analysis for the X-ray structures of **3** and **10** to understand what kind of intermolecular contacts gives the largest contributions in crystal packing (**Table 3**). For the visualization, we have used a mapping of the normalized contact distance ( $d_{\text{norm}}$ ); its negative value enables identification of molecular regions of substantial importance for detection of short contacts. **Figure 3** depicts the Hirshfeld surfaces for **3** and **10**. In these Hirshfeld surfaces, the regions of shortest intermolecular contacts N–H $\cdots$ O and C–H $\cdots$ O visualized by red circle areas. The Hirshfeld surface analysis for the X-ray structures of **3** and **10** reveals that in both cases the intermolecular contacts involving hydrogen atoms (viz. H–H, F–H, C–H, and O–H) give the largest contribution in the crystal packing.

| NOS       | Contributions of different intermolecular contacts to the molecular Hirshfeld surface                                     |
|-----------|---------------------------------------------------------------------------------------------------------------------------|
| <b>3</b>  | H–H 39.7%, F–H 25.9%, O–H 13.3%, C–H 7.5%, C–C 3.1%, F–C 3.1%, F–O 1.6%, N–C 1.6%, O–C 1.4%, N–H 1.3%, F–F 1.3%, O–N 0.2% |
| <b>10</b> | H–H 47.1%, C–H 26.0%, O–H 17.7%, C–C 4.2%, N–H 1.9%, N–C 1.7%, O–C 0.9%, O–N 0.5%                                         |

**Table S1.** Calculated total electronic energies, enthalpies, Gibbs free energies (Hartree), and entropies (cal/mol•K) for optimized equilibrium model structures (E, H, G, and S, respectively), M06-2X/6-31G\* level of theory.

| Model structure        | E              | H           | G           | S       |
|------------------------|----------------|-------------|-------------|---------|
| H <sub>2</sub> O       | -76.3733781405 | -76.348061  | -76.369495  | 45.112  |
| <b>A</b>               | -822.527483125 | -822.168380 | -822.232494 | 134.939 |
| <b>TS<sub>AB</sub></b> | -975.275074078 | -974.865498 | -974.933197 | 142.484 |
| <b>TS<sub>AC</sub></b> | -975.271690804 | -974.860784 | -974.931302 | 148.417 |
| <b>B</b>               | -898.912884387 | -898.524885 | -898.589933 | 136.904 |
| <b>C</b>               | -898.907819798 | -898.520327 | -898.588103 | 142.647 |
| <b>D</b>               | -782.865707243 | -782.549657 | -782.609628 | 126.221 |
| <b>TS<sub>DE</sub></b> | -935.576570724 | -935.211994 | -935.277991 | 138.904 |
| <b>TS<sub>DF</sub></b> | -935.590881517 | -935.224398 | -935.291924 | 142.122 |
| <b>E</b>               | -859.229474358 | -858.884346 | -858.948071 | 134.121 |
| <b>F</b>               | -859.232575226 | -858.888258 | -858.951049 | 132.156 |

**Table S2.** Calculated values of Gibbs free energies of activation ( $\Delta G^\ddagger$ ) and reaction ( $\Delta G$ ) in kcal/mol, M06-2X/6-31G\* level of theory.

| Transformation                                             | $\Delta G^\ddagger$ | $\Delta G$ |
|------------------------------------------------------------|---------------------|------------|
| <b>A</b> + 2H <sub>2</sub> O → <b>B</b> + H <sub>2</sub> O | 24.0                | 7.6        |
| <b>A</b> + 2H <sub>2</sub> O → <b>C</b> + H <sub>2</sub> O | 25.2                | 8.7        |
| <b>D</b> + 2H <sub>2</sub> O → <b>E</b> + H <sub>2</sub> O | 44.3                | 19.5       |
| <b>D</b> + 2H <sub>2</sub> O → <b>F</b> + H <sub>2</sub> O | 35.6                | 17.6       |

**Table S3.** Cartesian atomic coordinates for optimized equilibrium model structures (M06-2X/6-31G\* level of theory).

| Atomic charge    | X         | Y         | Z         |
|------------------|-----------|-----------|-----------|
| H <sub>2</sub> O |           |           |           |
| 8                | 0.000000  | 0.000000  | 0.118471  |
| 1                | 0.000000  | -0.762395 | -0.473883 |
| 1                | 0.000000  | 0.762395  | -0.473883 |
| <b>A</b>         |           |           |           |
| 7                | -1.028929 | 1.099882  | 0.413669  |
| 6                | -1.656241 | -0.028086 | 0.050729  |
| 7                | -0.785722 | -1.009094 | -0.196946 |
| 6                | 0.402402  | -0.460372 | 0.031375  |
| 8                | 0.330613  | 0.834334  | 0.410936  |
| 6                | -3.103377 | -0.151890 | -0.072352 |
| 7                | 1.585865  | -1.013191 | -0.075494 |
| 6                | 2.870902  | -0.321002 | 0.155941  |
| 6                | -3.901065 | 0.939582  | -0.441936 |
| 6                | -5.274299 | 0.772562  | -0.557593 |
| 6                | -5.847539 | -0.473373 | -0.305312 |
| 6                | -5.049886 | -1.562858 | 0.043443  |
| 6                | -3.674556 | -1.410526 | 0.152103  |
| 6                | 3.292101  | 0.486533  | -1.074428 |
| 6                | 4.642117  | 1.165560  | -0.824041 |
| 6                | 5.710717  | 0.140983  | -0.437266 |
| 6                | 5.275747  | -0.674361 | 0.782006  |
| 6                | 3.925248  | -1.356281 | 0.542329  |

|                        |           |           |           |
|------------------------|-----------|-----------|-----------|
| 6                      | -1.408827 | 2.300332  | 1.141038  |
| 1                      | 1.589470  | -1.971967 | -0.408998 |
| 1                      | 2.710385  | 0.358858  | 1.002681  |
| 1                      | -3.450400 | 1.897710  | -0.685293 |
| 1                      | -5.895974 | 1.609457  | -0.856192 |
| 1                      | -6.921752 | -0.599083 | -0.394901 |
| 1                      | -5.500952 | -2.532380 | 0.224579  |
| 1                      | -3.036964 | -2.248721 | 0.413438  |
| 1                      | 3.371678  | -0.198204 | -1.929280 |
| 1                      | 2.521189  | 1.226883  | -1.317526 |
| 1                      | 4.942326  | 1.719623  | -1.717990 |
| 1                      | 4.532503  | 1.903032  | -0.017290 |
| 1                      | 5.887996  | -0.536302 | -1.283464 |
| 1                      | 6.659410  | 0.645552  | -0.232262 |
| 1                      | 6.024968  | -1.432223 | 1.027767  |
| 1                      | 5.195282  | -0.013963 | 1.655684  |
| 1                      | 4.025137  | -2.080508 | -0.279707 |
| 1                      | 3.601294  | -1.906819 | 1.431909  |
| 1                      | -0.817402 | 2.347978  | 2.057082  |
| 1                      | -2.465473 | 2.206957  | 1.390625  |
| 1                      | -1.236782 | 3.185457  | 0.526824  |
| <b>TS<sub>AB</sub></b> |           |           |           |
| 7                      | 0.795468  | -1.074125 | 0.848085  |
| 6                      | 1.505529  | 0.103534  | 0.439113  |
| 7                      | 0.581055  | 0.830562  | -0.358270 |
| 6                      | -0.598055 | 0.367835  | -0.010959 |
| 8                      | -0.582589 | -0.669151 | 0.817007  |
| 6                      | 2.858520  | -0.173774 | -0.176154 |
| 7                      | -1.773704 | 0.830179  | -0.395812 |
| 6                      | -3.069719 | 0.213292  | -0.029412 |
| 6                      | 3.955983  | -0.544812 | 0.607012  |
| 6                      | 5.181101  | -0.809747 | 0.014874  |
| 6                      | 5.328312  | -0.700428 | -1.371771 |
| 6                      | 4.236706  | -0.334782 | -2.153872 |
| 6                      | 2.997510  | -0.075586 | -1.554969 |
| 6                      | -3.355846 | -1.065644 | -0.839469 |
| 6                      | -4.710349 | -1.662841 | -0.441468 |
| 6                      | -5.835186 | -0.638649 | -0.611766 |
| 6                      | -5.538729 | 0.652054  | 0.168560  |
| 6                      | -4.172532 | 1.252457  | -0.218588 |
| 6                      | 1.064397  | -1.671095 | 2.146183  |
| 1                      | -1.774648 | 1.605838  | -1.042786 |
| 1                      | -3.008248 | -0.044375 | 1.046100  |
| 1                      | 3.876657  | -0.659109 | 1.693802  |
| 1                      | 6.031709  | -1.105702 | 0.625175  |
| 1                      | 6.281062  | -0.913310 | -1.837679 |
| 1                      | 4.338681  | -0.255816 | -3.237185 |
| 1                      | 2.142059  | 0.202989  | -2.162564 |
| 1                      | -3.358604 | -0.805315 | -1.916849 |
| 1                      | -2.546752 | -1.797477 | -0.686869 |

|                        |           |           |           |
|------------------------|-----------|-----------|-----------|
| 1                      | -4.915135 | -2.564464 | -1.035517 |
| 1                      | -4.672223 | -1.981828 | 0.614065  |
| 1                      | -5.940538 | -0.396633 | -1.682663 |
| 1                      | -6.795884 | -1.069998 | -0.287697 |
| 1                      | -6.316303 | 1.408138  | 0.003940  |
| 1                      | -5.542609 | 0.431729  | 1.257744  |
| 1                      | -4.188945 | 1.548921  | -1.284255 |
| 1                      | -3.955397 | 2.150322  | 0.377587  |
| 1                      | 0.391537  | -2.526473 | 2.259624  |
| 1                      | 0.914802  | -0.973443 | 2.973984  |
| 1                      | 2.085445  | -2.049280 | 2.120002  |
| 8                      | 1.750202  | 1.046115  | 1.669012  |
| 1                      | 1.828057  | 2.189120  | 1.141627  |
| 1                      | 2.582382  | 0.813718  | 2.124346  |
| 8                      | 1.659074  | 3.047946  | 0.366788  |
| 1                      | 2.482321  | 3.359783  | -0.058857 |
| 1                      | 1.141502  | 2.456182  | -0.289444 |
| <b>TS<sub>AC</sub></b> |           |           |           |
| 7                      | -1.151190 | -1.275695 | -0.772010 |
| 6                      | -1.689233 | -0.183568 | -0.141257 |
| 7                      | -0.834877 | 0.773198  | 0.065652  |
| 6                      | 0.427235  | 0.314267  | -0.431426 |
| 8                      | 0.241419  | -1.031912 | -0.835240 |
| 6                      | -3.119143 | -0.105356 | 0.176296  |
| 7                      | 1.498006  | 0.621653  | 0.394717  |
| 6                      | 2.859282  | 0.167194  | 0.048353  |
| 6                      | -4.069888 | -0.734797 | -0.635735 |
| 6                      | -5.419587 | -0.618142 | -0.326878 |
| 6                      | -5.818932 | 0.118560  | 0.787153  |
| 6                      | -4.871377 | 0.750312  | 1.591379  |
| 6                      | -3.520410 | 0.646059  | 1.285711  |
| 6                      | 3.159444  | -1.256840 | 0.529337  |
| 6                      | 4.598495  | -1.656815 | 0.188512  |
| 6                      | 5.604054  | -0.660113 | 0.768448  |
| 6                      | 5.302130  | 0.761089  | 0.288949  |
| 6                      | 3.865250  | 1.164434  | 0.625141  |
| 6                      | -1.386699 | -2.658509 | -0.357517 |
| 1                      | 1.256248  | 0.461682  | 1.368871  |
| 1                      | 2.927010  | 0.197233  | -1.046352 |
| 1                      | -3.756600 | -1.283717 | -1.519476 |
| 1                      | -6.160584 | -1.095527 | -0.959130 |
| 1                      | -6.873846 | 0.203838  | 1.027104  |
| 1                      | -5.185596 | 1.321852  | 2.458166  |
| 1                      | -2.770040 | 1.125901  | 1.906353  |
| 1                      | 3.022806  | -1.290234 | 1.621032  |
| 1                      | 2.445693  | -1.962125 | 0.090765  |
| 1                      | 4.798510  | -2.666761 | 0.559554  |
| 1                      | 4.711791  | -1.693570 | -0.903706 |
| 1                      | 5.552420  | -0.691686 | 1.865340  |
| 1                      | 6.623301  | -0.945916 | 0.490987  |

|          |           |           |           |
|----------|-----------|-----------|-----------|
| 1        | 6.001354  | 1.475349  | 0.734072  |
| 1        | 5.446026  | 0.814909  | -0.798975 |
| 1        | 3.739151  | 1.193743  | 1.717679  |
| 1        | 3.635535  | 2.166716  | 0.249016  |
| 1        | -0.844574 | -2.872622 | 0.568151  |
| 1        | -1.046889 | -3.320080 | -1.153815 |
| 1        | -2.457449 | -2.788750 | -0.205287 |
| 8        | 0.730803  | 1.051994  | -1.703995 |
| 1        | 0.257262  | 0.622950  | -2.440393 |
| 1        | 0.385477  | 2.238954  | -1.422583 |
| 8        | -0.047306 | 3.140146  | -0.822962 |
| 1        | -0.602429 | 3.752598  | -1.336267 |
| 1        | -0.611230 | 2.632685  | -0.170838 |
| <b>B</b> |           |           |           |
| 7        | 0.993987  | 0.670069  | 0.965149  |
| 6        | 1.668625  | 0.560940  | -0.340264 |
| 7        | 0.675034  | -0.316723 | -0.994427 |
| 6        | -0.527537 | -0.006992 | -0.499827 |
| 8        | -0.428680 | 0.683283  | 0.609197  |
| 6        | 3.028225  | -0.080931 | -0.182274 |
| 7        | -1.709246 | -0.308632 | -0.977308 |
| 6        | -2.982739 | 0.013727  | -0.284216 |
| 6        | 4.172747  | 0.718511  | -0.187473 |
| 6        | 5.425622  | 0.134891  | -0.017190 |
| 6        | 5.533989  | -1.240145 | 0.163512  |
| 6        | 4.388281  | -2.034705 | 0.187591  |
| 6        | 3.135227  | -1.457432 | 0.021834  |
| 6        | -3.299725 | -1.024537 | 0.792420  |
| 6        | -4.633034 | -0.687994 | 1.467886  |
| 6        | -5.761977 | -0.588231 | 0.439528  |
| 6        | -5.427100 | 0.436488  | -0.646194 |
| 6        | -4.093775 | 0.110386  | -1.327086 |
| 6        | 1.255241  | 1.902278  | 1.700735  |
| 8        | 1.696359  | 1.790243  | -0.984610 |
| 1        | 0.811468  | -0.635999 | -1.946019 |
| 1        | -1.758610 | -0.836455 | -1.841653 |
| 1        | -2.838174 | 0.995806  | 0.180440  |
| 1        | 4.097117  | 1.797228  | -0.298047 |
| 1        | 6.313580  | 0.757819  | -0.021228 |
| 1        | 6.510719  | -1.694262 | 0.293874  |
| 1        | 4.471896  | -3.105651 | 0.339540  |
| 1        | 2.239982  | -2.070413 | 0.057245  |
| 1        | -3.363864 | -2.012771 | 0.317159  |
| 1        | -2.486423 | -1.061132 | 1.525622  |
| 1        | -4.860478 | -1.447693 | 2.221021  |
| 1        | -4.537258 | 0.267407  | 2.000917  |
| 1        | -5.919157 | -1.571339 | -0.023746 |
| 1        | -6.699351 | -0.317434 | 0.933950  |
| 1        | -6.218024 | 0.476228  | -1.400397 |
| 1        | -5.364929 | 1.437467  | -0.199398 |

|          |           |           |           |
|----------|-----------|-----------|-----------|
| 1        | -4.179073 | -0.857177 | -1.844357 |
| 1        | -3.842418 | 0.869213  | -2.076039 |
| 1        | 0.694680  | 1.859243  | 2.634287  |
| 1        | 1.005322  | 2.797903  | 1.127807  |
| 1        | 2.323221  | 1.888712  | 1.931921  |
| 1        | 2.447499  | 1.824573  | -1.597392 |
| <b>C</b> |           |           |           |
| 7        | -1.148988 | 1.274452  | -0.212778 |
| 6        | -1.731196 | 0.149161  | 0.136482  |
| 7        | -0.817851 | -0.667637 | 0.658346  |
| 6        | 0.519866  | -0.055116 | 0.748292  |
| 8        | 0.202472  | 1.250406  | 0.079803  |
| 6        | -3.151011 | -0.165644 | -0.022603 |
| 7        | 1.471042  | -0.836707 | 0.121442  |
| 6        | 2.906562  | -0.531556 | 0.291140  |
| 6        | -4.124592 | 0.803403  | 0.248436  |
| 6        | -5.467203 | 0.474958  | 0.112458  |
| 6        | -5.833950 | -0.808090 | -0.291725 |
| 6        | -4.862174 | -1.772775 | -0.554144 |
| 6        | -3.516480 | -1.458485 | -0.415129 |
| 6        | 3.282759  | 0.883826  | -0.155551 |
| 6        | 4.788146  | 1.119560  | -0.001862 |
| 6        | 5.591788  | 0.069877  | -0.771763 |
| 6        | 5.208599  | -1.343955 | -0.329682 |
| 6        | 3.703985  | -1.582834 | -0.479656 |
| 6        | -1.549228 | 2.351827  | -1.100400 |
| 8        | 0.917654  | 0.210076  | 2.022050  |
| 1        | -1.032432 | -1.512989 | 1.172879  |
| 1        | 1.215538  | -1.044259 | -0.839367 |
| 1        | 3.122279  | -0.641011 | 1.359485  |
| 1        | -3.834407 | 1.791284  | 0.595033  |
| 1        | -6.227821 | 1.217136  | 0.329138  |
| 1        | -6.884309 | -1.058760 | -0.398269 |
| 1        | -5.153061 | -2.768826 | -0.869362 |
| 1        | -2.754260 | -2.200600 | -0.635465 |
| 1        | 2.993198  | 1.007541  | -1.209737 |
| 1        | 2.717917  | 1.622757  | 0.424941  |
| 1        | 5.042885  | 2.127771  | -0.342609 |
| 1        | 5.051892  | 1.069609  | 1.063250  |
| 1        | 5.395661  | 0.179814  | -1.847202 |
| 1        | 6.664122  | 0.232967  | -0.627023 |
| 1        | 5.759157  | -2.092114 | -0.907854 |
| 1        | 5.491108  | -1.485845 | 0.721948  |
| 1        | 3.435232  | -1.519894 | -1.545775 |
| 1        | 3.426234  | -2.582951 | -0.130891 |
| 1        | -0.850711 | 2.372809  | -1.939172 |
| 1        | -1.515018 | 3.300031  | -0.561695 |
| 1        | -2.559097 | 2.147174  | -1.453992 |
| 1        | 0.410246  | 0.958784  | 2.372095  |
| <b>D</b> |           |           |           |

|                        |           |           |           |
|------------------------|-----------|-----------|-----------|
| 7                      | -1.109318 | -1.226830 | -0.643642 |
| 6                      | -1.695305 | -0.135550 | -0.228776 |
| 7                      | -0.855388 | 0.922539  | 0.022858  |
| 6                      | 0.304348  | 0.406248  | -0.277579 |
| 8                      | 0.245195  | -0.868089 | -0.676696 |
| 6                      | -3.152430 | -0.053661 | -0.039870 |
| 7                      | 1.511296  | 1.010734  | -0.268204 |
| 6                      | 2.756713  | 0.245727  | -0.296484 |
| 6                      | -3.969465 | -1.147462 | -0.340769 |
| 6                      | -5.342652 | -1.056034 | -0.153515 |
| 6                      | -5.906866 | 0.122530  | 0.333690  |
| 6                      | -5.092427 | 1.211661  | 0.632346  |
| 6                      | -3.716338 | 1.126590  | 0.445849  |
| 6                      | 3.010882  | -0.512576 | 1.011084  |
| 6                      | 4.333014  | -1.281069 | 0.948521  |
| 6                      | 5.497960  | -0.343337 | 0.624759  |
| 6                      | 5.240438  | 0.420716  | -0.676319 |
| 6                      | 3.915735  | 1.185954  | -0.620558 |
| 1                      | 1.516270  | 1.902763  | 0.210366  |
| 1                      | 2.657525  | -0.482039 | -1.111757 |
| 1                      | -3.518592 | -2.059159 | -0.720036 |
| 1                      | -5.975717 | -1.905843 | -0.389337 |
| 1                      | -6.980777 | 0.190560  | 0.479138  |
| 1                      | -5.528774 | 2.130494  | 1.011733  |
| 1                      | -3.066310 | 1.965334  | 0.672601  |
| 1                      | 3.045132  | 0.216963  | 1.833215  |
| 1                      | 2.174007  | -1.191129 | 1.209057  |
| 1                      | 4.508880  | -1.800866 | 1.895882  |
| 1                      | 4.262499  | -2.054808 | 0.171648  |
| 1                      | 5.621548  | 0.375906  | 1.446429  |
| 1                      | 6.434038  | -0.907176 | 0.553133  |
| 1                      | 6.061221  | 1.114800  | -0.884563 |
| 1                      | 5.206804  | -0.290755 | -1.512653 |
| 1                      | 3.975654  | 1.955977  | 0.164084  |
| 1                      | 3.717262  | 1.700166  | -1.566744 |
| <b>TS<sub>DE</sub></b> |           |           |           |
| 7                      | 0.903675  | 0.807236  | 0.832098  |
| 6                      | 1.506343  | 0.156917  | -0.226813 |
| 7                      | 0.573205  | -0.545227 | -0.966262 |
| 6                      | -0.559624 | -0.062585 | -0.539418 |
| 8                      | -0.480356 | 0.819337  | 0.460383  |
| 6                      | 2.880513  | -0.367993 | -0.016342 |
| 7                      | -1.783631 | -0.339248 | -1.016636 |
| 6                      | -3.013166 | -0.007276 | -0.298134 |
| 6                      | 3.832936  | 0.417518  | 0.636276  |
| 6                      | 5.104537  | -0.093799 | 0.859312  |
| 6                      | 5.428531  | -1.381513 | 0.431125  |
| 6                      | 4.477667  | -2.156721 | -0.224441 |
| 6                      | 3.199455  | -1.650879 | -0.449752 |
| 6                      | -3.199957 | -0.855050 | 0.964879  |



|                        |           |           |           |
|------------------------|-----------|-----------|-----------|
| 6                      | -4.509245 | -0.494203 | 1.670029  |
| 6                      | -5.703525 | -0.652800 | 0.726978  |
| 6                      | -5.513536 | 0.183705  | -0.540985 |
| 6                      | -4.200409 | -0.164351 | -1.246082 |
| 1                      | -1.805091 | -1.090170 | -1.694691 |
| 1                      | -2.933950 | 1.047743  | -0.005523 |
| 1                      | 3.579849  | 1.429758  | 0.943719  |
| 1                      | 5.848794  | 0.515096  | 1.363087  |
| 1                      | 6.424649  | -1.777143 | 0.605735  |
| 1                      | 4.729113  | -3.157478 | -0.562158 |
| 1                      | 2.443294  | -2.238550 | -0.959672 |
| 1                      | -3.215704 | -1.914252 | 0.671290  |
| 1                      | -2.343325 | -0.711430 | 1.631737  |
| 1                      | -4.636817 | -1.116796 | 2.561405  |
| 1                      | -4.456670 | 0.546903  | 2.017205  |
| 1                      | -5.805896 | -1.711143 | 0.449468  |
| 1                      | -6.631099 | -0.365886 | 1.233297  |
| 1                      | -6.352553 | 0.038834  | -1.229159 |
| 1                      | -5.503729 | 1.248835  | -0.272649 |
| 1                      | -4.239763 | -1.209700 | -1.588721 |
| 1                      | -4.051109 | 0.463410  | -2.131280 |
| 8                      | 2.020227  | 1.560758  | -1.399238 |
| 1                      | 1.948915  | 2.477952  | -0.625070 |
| 1                      | 1.308775  | 1.592846  | -2.056228 |
| 8                      | 1.834458  | 3.059322  | 0.435661  |
| 1                      | 1.205153  | 3.791000  | 0.382292  |
| 1                      | 1.256676  | 1.939688  | 0.867290  |
| <b>TS<sub>DF</sub></b> |           |           |           |
| 7                      | 1.206297  | -1.610759 | 0.340459  |
| 6                      | 1.788682  | -0.545090 | -0.108014 |
| 7                      | 0.903095  | 0.364391  | -0.640097 |
| 6                      | -0.319941 | -0.131265 | -0.294344 |
| 8                      | -0.172062 | -1.381666 | 0.130864  |
| 6                      | 3.241270  | -0.339283 | -0.077801 |
| 7                      | -1.477256 | 0.288962  | -0.819283 |
| 6                      | -2.722957 | -0.129952 | -0.147138 |
| 6                      | 4.048929  | -1.210389 | 0.659664  |
| 6                      | 5.422588  | -1.012520 | 0.692239  |
| 6                      | 5.994015  | 0.052230  | -0.004159 |
| 6                      | 5.189025  | 0.918636  | -0.738211 |
| 6                      | 3.812062  | 0.724771  | -0.778085 |
| 6                      | -3.513215 | -1.095575 | -1.027954 |
| 6                      | -4.822214 | -1.497235 | -0.344157 |
| 6                      | -5.655393 | -0.263654 | 0.014732  |
| 6                      | -4.854099 | 0.704704  | 0.889131  |
| 6                      | -3.541044 | 1.107386  | 0.215000  |
| 1                      | -1.414061 | 1.290942  | -1.013026 |
| 1                      | -2.434820 | -0.627008 | 0.787099  |
| 1                      | 3.587359  | -2.029860 | 1.201284  |
| 1                      | 6.049970  | -1.686383 | 1.266775  |

|          |           |           |           |
|----------|-----------|-----------|-----------|
| 1        | 7.068186  | 0.205821  | 0.026670  |
| 1        | 5.632948  | 1.745282  | -1.283452 |
| 1        | 3.184190  | 1.389679  | -1.363997 |
| 1        | -3.729034 | -0.600183 | -1.984772 |
| 1        | -2.897876 | -1.974193 | -1.251134 |
| 1        | -5.393220 | -2.171748 | -0.990882 |
| 1        | -4.593038 | -2.056210 | 0.573682  |
| 1        | -5.955739 | 0.249208  | -0.909826 |
| 1        | -6.577061 | -0.562468 | 0.525985  |
| 1        | -5.446121 | 1.597311  | 1.117352  |
| 1        | -4.626818 | 0.221724  | 1.849163  |
| 1        | -3.759808 | 1.669476  | -0.705971 |
| 1        | -2.932813 | 1.743420  | 0.866226  |
| 8        | -0.552352 | 0.880731  | 1.491290  |
| 1        | 0.135657  | 0.659836  | 2.135572  |
| 1        | -0.255606 | 1.932881  | 0.858373  |
| 8        | 0.012247  | 2.634886  | -0.033604 |
| 1        | 0.282187  | 3.508739  | 0.270795  |
| 1        | 0.941658  | 1.427374  | -0.557278 |
| <b>E</b> |           |           |           |
| 7        | -1.013006 | -0.549252 | 1.470297  |
| 6        | -1.744702 | -0.977563 | 0.236954  |
| 7        | -0.756699 | -0.881589 | -0.813312 |
| 6        | 0.376013  | -0.842252 | -0.208948 |
| 8        | 0.373982  | -0.772056 | 1.138857  |
| 6        | -2.934735 | -0.056766 | 0.030310  |
| 7        | 1.603357  | -0.898177 | -0.780183 |
| 6        | 2.791265  | -0.368095 | -0.109732 |
| 6        | -4.203248 | -0.565202 | -0.229717 |
| 6        | -5.271407 | 0.303112  | -0.450787 |
| 6        | -5.073938 | 1.678974  | -0.413749 |
| 6        | -3.802384 | 2.189097  | -0.152535 |
| 6        | -2.738205 | 1.324436  | 0.069531  |
| 6        | 2.739831  | 1.153066  | 0.066321  |
| 6        | 4.013981  | 1.669665  | 0.738661  |
| 6        | 5.257889  | 1.254937  | -0.050576 |
| 6        | 5.307281  | -0.263906 | -0.232952 |
| 6        | 4.031454  | -0.786928 | -0.897381 |
| 8        | -2.185346 | -2.313542 | 0.370837  |
| 1        | -1.192840 | -1.266049 | 2.176261  |
| 1        | 1.566746  | -0.801080 | -1.787919 |
| 1        | 2.831615  | -0.836527 | 0.881403  |
| 1        | -4.347531 | -1.639062 | -0.252220 |
| 1        | -6.259776 | -0.100227 | -0.650339 |
| 1        | -5.906280 | 2.355066  | -0.585571 |
| 1        | -3.642747 | 3.262682  | -0.119727 |
| 1        | -1.746039 | 1.711056  | 0.283550  |
| 1        | 2.632000  | 1.613513  | -0.926492 |
| 1        | 1.852575  | 1.421062  | 0.650294  |
| 1        | 3.968463  | 2.758687  | 0.842208  |

|          |           |           |           |
|----------|-----------|-----------|-----------|
| 1        | 4.077196  | 1.257970  | 1.755475  |
| 1        | 5.235845  | 1.736776  | -1.038072 |
| 1        | 6.165013  | 1.604864  | 0.453584  |
| 1        | 6.180735  | -0.552583 | -0.826647 |
| 1        | 5.420496  | -0.741447 | 0.749929  |
| 1        | 3.957641  | -0.372192 | -1.914584 |
| 1        | 4.054526  | -1.877678 | -0.992674 |
| 1        | -1.686862 | -2.822367 | -0.286016 |
| <b>F</b> |           |           |           |
| 7        | -1.272345 | 1.077697  | 1.053992  |
| 6        | -1.801568 | 0.136053  | 0.362347  |
| 7        | -0.909421 | -0.867854 | -0.023462 |
| 6        | 0.369981  | -0.471440 | 0.549755  |
| 8        | 0.060968  | 0.716857  | 1.284005  |
| 6        | -3.220495 | 0.104228  | -0.014565 |
| 7        | 1.291189  | -0.184918 | -0.487668 |
| 6        | 2.672421  | 0.099678  | -0.092847 |
| 6        | -4.142521 | 0.911056  | 0.659977  |
| 6        | -5.483707 | 0.872604  | 0.303722  |
| 6        | -5.915131 | 0.026175  | -0.717920 |
| 6        | -4.998416 | -0.777330 | -1.389110 |
| 6        | -3.651365 | -0.737867 | -1.041653 |
| 6        | 3.259999  | 1.157848  | -1.029479 |
| 6        | 4.702723  | 1.503792  | -0.653804 |
| 6        | 5.584497  | 0.252976  | -0.629832 |
| 6        | 5.004838  | -0.802387 | 0.314181  |
| 6        | 3.561828  | -1.149081 | -0.062073 |
| 8        | 0.866295  | -1.414427 | 1.457927  |
| 1        | -1.183493 | -1.816990 | 0.214826  |
| 1        | 1.220329  | -0.881768 | -1.223636 |
| 1        | 2.625324  | 0.523976  | 0.919289  |
| 1        | -3.791745 | 1.557500  | 1.458109  |
| 1        | -6.198024 | 1.499785  | 0.827838  |
| 1        | -6.965702 | -0.004217 | -0.990031 |
| 1        | -5.329605 | -1.430935 | -2.189964 |
| 1        | -2.925661 | -1.341631 | -1.578445 |
| 1        | 3.232414  | 0.765012  | -2.057086 |
| 1        | 2.618057  | 2.043893  | -1.010108 |
| 1        | 5.106929  | 2.245287  | -1.351438 |
| 1        | 4.713023  | 1.968721  | 0.342186  |
| 1        | 5.643711  | -0.165707 | -1.644449 |
| 1        | 6.606998  | 0.511703  | -0.333049 |
| 1        | 5.624258  | -1.706007 | 0.308528  |
| 1        | 5.022957  | -0.413851 | 1.342194  |
| 1        | 3.551085  | -1.601286 | -1.066778 |
| 1        | 3.137329  | -1.880757 | 0.631125  |
| 1        | 0.449239  | -1.224477 | 2.313202  |

**Table S4.** Cartesian atomic coordinates for optimized equilibrium model structures ( $\omega$ B97XD/6-31++G\*\* level of theory).

| Atomic charge | X         | Y         | Z         |
|---------------|-----------|-----------|-----------|
| <b>3</b>      |           |           |           |
| 9             | -5.000429 | -1.690751 | -1.220295 |
| 9             | -4.902625 | -2.038911 | 0.912114  |
| 9             | -6.355325 | -0.645282 | 0.109747  |
| 8             | 2.484256  | 2.214896  | -1.103344 |
| 8             | 0.031095  | -0.812385 | 0.331443  |
| 7             | 0.519732  | 1.265832  | -0.485280 |
| 1             | 0.139518  | 2.132863  | -0.836593 |
| 7             | 2.534690  | 0.078755  | -0.285099 |
| 1             | 1.945525  | -0.664943 | 0.076356  |
| 6             | 3.981729  | -0.079178 | -0.351115 |
| 1             | 4.320172  | 0.423050  | -1.265498 |
| 6             | 1.933594  | 1.222930  | -0.648689 |
| 6             | -1.772029 | 0.718597  | 0.110935  |
| 6             | 4.322196  | -1.567455 | -0.442106 |
| 1             | 3.840293  | -2.002806 | -1.324374 |
| 1             | 3.911100  | -2.081318 | 0.439209  |
| 6             | -4.080499 | 0.027295  | 0.114067  |
| 6             | -2.728864 | -0.289356 | 0.015609  |
| 1             | -2.402479 | -1.313332 | -0.133301 |
| 6             | -0.331992 | 0.310935  | 0.004194  |
| 6             | -2.175711 | 2.038689  | 0.334400  |
| 1             | -1.441769 | 2.829687  | 0.457647  |
| 6             | 5.837204  | -1.785247 | -0.492416 |
| 1             | 6.054951  | -2.858121 | -0.520194 |
| 1             | 6.231510  | -1.359317 | -1.425118 |
| 6             | 4.678450  | 0.577669  | 0.846707  |
| 1             | 4.275762  | 0.135132  | 1.768529  |
| 1             | 4.437848  | 1.645104  | 0.861247  |
| 6             | -4.485544 | 1.342286  | 0.328961  |
| 1             | -5.539679 | 1.579712  | 0.411866  |
| 6             | 6.193317  | 0.362979  | 0.787375  |
| 1             | 6.667658  | 0.814163  | 1.665236  |
| 1             | 6.598288  | 0.883345  | -0.091342 |
| 6             | -3.527120 | 2.345164  | 0.446879  |
| 1             | -3.835686 | 3.368041  | 0.632801  |
| 6             | -5.090478 | -1.083453 | -0.019569 |
| 6             | 6.540246  | -1.125649 | 0.697685  |
| 1             | 7.624166  | -1.260322 | 0.615105  |
| 1             | 6.227484  | -1.625873 | 1.624699  |
| <b>10</b>     |           |           |           |
| 8             | 1.097136  | 0.895974  | 1.218238  |
| 8             | -0.718935 | -2.421119 | -0.477672 |
| 7             | -1.058788 | -0.742045 | 1.042072  |
| 1             | -0.644629 | 0.113674  | 1.399711  |
| 7             | 0.995208  | -0.999088 | -0.055303 |
| 1             | 1.464383  | -1.554260 | -0.756184 |
| 6             | -0.336037 | -1.441979 | 0.147734  |
| 6             | 1.645545  | 0.088273  | 0.477491  |

|                                           |           |           |           |
|-------------------------------------------|-----------|-----------|-----------|
| 6                                         | 3.082227  | 0.239377  | 0.084251  |
| 6                                         | -3.393252 | -0.213609 | 0.419997  |
| 6                                         | -2.462551 | -1.042920 | 1.279451  |
| 1                                         | -2.665990 | -0.864124 | 2.339010  |
| 1                                         | -2.606203 | -2.107380 | 1.082251  |
| 6                                         | -4.072484 | 0.880749  | 0.955847  |
| 1                                         | -3.950899 | 1.125213  | 2.008413  |
| 6                                         | -3.559925 | -0.521673 | -0.934279 |
| 1                                         | -3.032005 | -1.374369 | -1.352701 |
| 6                                         | 3.894677  | -0.849385 | -0.246873 |
| 1                                         | 3.508662  | -1.863976 | -0.206030 |
| 6                                         | -4.903416 | 1.662888  | 0.154887  |
| 1                                         | -5.424834 | 2.512656  | 0.584578  |
| 6                                         | 3.619845  | 1.529017  | 0.086826  |
| 1                                         | 2.982063  | 2.360641  | 0.366643  |
| 6                                         | -4.388375 | 0.258289  | -1.735481 |
| 1                                         | -4.513040 | 0.010720  | -2.785226 |
| 6                                         | 5.755499  | 0.644047  | -0.601574 |
| 1                                         | 6.795766  | 0.801801  | -0.867929 |
| 6                                         | -5.061614 | 1.353112  | -1.193020 |
| 1                                         | -5.707992 | 1.960074  | -1.819364 |
| 6                                         | 5.229087  | -0.645509 | -0.585964 |
| 1                                         | 5.858640  | -1.494834 | -0.830349 |
| 6                                         | 4.949877  | 1.730707  | -0.263444 |
| 1                                         | 5.360919  | 2.734946  | -0.269834 |
| <b>Supramolecular dimeric associate 3</b> |           |           |           |
| 9                                         | -4.644934 | -6.202262 | 2.919877  |
| 9                                         | -5.802576 | -4.460683 | 3.473773  |
| 9                                         | -6.343043 | -5.607189 | 1.714856  |
| 8                                         | 0.871997  | 0.524505  | 1.266403  |
| 8                                         | -1.692052 | -1.790677 | 3.479130  |
| 7                                         | -0.859521 | -0.916615 | 1.544470  |
| 1                                         | -0.906070 | -0.846206 | 0.521684  |
| 7                                         | 0.298277  | -0.022609 | 3.388087  |
| 1                                         | -0.339547 | -0.581689 | 3.948827  |
| 6                                         | 1.369630  | 0.754241  | 3.999612  |
| 1                                         | 2.284579  | 0.561636  | 3.423730  |
| 6                                         | 0.151266  | -0.093642 | 2.060944  |
| 6                                         | -2.625436 | -2.627293 | 1.467407  |
| 6                                         | 1.577898  | 0.272136  | 5.436128  |
| 1                                         | 1.802900  | -0.800145 | 5.436882  |
| 1                                         | 0.640521  | 0.407644  | 5.994525  |
| 6                                         | -4.391615 | -4.269216 | 1.583296  |
| 6                                         | -3.506633 | -3.406566 | 2.219207  |
| 1                                         | -3.484531 | -3.323173 | 3.300044  |
| 6                                         | -1.695375 | -1.745136 | 2.251733  |
| 6                                         | -2.637797 | -2.724456 | 0.072144  |
| 1                                         | -1.977485 | -2.128484 | -0.547552 |
| 6                                         | 2.697874  | 1.057742  | 6.123774  |
| 1                                         | 2.802193  | 0.721694  | 7.160529  |

|   |           |           |           |
|---|-----------|-----------|-----------|
| 1 | 3.651382  | 0.837628  | 5.624570  |
| 6 | 1.088077  | 2.261210  | 3.959858  |
| 1 | 0.140291  | 2.454376  | 4.480241  |
| 1 | 0.959192  | 2.579699  | 2.921047  |
| 6 | -4.402311 | -4.372120 | 0.193470  |
| 1 | -5.092939 | -5.048258 | -0.297873 |
| 6 | 2.220169  | 3.040693  | 4.634501  |
| 1 | 2.000844  | 4.113383  | 4.612420  |
| 1 | 3.149962  | 2.896190  | 4.065233  |
| 6 | -3.524178 | -3.595392 | -0.554476 |
| 1 | -3.526058 | -3.667900 | -1.637149 |
| 6 | -5.299188 | -5.131244 | 2.420363  |
| 6 | 2.440057  | 2.566739  | 6.073934  |
| 1 | 3.277076  | 3.106411  | 6.529661  |
| 1 | 1.547634  | 2.802061  | 6.669960  |
| 9 | 4.644934  | 6.202262  | -2.919877 |
| 9 | 5.802576  | 4.460683  | -3.473773 |
| 9 | 6.343043  | 5.607189  | -1.714856 |
| 8 | -0.871997 | -0.524505 | -1.266403 |
| 8 | 1.692052  | 1.790677  | -3.479130 |
| 7 | 0.859521  | 0.916615  | -1.544470 |
| 1 | 0.906070  | 0.846206  | -0.521684 |
| 7 | -0.298277 | 0.022609  | -3.388087 |
| 1 | 0.339547  | 0.581689  | -3.948827 |
| 6 | -1.369630 | -0.754241 | -3.999612 |
| 1 | -2.284579 | -0.561636 | -3.423730 |
| 6 | -0.151266 | 0.093642  | -2.060944 |
| 6 | 2.625436  | 2.627293  | -1.467407 |
| 6 | -1.577898 | -0.272136 | -5.436128 |
| 1 | -1.802900 | 0.800145  | -5.436882 |
| 1 | -0.640521 | -0.407644 | -5.994525 |
| 6 | 4.391615  | 4.269216  | -1.583296 |
| 6 | 3.506633  | 3.406566  | -2.219207 |
| 1 | 3.484531  | 3.323173  | -3.300044 |
| 6 | 1.695375  | 1.745136  | -2.251733 |
| 6 | 2.637797  | 2.724456  | -0.072144 |
| 1 | 1.977485  | 2.128484  | 0.547552  |
| 6 | -2.697874 | -1.057742 | -6.123774 |
| 1 | -2.802193 | -0.721694 | -7.160529 |
| 1 | -3.651382 | -0.837628 | -5.624570 |
| 6 | -1.088077 | -2.261210 | -3.959858 |
| 1 | -0.140291 | -2.454376 | -4.480241 |
| 1 | -0.959192 | -2.579699 | -2.921047 |
| 6 | 4.402311  | 4.372120  | -0.193470 |
| 1 | 5.092939  | 5.048258  | 0.297873  |
| 6 | -2.220169 | -3.040693 | -4.634501 |
| 1 | -2.000844 | -4.113383 | -4.612420 |
| 1 | -3.149962 | -2.896190 | -4.065233 |
| 6 | 3.524178  | 3.595392  | 0.554476  |
| 1 | 3.526058  | 3.667900  | 1.637149  |

|                                            |           |           |           |
|--------------------------------------------|-----------|-----------|-----------|
| 6                                          | 5.299188  | 5.131244  | -2.420363 |
| 6                                          | -2.440057 | -2.566739 | -6.073934 |
| 1                                          | -3.277076 | -3.106411 | -6.529661 |
| 1                                          | -1.547634 | -2.802061 | -6.669960 |
| <b>Supramolecular dimeric associate 10</b> |           |           |           |
| 8                                          | 1.404719  | 0.786367  | -0.139387 |
| 8                                          | -0.169316 | 4.441847  | -1.276650 |
| 7                                          | -0.656603 | 2.208990  | -1.286604 |
| 1                                          | -0.360463 | 1.278054  | -1.005133 |
| 7                                          | 1.437082  | 3.022247  | -0.555496 |
| 1                                          | 1.932873  | 3.889436  | -0.403264 |
| 6                                          | 0.125408  | 3.274445  | -1.064269 |
| 6                                          | 2.003249  | 1.860325  | -0.127493 |
| 6                                          | 3.408088  | 1.952299  | 0.377764  |
| 6                                          | -2.925272 | 2.689646  | -0.443583 |
| 6                                          | -2.054848 | 2.393425  | -1.647948 |
| 1                                          | -2.371257 | 1.463668  | -2.125023 |
| 1                                          | -2.122796 | 3.204492  | -2.376309 |
| 6                                          | -3.120820 | 1.704928  | 0.529734  |
| 1                                          | -2.660056 | 0.728826  | 0.398762  |
| 6                                          | -3.516020 | 3.941402  | -0.273786 |
| 1                                          | -3.346190 | 4.716217  | -1.015984 |
| 6                                          | 4.330710  | 2.873079  | -0.128798 |
| 1                                          | 4.052181  | 3.554701  | -0.927557 |
| 6                                          | -3.898881 | 1.969768  | 1.652570  |
| 1                                          | -4.044805 | 1.194576  | 2.399273  |
| 6                                          | 3.801352  | 1.048646  | 1.367578  |
| 1                                          | 3.084610  | 0.320586  | 1.731839  |
| 6                                          | -4.299965 | 4.207023  | 0.848349  |
| 1                                          | -4.753643 | 5.185803  | 0.971353  |
| 6                                          | 6.015030  | 2.004672  | 1.364743  |
| 1                                          | 7.028756  | 2.028159  | 1.752146  |
| 6                                          | -4.492379 | 3.221895  | 1.813899  |
| 1                                          | -5.098414 | 3.429250  | 2.690862  |
| 6                                          | 5.632854  | 2.894254  | 0.362104  |
| 1                                          | 6.349246  | 3.603055  | -0.040069 |
| 6                                          | 5.098408  | 1.082345  | 1.866197  |
| 1                                          | 5.396055  | 0.380077  | 2.637720  |
| 8                                          | 0.790170  | -4.154661 | -0.438515 |
| 8                                          | -1.293682 | -0.658368 | -1.179414 |
| 7                                          | -1.490896 | -2.926606 | -1.182715 |
| 1                                          | -1.003057 | -3.787681 | -0.955370 |
| 7                                          | 0.539732  | -1.888371 | -0.644005 |
| 1                                          | 0.969856  | -0.980067 | -0.477249 |
| 6                                          | -0.813947 | -1.778256 | -1.011946 |
| 6                                          | 1.276740  | -3.027433 | -0.434519 |
| 6                                          | 2.739374  | -2.813293 | -0.196402 |
| 6                                          | -3.840010 | -2.639789 | -0.419046 |
| 6                                          | -2.893056 | -2.916533 | -1.568994 |
| 1                                          | -3.105847 | -3.895425 | -2.007252 |

|   |           |           |           |
|---|-----------|-----------|-----------|
| 1 | -3.028819 | -2.163342 | -2.349597 |
| 6 | -4.052239 | -3.604657 | 0.569792  |
| 1 | -3.539431 | -4.561690 | 0.507014  |
| 6 | -4.504252 | -1.417576 | -0.325249 |
| 1 | -4.328028 | -0.653870 | -1.077245 |
| 6 | 3.435506  | -1.730597 | -0.740887 |
| 1 | 2.922469  | -0.993578 | -1.349248 |
| 6 | -4.913130 | -3.350578 | 1.633121  |
| 1 | -5.070625 | -4.108433 | 2.394504  |
| 6 | 3.423608  | -3.766570 | 0.563029  |
| 1 | 2.874851  | -4.614159 | 0.959512  |
| 6 | -5.370820 | -1.160040 | 0.735620  |
| 1 | -5.870844 | -0.198671 | 0.797912  |
| 6 | 5.476450  | -2.535543 | 0.260105  |
| 1 | 6.541170  | -2.424127 | 0.440756  |
| 6 | -5.576308 | -2.126038 | 1.716843  |
| 1 | -6.251478 | -1.927653 | 2.543662  |
| 6 | 4.801817  | -1.595673 | -0.514446 |
| 1 | 5.334514  | -0.749975 | -0.937170 |
| 6 | 4.786131  | -3.621527 | 0.798700  |
| 1 | 5.312161  | -4.357822 | 1.397907  |
